# Supplementary material for: Spatial variability of VOCs, ozone, and carbonaceous aerosols during the 2022 European summer heatwave
Source: Copernicus journal article supplement (doi:10.5194/egusphere-2025-6166), 2025-12-30
Supplement: Supplementary file 1 [file IMP2022_data.xlsx]

## Sheet: info
The data presented here originate from the EMEP/ACTRIS Intensive Measurement Period (IMP2022), which focused on one week of coordinated VOC and organic tracer measurements at selected European sites from 12–19 July 2022 (Aas et al., 2026).
Details on instrumentation, analytical methods, quality assurance, and data processing are described in the manuscript and further documented in the metadata associated with the individual datasets. Direct links to these metadata (DOIs) are provided in a separate sheet.
For VOCs, organic tracers, and particulate matter (PM), data were aggregated to daytime averages between 12:00 and 16:00 UTC, corresponding to the period during which the manual samples were collected. Sampling durations varied between 1 and 4 hours within this time window. For ozone, the daily 1-hour maximum was used instead of the daytime mean.
The VOCs that are reported and stored in EBAS in mass units were converted to mixing ratios (pptv) using standard temperature (273.15 K) and standard pressure (1013.25 hPa) to ensure consistency across datasets. Thus the aggregated VOC data are in pptv, ozone max and PM mass in ug m-3, EC/OC in C in ugC m-3, SO4 in ugS m-3, NO3, and NH4 in ugN m-3, while organic tracers in ng m-3
The tracers are organised into the different groups they are mainly associated with (i.e PBAP, BB, BSOA, Organic_acid, inorganic)
Particle number size distribution (PNSD) data were not aggregated; the hourly values used in the analysis can be accessed through the respective dataset DOIs.

## Sheet: data_aggregated
code	latitude	longitude	masl	group	comp	matrix	day in july 2022	avg conc.
AT0002R	47.7667	16.7667	117	Aromatics	1-2-3-trimethylbenzene	air	12	0.6338
AT0002R	47.7667	16.7667	117	Aromatics	1-2-3-trimethylbenzene	air	13
AT0002R	47.7667	16.7667	117	Aromatics	1-2-3-trimethylbenzene	air	14	0.3168
AT0002R	47.7667	16.7667	117	Aromatics	1-2-3-trimethylbenzene	air	15	0.3669
AT0002R	47.7667	16.7667	117	Aromatics	1-2-3-trimethylbenzene	air	16	0.3002
AT0002R	47.7667	16.7667	117	Aromatics	1-2-3-trimethylbenzene	air	17	0.2668
AT0002R	47.7667	16.7667	117	Aromatics	1-2-3-trimethylbenzene	air	18	1.9179
AT0002R	47.7667	16.7667	117	Aromatics	1-2-4-trimethylbenzene	air	12	1.9179
AT0002R	47.7667	16.7667	117	Aromatics	1-2-4-trimethylbenzene	air	14	1.2843
AT0002R	47.7667	16.7667	117	Aromatics	1-2-4-trimethylbenzene	air	15	1.1674
AT0002R	47.7667	16.7667	117	Aromatics	1-2-4-trimethylbenzene	air	16	0.9172
AT0002R	47.7667	16.7667	117	Aromatics	1-2-4-trimethylbenzene	air	17	1.2008
AT0002R	47.7667	16.7667	117	Aromatics	1-2-4-trimethylbenzene	air	18	6.6545
AT0002R	47.7667	16.7667	117	Aromatics	1-3-5-trimethylbenzene	air	12	0.4337
AT0002R	47.7667	16.7667	117	Aromatics	1-3-5-trimethylbenzene	air	13
AT0002R	47.7667	16.7667	117	Aromatics	1-3-5-trimethylbenzene	air	14	0.3002
AT0002R	47.7667	16.7667	117	Aromatics	1-3-5-trimethylbenzene	air	15	0.2167
AT0002R	47.7667	16.7667	117	Aromatics	1-3-5-trimethylbenzene	air	16	0.1667
AT0002R	47.7667	16.7667	117	Aromatics	1-3-5-trimethylbenzene	air	17	0.7671
AT0002R	47.7667	16.7667	117	Aromatics	1-3-5-trimethylbenzene	air	18	3.569
AT0002R	47.7667	16.7667	117	Aromatics	1-ethyl-3-methylbenzene	air	12	1.3009
AT0002R	47.7667	16.7667	117	Aromatics	1-ethyl-3-methylbenzene	air	14	0.7505
AT0002R	47.7667	16.7667	117	Aromatics	1-ethyl-3-methylbenzene	air	15	0.8172
AT0002R	47.7667	16.7667	117	Aromatics	1-ethyl-3-methylbenzene	air	16	0.5838
AT0002R	47.7667	16.7667	117	Aromatics	1-ethyl-3-methylbenzene	air	17	1.3509
AT0002R	47.7667	16.7667	117	Aromatics	1-ethyl-3-methylbenzene	air	18	5.07
AT0002R	47.7667	16.7667	117	Aromatics	1-ethyl-4-methylbenzene	air	12	0.8005
AT0002R	47.7667	16.7667	117	Aromatics	1-ethyl-4-methylbenzene	air	14	1.8512
AT0002R	47.7667	16.7667	117	Aromatics	1-ethyl-4-methylbenzene	air	15	0.9006
AT0002R	47.7667	16.7667	117	Aromatics	1-ethyl-4-methylbenzene	air	16	0.3168
AT0002R	47.7667	16.7667	117	Aromatics	1-ethyl-4-methylbenzene	air	17	0.7839
AT0002R	47.7667	16.7667	117	Aromatics	1-ethyl-4-methylbenzene	air	18	2.0514
AT0002R	47.7667	16.7667	117	Aromatics	benzene	air	12	0
AT0002R	47.7667	16.7667	117	Aromatics	benzene	air	13
AT0002R	47.7667	16.7667	117	Aromatics	benzene	air	14	0
AT0002R	47.7667	16.7667	117	Aromatics	benzene	air	15	0
AT0002R	47.7667	16.7667	117	Aromatics	benzene	air	16	0
AT0002R	47.7667	16.7667	117	Aromatics	benzene	air	17	35.1576
AT0002R	47.7667	16.7667	117	Aromatics	benzene	air	18	8.2891
AT0002R	47.7667	16.7667	117	Aromatics	ethylbenzene	air	12	3.8518
AT0002R	47.7667	16.7667	117	Aromatics	ethylbenzene	air	13
AT0002R	47.7667	16.7667	117	Aromatics	ethylbenzene	air	14	4.3049
AT0002R	47.7667	16.7667	117	Aromatics	ethylbenzene	air	15	4.6827
AT0002R	47.7667	16.7667	117	Aromatics	ethylbenzene	air	16	4.3428
AT0002R	47.7667	16.7667	117	Aromatics	ethylbenzene	air	17	4.2295
AT0002R	47.7667	16.7667	117	Aromatics	ethylbenzene	air	18	13.3492
AT0002R	47.7667	16.7667	117	Aromatics	m-p-xylene	air	12	6.212
AT0002R	47.7667	16.7667	117	Aromatics	m-p-xylene	air	13
AT0002R	47.7667	16.7667	117	Aromatics	m-p-xylene	air	14	3.7573
AT0002R	47.7667	16.7667	117	Aromatics	m-p-xylene	air	15	4.5882
AT0002R	47.7667	16.7667	117	Aromatics	m-p-xylene	air	16	3.7007
AT0002R	47.7667	16.7667	117	Aromatics	m-p-xylene	air	17	5.098
AT0002R	47.7667	16.7667	117	Aromatics	m-p-xylene	air	18	24.0171
AT0002R	47.7667	16.7667	117	Aromatics	o-xylene	air	12	3.3986
AT0002R	47.7667	16.7667	117	Aromatics	o-xylene	air	13
AT0002R	47.7667	16.7667	117	Aromatics	o-xylene	air	14	2.7756
AT0002R	47.7667	16.7667	117	Aromatics	o-xylene	air	15	3.2854
AT0002R	47.7667	16.7667	117	Aromatics	o-xylene	air	16	2.3224
AT0002R	47.7667	16.7667	117	Aromatics	o-xylene	air	17	3.1154
AT0002R	47.7667	16.7667	117	Aromatics	o-xylene	air	18	7.4016
AT0002R	47.7667	16.7667	117	Aromatics	styrene	air	12	0
AT0002R	47.7667	16.7667	117	Aromatics	styrene	air	13
AT0002R	47.7667	16.7667	117	Aromatics	styrene	air	14	9.51308
AT0002R	47.7667	16.7667	117	Aromatics	styrene	air	15	0
AT0002R	47.7667	16.7667	117	Aromatics	styrene	air	16	6.6075
AT0002R	47.7667	16.7667	117	Aromatics	styrene	air	17	4.02476
AT0002R	47.7667	16.7667	117	Aromatics	styrene	air	18	3.14233
AT0002R	47.7667	16.7667	117	Aromatics	toluene	air	12	23
AT0002R	47.7667	16.7667	117	Aromatics	toluene	air	13	36
AT0002R	47.7667	16.7667	117	Aromatics	toluene	air	14	37
AT0002R	47.7667	16.7667	117	Aromatics	toluene	air	15	32
AT0002R	47.7667	16.7667	117	Aromatics	toluene	air	16	40
AT0002R	47.7667	16.7667	117	Aromatics	toluene	air	17	89
AT0002R	47.7667	16.7667	117	Aromatics	toluene	air	18	33
AT0002R	47.7667	16.7667	117	BB	levoglucosan	pm25	12	14.2
AT0002R	47.7667	16.7667	117	BB	levoglucosan	pm25	13	31.05
AT0002R	47.7667	16.7667	117	BB	levoglucosan	pm25	14	22.29
AT0002R	47.7667	16.7667	117	BB	levoglucosan	pm25	15	16.94
AT0002R	47.7667	16.7667	117	BB	levoglucosan	pm25	16	27.67
AT0002R	47.7667	16.7667	117	BB	levoglucosan	pm25	17	18.23
AT0002R	47.7667	16.7667	117	BB	levoglucosan	pm25	18	16.07
AT0002R	47.7667	16.7667	117	BB	levoglucosan	pm25	19	14.98
AT0002R	47.7667	16.7667	117	BSOA	3-MBTCA	pm25	12	11.86
AT0002R	47.7667	16.7667	117	BSOA	3-MBTCA	pm25	13	12.5
AT0002R	47.7667	16.7667	117	BSOA	3-MBTCA	pm25	14	15.19
AT0002R	47.7667	16.7667	117	BSOA	3-MBTCA	pm25	15	10.11
AT0002R	47.7667	16.7667	117	BSOA	3-MBTCA	pm25	16	9.37
AT0002R	47.7667	16.7667	117	BSOA	3-MBTCA	pm25	17	6.19
AT0002R	47.7667	16.7667	117	BSOA	3-MBTCA	pm25	18	8.41
AT0002R	47.7667	16.7667	117	BSOA	3-MBTCA	pm25	19	12.47
AT0002R	47.7667	16.7667	117	BSOA	sum_2-methyltetrols	pm25	12	6.31
AT0002R	47.7667	16.7667	117	BSOA	sum_2-methyltetrols	pm25	13	6.55
AT0002R	47.7667	16.7667	117	BSOA	sum_2-methyltetrols	pm25	14	11.92
AT0002R	47.7667	16.7667	117	BSOA	sum_2-methyltetrols	pm25	15	10.37
AT0002R	47.7667	16.7667	117	BSOA	sum_2-methyltetrols	pm25	16	13.49
AT0002R	47.7667	16.7667	117	BSOA	sum_2-methyltetrols	pm25	17	13.1
AT0002R	47.7667	16.7667	117	BSOA	sum_2-methyltetrols	pm25	18	11.68
AT0002R	47.7667	16.7667	117	BSOA	sum_2-methyltetrols	pm25	19	17.77
AT0002R	47.7667	16.7667	117	Inorganic	ammonium	pm25	12	0.175
AT0002R	47.7667	16.7667	117	Inorganic	ammonium	pm25	13	0.22
AT0002R	47.7667	16.7667	117	Inorganic	ammonium	pm25	14	0.137
AT0002R	47.7667	16.7667	117	Inorganic	ammonium	pm25	15	0.282
AT0002R	47.7667	16.7667	117	Inorganic	ammonium	pm25	16	0.348
AT0002R	47.7667	16.7667	117	Inorganic	ammonium	pm25	17	0.169
AT0002R	47.7667	16.7667	117	Inorganic	ammonium	pm25	18	0.191
AT0002R	47.7667	16.7667	117	Inorganic	ammonium	pm25	19	0.199
AT0002R	47.7667	16.7667	117	Inorganic	calcium	pm25	12	0.055
AT0002R	47.7667	16.7667	117	Inorganic	calcium	pm25	13	0.073
AT0002R	47.7667	16.7667	117	Inorganic	calcium	pm25	14	0.085
AT0002R	47.7667	16.7667	117	Inorganic	calcium	pm25	15	0.054
AT0002R	47.7667	16.7667	117	Inorganic	calcium	pm25	16	0.057
AT0002R	47.7667	16.7667	117	Inorganic	calcium	pm25	17	0.056
AT0002R	47.7667	16.7667	117	Inorganic	calcium	pm25	18	0.117
AT0002R	47.7667	16.7667	117	Inorganic	calcium	pm25	19	0.126
AT0002R	47.7667	16.7667	117	Inorganic	chloride	pm25	12	0.007
AT0002R	47.7667	16.7667	117	Inorganic	chloride	pm25	13	0.004
AT0002R	47.7667	16.7667	117	Inorganic	chloride	pm25	14	0.0034
AT0002R	47.7667	16.7667	117	Inorganic	chloride	pm25	15	0.0034
AT0002R	47.7667	16.7667	117	Inorganic	chloride	pm25	16	0.0034
AT0002R	47.7667	16.7667	117	Inorganic	chloride	pm25	17	0.0034
AT0002R	47.7667	16.7667	117	Inorganic	chloride	pm25	18	0.0034
AT0002R	47.7667	16.7667	117	Inorganic	chloride	pm25	19	0.0034
AT0002R	47.7667	16.7667	117	Inorganic	magnesium	pm25	12	0.017
AT0002R	47.7667	16.7667	117	Inorganic	magnesium	pm25	13	0.017
AT0002R	47.7667	16.7667	117	Inorganic	magnesium	pm25	14	0.018
AT0002R	47.7667	16.7667	117	Inorganic	magnesium	pm25	15	0.019
AT0002R	47.7667	16.7667	117	Inorganic	magnesium	pm25	16	0.02
AT0002R	47.7667	16.7667	117	Inorganic	magnesium	pm25	17	0.021
AT0002R	47.7667	16.7667	117	Inorganic	magnesium	pm25	18	0.03
AT0002R	47.7667	16.7667	117	Inorganic	magnesium	pm25	19	0.029
AT0002R	47.7667	16.7667	117	Inorganic	nitrate	pm25	12	0.016
AT0002R	47.7667	16.7667	117	Inorganic	nitrate	pm25	13	0.015
AT0002R	47.7667	16.7667	117	Inorganic	nitrate	pm25	14	0.015
AT0002R	47.7667	16.7667	117	Inorganic	nitrate	pm25	15	0.017
AT0002R	47.7667	16.7667	117	Inorganic	nitrate	pm25	16	0.021
AT0002R	47.7667	16.7667	117	Inorganic	nitrate	pm25	17	0.024
AT0002R	47.7667	16.7667	117	Inorganic	nitrate	pm25	18	0.025
AT0002R	47.7667	16.7667	117	Inorganic	nitrate	pm25	19	0.022
AT0002R	47.7667	16.7667	117	Inorganic	potassium	pm25	12	0.033
AT0002R	47.7667	16.7667	117	Inorganic	potassium	pm25	13	0.033
AT0002R	47.7667	16.7667	117	Inorganic	potassium	pm25	14	0.025
AT0002R	47.7667	16.7667	117	Inorganic	potassium	pm25	15	0.025
AT0002R	47.7667	16.7667	117	Inorganic	potassium	pm25	16	0.024
AT0002R	47.7667	16.7667	117	Inorganic	potassium	pm25	17	0.019
AT0002R	47.7667	16.7667	117	Inorganic	potassium	pm25	18	0.027
AT0002R	47.7667	16.7667	117	Inorganic	potassium	pm25	19	0.028
AT0002R	47.7667	16.7667	117	Inorganic	sodium	pm25	12	0.162
AT0002R	47.7667	16.7667	117	Inorganic	sodium	pm25	13	0.129
AT0002R	47.7667	16.7667	117	Inorganic	sodium	pm25	14	0.109
AT0002R	47.7667	16.7667	117	Inorganic	sodium	pm25	15	0.171
AT0002R	47.7667	16.7667	117	Inorganic	sodium	pm25	16	0.162
AT0002R	47.7667	16.7667	117	Inorganic	sodium	pm25	17	0.17
AT0002R	47.7667	16.7667	117	Inorganic	sodium	pm25	18	0.17
AT0002R	47.7667	16.7667	117	Inorganic	sodium	pm25	19	0.149
AT0002R	47.7667	16.7667	117	Inorganic	sulphate_total	pm25	12	0.291
AT0002R	47.7667	16.7667	117	Inorganic	sulphate_total	pm25	13	0.281
AT0002R	47.7667	16.7667	117	Inorganic	sulphate_total	pm25	14	0.154
AT0002R	47.7667	16.7667	117	Inorganic	sulphate_total	pm25	15	0.356
AT0002R	47.7667	16.7667	117	Inorganic	sulphate_total	pm25	16	0.429
AT0002R	47.7667	16.7667	117	Inorganic	sulphate_total	pm25	17	0.252
AT0002R	47.7667	16.7667	117	Inorganic	sulphate_total	pm25	18	0.292
AT0002R	47.7667	16.7667	117	Inorganic	sulphate_total	pm25	19	0.271
AT0002R	47.7667	16.7667	117	Isoprene	isoprene	air	12	343
AT0002R	47.7667	16.7667	117	Isoprene	isoprene	air	13	1400
AT0002R	47.7667	16.7667	117	Isoprene	isoprene	air	14	1360
AT0002R	47.7667	16.7667	117	Isoprene	isoprene	air	15	687
AT0002R	47.7667	16.7667	117	Isoprene	isoprene	air	16	228
AT0002R	47.7667	16.7667	117	Isoprene	isoprene	air	17	707
AT0002R	47.7667	16.7667	117	Isoprene	isoprene	air	18	824
AT0002R	47.7667	16.7667	117	methanol	methanol	air	12	6024
AT0002R	47.7667	16.7667	117	methanol	methanol	air	13	5365
AT0002R	47.7667	16.7667	117	methanol	methanol	air	14	4975
AT0002R	47.7667	16.7667	117	methanol	methanol	air	15	4829
AT0002R	47.7667	16.7667	117	methanol	methanol	air	16	3618
AT0002R	47.7667	16.7667	117	methanol	methanol	air	17	2710
AT0002R	47.7667	16.7667	117	methanol	methanol	air	18	2550
AT0002R	47.7667	16.7667	117	Monoterpenes	3-carene	air	12	0.1912
AT0002R	47.7667	16.7667	117	Monoterpenes	3-carene	air	14	0.2943
AT0002R	47.7667	16.7667	117	Monoterpenes	3-carene	air	15	0.0883
AT0002R	47.7667	16.7667	117	Monoterpenes	3-carene	air	16	0.1766
AT0002R	47.7667	16.7667	117	Monoterpenes	3-carene	air	17	0
AT0002R	47.7667	16.7667	117	Monoterpenes	3-carene	air	18	0
AT0002R	47.7667	16.7667	117	Monoterpenes	alpha-pinene	air	12	2.1335
AT0002R	47.7667	16.7667	117	Monoterpenes	alpha-pinene	air	14	4.5907
AT0002R	47.7667	16.7667	117	Monoterpenes	alpha-pinene	air	15	1.3684
AT0002R	47.7667	16.7667	117	Monoterpenes	alpha-pinene	air	16	3.2518
AT0002R	47.7667	16.7667	117	Monoterpenes	alpha-pinene	air	17	1.1623
AT0002R	47.7667	16.7667	117	Monoterpenes	alpha-pinene	air	18	0.1471
AT0002R	47.7667	16.7667	117	Monoterpenes	beta-pinene	air	12	2.1042
AT0002R	47.7667	16.7667	117	Monoterpenes	beta-pinene	air	14	1.8981
AT0002R	47.7667	16.7667	117	Monoterpenes	beta-pinene	air	15	1.2506
AT0002R	47.7667	16.7667	117	Monoterpenes	beta-pinene	air	16	1.1477
AT0002R	47.7667	16.7667	117	Monoterpenes	beta-pinene	air	17	5.915
AT0002R	47.7667	16.7667	117	Monoterpenes	beta-pinene	air	18	1.236
AT0002R	47.7667	16.7667	117	Monoterpenes	camphene	air	12	0.4709
AT0002R	47.7667	16.7667	117	Monoterpenes	camphene	air	14	0.6326
AT0002R	47.7667	16.7667	117	Monoterpenes	camphene	air	15	0.1471
AT0002R	47.7667	16.7667	117	Monoterpenes	camphene	air	16	0.2795
AT0002R	47.7667	16.7667	117	Monoterpenes	camphene	air	17	0.1766
AT0002R	47.7667	16.7667	117	Monoterpenes	camphene	air	18	1.133
AT0002R	47.7667	16.7667	117	Monoterpenes	eucalyptol	air	12	3.31338
AT0002R	47.7667	16.7667	117	Monoterpenes	eucalyptol	air	14	15.6368
AT0002R	47.7667	16.7667	117	Monoterpenes	eucalyptol	air	15	3.56043
AT0002R	47.7667	16.7667	117	Monoterpenes	eucalyptol	air	16	6.19078
AT0002R	47.7667	16.7667	117	Monoterpenes	eucalyptol	air	17	1.9328
AT0002R	47.7667	16.7667	117	Monoterpenes	eucalyptol	air	18	0.770214
AT0002R	47.7667	16.7667	117	Monoterpenes	limonene	air	12	1.1772
AT0002R	47.7667	16.7667	117	Monoterpenes	limonene	air	14	1.0299
AT0002R	47.7667	16.7667	117	Monoterpenes	limonene	air	15	0.6326
AT0002R	47.7667	16.7667	117	Monoterpenes	limonene	air	16	1.0594
AT0002R	47.7667	16.7667	117	Monoterpenes	limonene	air	17	1.7069
AT0002R	47.7667	16.7667	117	Monoterpenes	limonene	air	18	1.0889
AT0002R	47.7667	16.7667	117	Monoterpenes	myrcene	air	12	0.7651
AT0002R	47.7667	16.7667	117	Monoterpenes	myrcene	air	14	0
AT0002R	47.7667	16.7667	117	Monoterpenes	myrcene	air	15	0.309
AT0002R	47.7667	16.7667	117	Monoterpenes	myrcene	air	16	0.3531
AT0002R	47.7667	16.7667	117	Monoterpenes	myrcene	air	17	0
AT0002R	47.7667	16.7667	117	Monoterpenes	myrcene	air	18	0
AT0002R	47.7667	16.7667	117	Monoterpenes	p-cymene	air	12	0.5825
AT0002R	47.7667	16.7667	117	Monoterpenes	p-cymene	air	14	0.7916
AT0002R	47.7667	16.7667	117	Monoterpenes	p-cymene	air	15	0.4929
AT0002R	47.7667	16.7667	117	Monoterpenes	p-cymene	air	16	0.4181
AT0002R	47.7667	16.7667	117	Monoterpenes	p-cymene	air	17	0.4032
AT0002R	47.7667	16.7667	117	Monoterpenes	p-cymene	air	18	3.6889
AT0002R	47.7667	16.7667	117	Monoterpenes	sabinene	air	12	0.3975
AT0002R	47.7667	16.7667	117	Monoterpenes	sabinene	air	14	1.6468
AT0002R	47.7667	16.7667	117	Monoterpenes	sabinene	air	15	1.4766
AT0002R	47.7667	16.7667	117	Monoterpenes	sabinene	air	16	2.1769
AT0002R	47.7667	16.7667	117	Monoterpenes	sabinene	air	17	1.7226
AT0002R	47.7667	16.7667	117	Monoterpenes	sabinene	air	18	2.1769
AT0002R	47.7667	16.7667	117	NMHC (C2-C6)	2-methylbutane	air	12	16
AT0002R	47.7667	16.7667	117	NMHC (C2-C6)	2-methylbutane	air	13	43
AT0002R	47.7667	16.7667	117	NMHC (C2-C6)	2-methylbutane	air	14	27
AT0002R	47.7667	16.7667	117	NMHC (C2-C6)	2-methylbutane	air	15	57
AT0002R	47.7667	16.7667	117	NMHC (C2-C6)	2-methylbutane	air	16	16
AT0002R	47.7667	16.7667	117	NMHC (C2-C6)	2-methylbutane	air	17	16
AT0002R	47.7667	16.7667	117	NMHC (C2-C6)	2-methylbutane	air	18	108
AT0002R	47.7667	16.7667	117	NMHC (C2-C6)	2-methylpentane	air	12
AT0002R	47.7667	16.7667	117	NMHC (C2-C6)	2-methylpentane	air	13
AT0002R	47.7667	16.7667	117	NMHC (C2-C6)	2-methylpentane	air	14
AT0002R	47.7667	16.7667	117	NMHC (C2-C6)	2-methylpentane	air	15
AT0002R	47.7667	16.7667	117	NMHC (C2-C6)	2-methylpentane	air	16
AT0002R	47.7667	16.7667	117	NMHC (C2-C6)	2-methylpentane	air	17
AT0002R	47.7667	16.7667	117	NMHC (C2-C6)	2-methylpentane	air	18
AT0002R	47.7667	16.7667	117	NMHC (C2-C6)	2-methylpropane	air	12	30
AT0002R	47.7667	16.7667	117	NMHC (C2-C6)	2-methylpropane	air	13	30
AT0002R	47.7667	16.7667	117	NMHC (C2-C6)	2-methylpropane	air	14	32
AT0002R	47.7667	16.7667	117	NMHC (C2-C6)	2-methylpropane	air	15	19
AT0002R	47.7667	16.7667	117	NMHC (C2-C6)	2-methylpropane	air	16	92
AT0002R	47.7667	16.7667	117	NMHC (C2-C6)	2-methylpropane	air	17	38
AT0002R	47.7667	16.7667	117	NMHC (C2-C6)	2-methylpropane	air	18	71
AT0002R	47.7667	16.7667	117	NMHC (C2-C6)	3-methylpentane	air	12	31
AT0002R	47.7667	16.7667	117	NMHC (C2-C6)	3-methylpentane	air	13	52
AT0002R	47.7667	16.7667	117	NMHC (C2-C6)	3-methylpentane	air	14	58
AT0002R	47.7667	16.7667	117	NMHC (C2-C6)	3-methylpentane	air	15	44
AT0002R	47.7667	16.7667	117	NMHC (C2-C6)	3-methylpentane	air	16	57
AT0002R	47.7667	16.7667	117	NMHC (C2-C6)	3-methylpentane	air	17	31
AT0002R	47.7667	16.7667	117	NMHC (C2-C6)	3-methylpentane	air	18	56
AT0002R	47.7667	16.7667	117	NMHC (C2-C6)	ethane	air	12	1042
AT0002R	47.7667	16.7667	117	NMHC (C2-C6)	ethane	air	13	1314
AT0002R	47.7667	16.7667	117	NMHC (C2-C6)	ethane	air	14	899
AT0002R	47.7667	16.7667	117	NMHC (C2-C6)	ethane	air	15	1483
AT0002R	47.7667	16.7667	117	NMHC (C2-C6)	ethane	air	16	1248
AT0002R	47.7667	16.7667	117	NMHC (C2-C6)	ethane	air	17	1348
AT0002R	47.7667	16.7667	117	NMHC (C2-C6)	ethane	air	18	1687
AT0002R	47.7667	16.7667	117	NMHC (C2-C6)	ethene	air	12	609
AT0002R	47.7667	16.7667	117	NMHC (C2-C6)	ethene	air	13	821
AT0002R	47.7667	16.7667	117	NMHC (C2-C6)	ethene	air	14	696
AT0002R	47.7667	16.7667	117	NMHC (C2-C6)	ethene	air	15	924
AT0002R	47.7667	16.7667	117	NMHC (C2-C6)	ethene	air	16	620
AT0002R	47.7667	16.7667	117	NMHC (C2-C6)	ethene	air	17	613
AT0002R	47.7667	16.7667	117	NMHC (C2-C6)	ethene	air	18	664
AT0002R	47.7667	16.7667	117	NMHC (C2-C6)	ethyne	air	12	49
AT0002R	47.7667	16.7667	117	NMHC (C2-C6)	ethyne	air	13	130
AT0002R	47.7667	16.7667	117	NMHC (C2-C6)	ethyne	air	14	106
AT0002R	47.7667	16.7667	117	NMHC (C2-C6)	ethyne	air	15	190
AT0002R	47.7667	16.7667	117	NMHC (C2-C6)	ethyne	air	16	38
AT0002R	47.7667	16.7667	117	NMHC (C2-C6)	ethyne	air	17	109
AT0002R	47.7667	16.7667	117	NMHC (C2-C6)	ethyne	air	18	93
AT0002R	47.7667	16.7667	117	NMHC (C2-C6)	n-butane	air	12
AT0002R	47.7667	16.7667	117	NMHC (C2-C6)	n-butane	air	13	79
AT0002R	47.7667	16.7667	117	NMHC (C2-C6)	n-butane	air	14	59
AT0002R	47.7667	16.7667	117	NMHC (C2-C6)	n-butane	air	15	75
AT0002R	47.7667	16.7667	117	NMHC (C2-C6)	n-butane	air	16	133
AT0002R	47.7667	16.7667	117	NMHC (C2-C6)	n-butane	air	17	73
AT0002R	47.7667	16.7667	117	NMHC (C2-C6)	n-butane	air	18	185
AT0002R	47.7667	16.7667	117	NMHC (C2-C6)	n-hexane	air	12	30
AT0002R	47.7667	16.7667	117	NMHC (C2-C6)	n-hexane	air	13	43
AT0002R	47.7667	16.7667	117	NMHC (C2-C6)	n-hexane	air	14	27
AT0002R	47.7667	16.7667	117	NMHC (C2-C6)	n-hexane	air	15	17
AT0002R	47.7667	16.7667	117	NMHC (C2-C6)	n-hexane	air	16	37
AT0002R	47.7667	16.7667	117	NMHC (C2-C6)	n-hexane	air	17	38
AT0002R	47.7667	16.7667	117	NMHC (C2-C6)	n-hexane	air	18	61
AT0002R	47.7667	16.7667	117	NMHC (C2-C6)	n-pentane	air	12	55
AT0002R	47.7667	16.7667	117	NMHC (C2-C6)	n-pentane	air	13	139
AT0002R	47.7667	16.7667	117	NMHC (C2-C6)	n-pentane	air	14	67
AT0002R	47.7667	16.7667	117	NMHC (C2-C6)	n-pentane	air	15	84
AT0002R	47.7667	16.7667	117	NMHC (C2-C6)	n-pentane	air	16	113
AT0002R	47.7667	16.7667	117	NMHC (C2-C6)	n-pentane	air	17	90
AT0002R	47.7667	16.7667	117	NMHC (C2-C6)	n-pentane	air	18	151
AT0002R	47.7667	16.7667	117	NMHC (C2-C6)	propane	air	12	91
AT0002R	47.7667	16.7667	117	NMHC (C2-C6)	propane	air	13	215
AT0002R	47.7667	16.7667	117	NMHC (C2-C6)	propane	air	14	129
AT0002R	47.7667	16.7667	117	NMHC (C2-C6)	propane	air	15	231
AT0002R	47.7667	16.7667	117	NMHC (C2-C6)	propane	air	16	288
AT0002R	47.7667	16.7667	117	NMHC (C2-C6)	propane	air	17	229
AT0002R	47.7667	16.7667	117	NMHC (C2-C6)	propane	air	18	435
AT0002R	47.7667	16.7667	117	NMHC (C2-C6)	propene	air	12	157
AT0002R	47.7667	16.7667	117	NMHC (C2-C6)	propene	air	13	118
AT0002R	47.7667	16.7667	117	NMHC (C2-C6)	propene	air	14	107
AT0002R	47.7667	16.7667	117	NMHC (C2-C6)	propene	air	15	184
AT0002R	47.7667	16.7667	117	NMHC (C2-C6)	propene	air	16	73
AT0002R	47.7667	16.7667	117	NMHC (C2-C6)	propene	air	17	131
AT0002R	47.7667	16.7667	117	NMHC (C2-C6)	propene	air	18	75
AT0002R	47.7667	16.7667	117	NMHC (C2-C6)	propyne	air	12	59
AT0002R	47.7667	16.7667	117	NMHC (C2-C6)	propyne	air	13	54
AT0002R	47.7667	16.7667	117	NMHC (C2-C6)	propyne	air	14	87
AT0002R	47.7667	16.7667	117	NMHC (C2-C6)	propyne	air	15	74
AT0002R	47.7667	16.7667	117	NMHC (C2-C6)	propyne	air	16	42
AT0002R	47.7667	16.7667	117	NMHC (C2-C6)	propyne	air	17	95
AT0002R	47.7667	16.7667	117	NMHC (C2-C6)	propyne	air	18	104
AT0002R	47.7667	16.7667	117	NMHC (C7-C12)	n-decane	air	12	2.9586
AT0002R	47.7667	16.7667	117	NMHC (C7-C12)	n-decane	air	14	77.0639
AT0002R	47.7667	16.7667	117	NMHC (C7-C12)	n-decane	air	15	12.1161
AT0002R	47.7667	16.7667	117	NMHC (C7-C12)	n-decane	air	16	5.2127
AT0002R	47.7667	16.7667	117	NMHC (C7-C12)	n-decane	air	17	5.7763
AT0002R	47.7667	16.7667	117	NMHC (C7-C12)	n-decane	air	18	0.2818
AT0002R	47.7667	16.7667	117	NMHC (C7-C12)	n-dodecane	air	12	4.0011
AT0002R	47.7667	16.7667	117	NMHC (C7-C12)	n-dodecane	air	14	12.9451
AT0002R	47.7667	16.7667	117	NMHC (C7-C12)	n-dodecane	air	15	4.3542
AT0002R	47.7667	16.7667	117	NMHC (C7-C12)	n-dodecane	air	16	13.4157
AT0002R	47.7667	16.7667	117	NMHC (C7-C12)	n-dodecane	air	17	5.0603
AT0002R	47.7667	16.7667	117	NMHC (C7-C12)	n-dodecane	air	18	0.9415
AT0002R	47.7667	16.7667	117	NMHC (C7-C12)	n-nonane	air	12	8.4398
AT0002R	47.7667	16.7667	117	NMHC (C7-C12)	n-nonane	air	14	25.7883
AT0002R	47.7667	16.7667	117	NMHC (C7-C12)	n-nonane	air	15	34.2281
AT0002R	47.7667	16.7667	117	NMHC (C7-C12)	n-nonane	air	16	26.4134
AT0002R	47.7667	16.7667	117	NMHC (C7-C12)	n-nonane	air	17	44.6996
AT0002R	47.7667	16.7667	117	NMHC (C7-C12)	n-nonane	air	18	0.6251
AT0002R	47.7667	16.7667	117	NMHC (C7-C12)	n-octane	air	12	30.4816
AT0002R	47.7667	16.7667	117	NMHC (C7-C12)	n-octane	air	14	71.9836
AT0002R	47.7667	16.7667	117	NMHC (C7-C12)	n-octane	air	15	38.5715
AT0002R	47.7667	16.7667	117	NMHC (C7-C12)	n-octane	air	16	47.1877
AT0002R	47.7667	16.7667	117	NMHC (C7-C12)	n-octane	air	17	46.4332
AT0002R	47.7667	16.7667	117	NMHC (C7-C12)	n-octane	air	18	61.0159
AT0002R	47.7667	16.7667	117	NMHC (C7-C12)	n-undecane	air	12	3.3344
AT0002R	47.7667	16.7667	117	NMHC (C7-C12)	n-undecane	air	14	33.343
AT0002R	47.7667	16.7667	117	NMHC (C7-C12)	n-undecane	air	15	4.6167
AT0002R	47.7667	16.7667	117	NMHC (C7-C12)	n-undecane	air	16	3.3344
AT0002R	47.7667	16.7667	117	NMHC (C7-C12)	n-undecane	air	17	2.9496
AT0002R	47.7667	16.7667	117	NMHC (C7-C12)	n-undecane	air	18	1.026
AT0002R	47.7667	16.7667	117	NO2	nitrogen_dioxide	air	12	1.28
AT0002R	47.7667	16.7667	117	NO2	nitrogen_dioxide	air	13	1.19
AT0002R	47.7667	16.7667	117	NO2	nitrogen_dioxide	air	14	1.06
AT0002R	47.7667	16.7667	117	NO2	nitrogen_dioxide	air	15	1.16
AT0002R	47.7667	16.7667	117	NO2	nitrogen_dioxide	air	16	1.25
AT0002R	47.7667	16.7667	117	NO2	nitrogen_dioxide	air	17	1.12
AT0002R	47.7667	16.7667	117	NO2	nitrogen_dioxide	air	18	1.88
AT0002R	47.7667	16.7667	117	NO2	nitrogen_dioxide	air	19	1.82
AT0002R	47.7667	16.7667	117	O3max	ozone	air	12	93.6
AT0002R	47.7667	16.7667	117	O3max	ozone	air	13	114.8
AT0002R	47.7667	16.7667	117	O3max	ozone	air	14	128.4
AT0002R	47.7667	16.7667	117	O3max	ozone	air	15	104.2
AT0002R	47.7667	16.7667	117	O3max	ozone	air	16	115.7
AT0002R	47.7667	16.7667	117	O3max	ozone	air	17	109.9
AT0002R	47.7667	16.7667	117	O3max	ozone	air	18	131.4
AT0002R	47.7667	16.7667	117	O3max	ozone	air	19	142.8
AT0002R	47.7667	16.7667	117	Organic_acid	2-ketobutyric_acid	pm25	12	0.008
AT0002R	47.7667	16.7667	117	Organic_acid	2-ketobutyric_acid	pm25	13	0.22
AT0002R	47.7667	16.7667	117	Organic_acid	2-ketobutyric_acid	pm25	14	0.22
AT0002R	47.7667	16.7667	117	Organic_acid	2-ketobutyric_acid	pm25	15	0.22
AT0002R	47.7667	16.7667	117	Organic_acid	2-ketobutyric_acid	pm25	16	0.22
AT0002R	47.7667	16.7667	117	Organic_acid	2-ketobutyric_acid	pm25	17	0.22
AT0002R	47.7667	16.7667	117	Organic_acid	2-ketobutyric_acid	pm25	18	0.22
AT0002R	47.7667	16.7667	117	Organic_acid	2-ketobutyric_acid	pm25	19	0.22
AT0002R	47.7667	16.7667	117	Organic_acid	3-hydroxybutyric_acid	pm25	12	2.43
AT0002R	47.7667	16.7667	117	Organic_acid	3-hydroxybutyric_acid	pm25	13	2.09
AT0002R	47.7667	16.7667	117	Organic_acid	3-hydroxybutyric_acid	pm25	14	1.47
AT0002R	47.7667	16.7667	117	Organic_acid	3-hydroxybutyric_acid	pm25	15	1.47
AT0002R	47.7667	16.7667	117	Organic_acid	3-hydroxybutyric_acid	pm25	16	1.47
AT0002R	47.7667	16.7667	117	Organic_acid	3-hydroxybutyric_acid	pm25	17	1.47
AT0002R	47.7667	16.7667	117	Organic_acid	3-hydroxybutyric_acid	pm25	18	1.47
AT0002R	47.7667	16.7667	117	Organic_acid	3-hydroxybutyric_acid	pm25	19	2.07
AT0002R	47.7667	16.7667	117	Organic_acid	4-hydroxybenzoic_acid	pm25	12	0.007
AT0002R	47.7667	16.7667	117	Organic_acid	4-hydroxybenzoic_acid	pm25	13	0.007
AT0002R	47.7667	16.7667	117	Organic_acid	4-hydroxybenzoic_acid	pm25	14	0.007
AT0002R	47.7667	16.7667	117	Organic_acid	4-hydroxybenzoic_acid	pm25	15	0.007
AT0002R	47.7667	16.7667	117	Organic_acid	4-hydroxybenzoic_acid	pm25	16	0.007
AT0002R	47.7667	16.7667	117	Organic_acid	4-hydroxybenzoic_acid	pm25	17	0.007
AT0002R	47.7667	16.7667	117	Organic_acid	4-hydroxybenzoic_acid	pm25	18	0.007
AT0002R	47.7667	16.7667	117	Organic_acid	4-hydroxybenzoic_acid	pm25	19	0.007
AT0002R	47.7667	16.7667	117	Organic_acid	4-methylphthalic_acid	pm25	12	0.26
AT0002R	47.7667	16.7667	117	Organic_acid	4-methylphthalic_acid	pm25	13	0.23
AT0002R	47.7667	16.7667	117	Organic_acid	4-methylphthalic_acid	pm25	14	0.22
AT0002R	47.7667	16.7667	117	Organic_acid	4-methylphthalic_acid	pm25	15	0.34
AT0002R	47.7667	16.7667	117	Organic_acid	4-methylphthalic_acid	pm25	16	0.24
AT0002R	47.7667	16.7667	117	Organic_acid	4-methylphthalic_acid	pm25	17	0.24
AT0002R	47.7667	16.7667	117	Organic_acid	4-methylphthalic_acid	pm25	18	0.3
AT0002R	47.7667	16.7667	117	Organic_acid	4-methylphthalic_acid	pm25	19	0.33
AT0002R	47.7667	16.7667	117	Organic_acid	4-oxoheptanoic_acid	pm25	12	7.99
AT0002R	47.7667	16.7667	117	Organic_acid	4-oxoheptanoic_acid	pm25	13	10.35
AT0002R	47.7667	16.7667	117	Organic_acid	4-oxoheptanoic_acid	pm25	14	13.58
AT0002R	47.7667	16.7667	117	Organic_acid	4-oxoheptanoic_acid	pm25	15	8.61
AT0002R	47.7667	16.7667	117	Organic_acid	4-oxoheptanoic_acid	pm25	16	7.85
AT0002R	47.7667	16.7667	117	Organic_acid	4-oxoheptanoic_acid	pm25	17	5.61
AT0002R	47.7667	16.7667	117	Organic_acid	4-oxoheptanoic_acid	pm25	18	8.9
AT0002R	47.7667	16.7667	117	Organic_acid	4-oxoheptanoic_acid	pm25	19	12.19
AT0002R	47.7667	16.7667	117	Organic_acid	adipic_acid	pm25	12	1.88
AT0002R	47.7667	16.7667	117	Organic_acid	adipic_acid	pm25	13	1.17
AT0002R	47.7667	16.7667	117	Organic_acid	adipic_acid	pm25	14	1.03
AT0002R	47.7667	16.7667	117	Organic_acid	adipic_acid	pm25	15	1.62
AT0002R	47.7667	16.7667	117	Organic_acid	adipic_acid	pm25	16	1.25
AT0002R	47.7667	16.7667	117	Organic_acid	adipic_acid	pm25	17	1.47
AT0002R	47.7667	16.7667	117	Organic_acid	adipic_acid	pm25	18	1.77
AT0002R	47.7667	16.7667	117	Organic_acid	adipic_acid	pm25	19	1.73
AT0002R	47.7667	16.7667	117	Organic_acid	azelaic_acid	pm25	12	1.84
AT0002R	47.7667	16.7667	117	Organic_acid	azelaic_acid	pm25	13	1.84
AT0002R	47.7667	16.7667	117	Organic_acid	azelaic_acid	pm25	14	1.49
AT0002R	47.7667	16.7667	117	Organic_acid	azelaic_acid	pm25	15	1.18
AT0002R	47.7667	16.7667	117	Organic_acid	azelaic_acid	pm25	16	1.14
AT0002R	47.7667	16.7667	117	Organic_acid	azelaic_acid	pm25	17	1.04
AT0002R	47.7667	16.7667	117	Organic_acid	azelaic_acid	pm25	18	1.59
AT0002R	47.7667	16.7667	117	Organic_acid	azelaic_acid	pm25	19	1.98
AT0002R	47.7667	16.7667	117	Organic_acid	benzoic_acid	pm25	12	0.265
AT0002R	47.7667	16.7667	117	Organic_acid	benzoic_acid	pm25	13	0.265
AT0002R	47.7667	16.7667	117	Organic_acid	benzoic_acid	pm25	14	0.265
AT0002R	47.7667	16.7667	117	Organic_acid	benzoic_acid	pm25	15	0.265
AT0002R	47.7667	16.7667	117	Organic_acid	benzoic_acid	pm25	16	0.265
AT0002R	47.7667	16.7667	117	Organic_acid	benzoic_acid	pm25	17	0.265
AT0002R	47.7667	16.7667	117	Organic_acid	benzoic_acid	pm25	18	0.265
AT0002R	47.7667	16.7667	117	Organic_acid	benzoic_acid	pm25	19	0.265
AT0002R	47.7667	16.7667	117	Organic_acid	caproic_acid	pm25	12	1.355
AT0002R	47.7667	16.7667	117	Organic_acid	caproic_acid	pm25	13	1.355
AT0002R	47.7667	16.7667	117	Organic_acid	caproic_acid	pm25	14	1.355
AT0002R	47.7667	16.7667	117	Organic_acid	caproic_acid	pm25	15	1.355
AT0002R	47.7667	16.7667	117	Organic_acid	caproic_acid	pm25	16	1.355
AT0002R	47.7667	16.7667	117	Organic_acid	caproic_acid	pm25	17	1.355
AT0002R	47.7667	16.7667	117	Organic_acid	caproic_acid	pm25	18	1.355
AT0002R	47.7667	16.7667	117	Organic_acid	caproic_acid	pm25	19	1.355
AT0002R	47.7667	16.7667	117	Organic_acid	cis-pinonic_acid	pm25	12	24.48
AT0002R	47.7667	16.7667	117	Organic_acid	cis-pinonic_acid	pm25	13	33.71
AT0002R	47.7667	16.7667	117	Organic_acid	cis-pinonic_acid	pm25	14	15.74
AT0002R	47.7667	16.7667	117	Organic_acid	cis-pinonic_acid	pm25	15	13.48
AT0002R	47.7667	16.7667	117	Organic_acid	cis-pinonic_acid	pm25	16	23.69
AT0002R	47.7667	16.7667	117	Organic_acid	cis-pinonic_acid	pm25	17	16.33
AT0002R	47.7667	16.7667	117	Organic_acid	cis-pinonic_acid	pm25	18	31.63
AT0002R	47.7667	16.7667	117	Organic_acid	cis-pinonic_acid	pm25	19	20.82
AT0002R	47.7667	16.7667	117	Organic_acid	citraconic_acid	pm25	12	0.18
AT0002R	47.7667	16.7667	117	Organic_acid	citraconic_acid	pm25	13	0.18
AT0002R	47.7667	16.7667	117	Organic_acid	citraconic_acid	pm25	14	0.18
AT0002R	47.7667	16.7667	117	Organic_acid	citraconic_acid	pm25	15	0.18
AT0002R	47.7667	16.7667	117	Organic_acid	citraconic_acid	pm25	16	0.18
AT0002R	47.7667	16.7667	117	Organic_acid	citraconic_acid	pm25	17	0.18
AT0002R	47.7667	16.7667	117	Organic_acid	citraconic_acid	pm25	18	0.18
AT0002R	47.7667	16.7667	117	Organic_acid	citraconic_acid	pm25	19	0.18
AT0002R	47.7667	16.7667	117	Organic_acid	citric_acid	pm25	12	1.55
AT0002R	47.7667	16.7667	117	Organic_acid	citric_acid	pm25	13	1.34
AT0002R	47.7667	16.7667	117	Organic_acid	citric_acid	pm25	14	2.35
AT0002R	47.7667	16.7667	117	Organic_acid	citric_acid	pm25	15	1.61
AT0002R	47.7667	16.7667	117	Organic_acid	citric_acid	pm25	16	1.38
AT0002R	47.7667	16.7667	117	Organic_acid	citric_acid	pm25	17	1.16
AT0002R	47.7667	16.7667	117	Organic_acid	citric_acid	pm25	18	1.63
AT0002R	47.7667	16.7667	117	Organic_acid	citric_acid	pm25	19	1.77
AT0002R	47.7667	16.7667	117	Organic_acid	gluconic_acid	pm25	12	0.31
AT0002R	47.7667	16.7667	117	Organic_acid	gluconic_acid	pm25	13	0.62
AT0002R	47.7667	16.7667	117	Organic_acid	gluconic_acid	pm25	14	0.46
AT0002R	47.7667	16.7667	117	Organic_acid	gluconic_acid	pm25	15	0.82
AT0002R	47.7667	16.7667	117	Organic_acid	gluconic_acid	pm25	16	0.63
AT0002R	47.7667	16.7667	117	Organic_acid	gluconic_acid	pm25	17	0.51
AT0002R	47.7667	16.7667	117	Organic_acid	gluconic_acid	pm25	18	0.41
AT0002R	47.7667	16.7667	117	Organic_acid	gluconic_acid	pm25	19	0.46
AT0002R	47.7667	16.7667	117	Organic_acid	glutaric_acid	pm25	12	1.11
AT0002R	47.7667	16.7667	117	Organic_acid	glutaric_acid	pm25	13	1.1
AT0002R	47.7667	16.7667	117	Organic_acid	glutaric_acid	pm25	14	1.25
AT0002R	47.7667	16.7667	117	Organic_acid	glutaric_acid	pm25	15	1.8
AT0002R	47.7667	16.7667	117	Organic_acid	glutaric_acid	pm25	16	1.52
AT0002R	47.7667	16.7667	117	Organic_acid	glutaric_acid	pm25	17	1.58
AT0002R	47.7667	16.7667	117	Organic_acid	glutaric_acid	pm25	18	1.8
AT0002R	47.7667	16.7667	117	Organic_acid	glutaric_acid	pm25	19	1.93
AT0002R	47.7667	16.7667	117	Organic_acid	glycolic_acid	pm25	12	2.9
AT0002R	47.7667	16.7667	117	Organic_acid	glycolic_acid	pm25	13	4.19
AT0002R	47.7667	16.7667	117	Organic_acid	glycolic_acid	pm25	14	6.13
AT0002R	47.7667	16.7667	117	Organic_acid	glycolic_acid	pm25	15	4.85
AT0002R	47.7667	16.7667	117	Organic_acid	glycolic_acid	pm25	16	4.63
AT0002R	47.7667	16.7667	117	Organic_acid	glycolic_acid	pm25	17	3.36
AT0002R	47.7667	16.7667	117	Organic_acid	glycolic_acid	pm25	18	4.38
AT0002R	47.7667	16.7667	117	Organic_acid	glycolic_acid	pm25	19	6.11
AT0002R	47.7667	16.7667	117	Organic_acid	glyoxylic_acid	pm25	12	0.66
AT0002R	47.7667	16.7667	117	Organic_acid	glyoxylic_acid	pm25	13	0.435
AT0002R	47.7667	16.7667	117	Organic_acid	glyoxylic_acid	pm25	14	1.42
AT0002R	47.7667	16.7667	117	Organic_acid	glyoxylic_acid	pm25	15	2.49
AT0002R	47.7667	16.7667	117	Organic_acid	glyoxylic_acid	pm25	16	2.7
AT0002R	47.7667	16.7667	117	Organic_acid	glyoxylic_acid	pm25	17	1.73
AT0002R	47.7667	16.7667	117	Organic_acid	glyoxylic_acid	pm25	18	1.82
AT0002R	47.7667	16.7667	117	Organic_acid	glyoxylic_acid	pm25	19	3.17
AT0002R	47.7667	16.7667	117	Organic_acid	lactic_acid	pm25	12	2.12
AT0002R	47.7667	16.7667	117	Organic_acid	lactic_acid	pm25	13	1.81
AT0002R	47.7667	16.7667	117	Organic_acid	lactic_acid	pm25	14	1.115
AT0002R	47.7667	16.7667	117	Organic_acid	lactic_acid	pm25	15	1.115
AT0002R	47.7667	16.7667	117	Organic_acid	lactic_acid	pm25	16	2.26
AT0002R	47.7667	16.7667	117	Organic_acid	lactic_acid	pm25	17	1.115
AT0002R	47.7667	16.7667	117	Organic_acid	lactic_acid	pm25	18	1.115
AT0002R	47.7667	16.7667	117	Organic_acid	lactic_acid	pm25	19	1.115
AT0002R	47.7667	16.7667	117	Organic_acid	maleic_acid	pm25	12	0.72
AT0002R	47.7667	16.7667	117	Organic_acid	maleic_acid	pm25	13	0.86
AT0002R	47.7667	16.7667	117	Organic_acid	maleic_acid	pm25	14	1.32
AT0002R	47.7667	16.7667	117	Organic_acid	maleic_acid	pm25	15	0.86
AT0002R	47.7667	16.7667	117	Organic_acid	maleic_acid	pm25	16	0.75
AT0002R	47.7667	16.7667	117	Organic_acid	maleic_acid	pm25	17	0.61
AT0002R	47.7667	16.7667	117	Organic_acid	maleic_acid	pm25	18	0.98
AT0002R	47.7667	16.7667	117	Organic_acid	maleic_acid	pm25	19	0.87
AT0002R	47.7667	16.7667	117	Organic_acid	malic_acid	pm25	12	12.1
AT0002R	47.7667	16.7667	117	Organic_acid	malic_acid	pm25	13	19.62
AT0002R	47.7667	16.7667	117	Organic_acid	malic_acid	pm25	14	19.35
AT0002R	47.7667	16.7667	117	Organic_acid	malic_acid	pm25	15	21.2
AT0002R	47.7667	16.7667	117	Organic_acid	malic_acid	pm25	16	21.13
AT0002R	47.7667	16.7667	117	Organic_acid	malic_acid	pm25	17	9.93
AT0002R	47.7667	16.7667	117	Organic_acid	malic_acid	pm25	18	14.19
AT0002R	47.7667	16.7667	117	Organic_acid	malic_acid	pm25	19	12.62
AT0002R	47.7667	16.7667	117	Organic_acid	malonic_acid	pm25	12	12.58
AT0002R	47.7667	16.7667	117	Organic_acid	malonic_acid	pm25	13	12.66
AT0002R	47.7667	16.7667	117	Organic_acid	malonic_acid	pm25	14	18.31
AT0002R	47.7667	16.7667	117	Organic_acid	malonic_acid	pm25	15	17.66
AT0002R	47.7667	16.7667	117	Organic_acid	malonic_acid	pm25	16	15.14
AT0002R	47.7667	16.7667	117	Organic_acid	malonic_acid	pm25	17	14.58
AT0002R	47.7667	16.7667	117	Organic_acid	malonic_acid	pm25	18	18.92
AT0002R	47.7667	16.7667	117	Organic_acid	malonic_acid	pm25	19	18.55
AT0002R	47.7667	16.7667	117	Organic_acid	methanesulfonic_acid	pm25	12	39.05
AT0002R	47.7667	16.7667	117	Organic_acid	methanesulfonic_acid	pm25	13	25.65
AT0002R	47.7667	16.7667	117	Organic_acid	methanesulfonic_acid	pm25	14	20.66
AT0002R	47.7667	16.7667	117	Organic_acid	methanesulfonic_acid	pm25	15	43.9
AT0002R	47.7667	16.7667	117	Organic_acid	methanesulfonic_acid	pm25	16	43.17
AT0002R	47.7667	16.7667	117	Organic_acid	methanesulfonic_acid	pm25	17	38.14
AT0002R	47.7667	16.7667	117	Organic_acid	methanesulfonic_acid	pm25	18	33.82
AT0002R	47.7667	16.7667	117	Organic_acid	methanesulfonic_acid	pm25	19	26.43
AT0002R	47.7667	16.7667	117	Organic_acid	oxalic_acid	pm25	12	123.21
AT0002R	47.7667	16.7667	117	Organic_acid	oxalic_acid	pm25	13	132.31
AT0002R	47.7667	16.7667	117	Organic_acid	oxalic_acid	pm25	14	166.17
AT0002R	47.7667	16.7667	117	Organic_acid	oxalic_acid	pm25	15	160.88
AT0002R	47.7667	16.7667	117	Organic_acid	oxalic_acid	pm25	16	150.68
AT0002R	47.7667	16.7667	117	Organic_acid	oxalic_acid	pm25	17	120.01
AT0002R	47.7667	16.7667	117	Organic_acid	oxalic_acid	pm25	18	151.47
AT0002R	47.7667	16.7667	117	Organic_acid	oxalic_acid	pm25	19	187.51
AT0002R	47.7667	16.7667	117	Organic_acid	phthalic_acid	pm25	12	1.14
AT0002R	47.7667	16.7667	117	Organic_acid	phthalic_acid	pm25	13	1
AT0002R	47.7667	16.7667	117	Organic_acid	phthalic_acid	pm25	14	1.03
AT0002R	47.7667	16.7667	117	Organic_acid	phthalic_acid	pm25	15	1.52
AT0002R	47.7667	16.7667	117	Organic_acid	phthalic_acid	pm25	16	1.32
AT0002R	47.7667	16.7667	117	Organic_acid	phthalic_acid	pm25	17	1.13
AT0002R	47.7667	16.7667	117	Organic_acid	phthalic_acid	pm25	18	1.49
AT0002R	47.7667	16.7667	117	Organic_acid	phthalic_acid	pm25	19	1.55
AT0002R	47.7667	16.7667	117	Organic_acid	pimelic_acid	pm25	12	0.74
AT0002R	47.7667	16.7667	117	Organic_acid	pimelic_acid	pm25	13	0.58
AT0002R	47.7667	16.7667	117	Organic_acid	pimelic_acid	pm25	14	0.68
AT0002R	47.7667	16.7667	117	Organic_acid	pimelic_acid	pm25	15	0.68
AT0002R	47.7667	16.7667	117	Organic_acid	pimelic_acid	pm25	16	0.44
AT0002R	47.7667	16.7667	117	Organic_acid	pimelic_acid	pm25	17	0.53
AT0002R	47.7667	16.7667	117	Organic_acid	pimelic_acid	pm25	18	0.79
AT0002R	47.7667	16.7667	117	Organic_acid	pimelic_acid	pm25	19	0.97
AT0002R	47.7667	16.7667	117	Organic_acid	pinic_acid	pm25	12	68.83
AT0002R	47.7667	16.7667	117	Organic_acid	pinic_acid	pm25	13	131.63
AT0002R	47.7667	16.7667	117	Organic_acid	pinic_acid	pm25	14	66.27
AT0002R	47.7667	16.7667	117	Organic_acid	pinic_acid	pm25	15	27.39
AT0002R	47.7667	16.7667	117	Organic_acid	pinic_acid	pm25	16	33.67
AT0002R	47.7667	16.7667	117	Organic_acid	pinic_acid	pm25	17	14.5
AT0002R	47.7667	16.7667	117	Organic_acid	pinic_acid	pm25	18	101.52
AT0002R	47.7667	16.7667	117	Organic_acid	pinic_acid	pm25	19	65.06
AT0002R	47.7667	16.7667	117	Organic_acid	pyruvic_acid	pm25	12	1.65
AT0002R	47.7667	16.7667	117	Organic_acid	pyruvic_acid	pm25	13	1.98
AT0002R	47.7667	16.7667	117	Organic_acid	pyruvic_acid	pm25	14	2.69
AT0002R	47.7667	16.7667	117	Organic_acid	pyruvic_acid	pm25	15	2.69
AT0002R	47.7667	16.7667	117	Organic_acid	pyruvic_acid	pm25	16	2.41
AT0002R	47.7667	16.7667	117	Organic_acid	pyruvic_acid	pm25	17	0.31
AT0002R	47.7667	16.7667	117	Organic_acid	pyruvic_acid	pm25	18	2.24
AT0002R	47.7667	16.7667	117	Organic_acid	pyruvic_acid	pm25	19	2.93
AT0002R	47.7667	16.7667	117	Organic_acid	sebacic_acid	pm25	12	2.08
AT0002R	47.7667	16.7667	117	Organic_acid	sebacic_acid	pm25	13	2.62
AT0002R	47.7667	16.7667	117	Organic_acid	sebacic_acid	pm25	14	3.83
AT0002R	47.7667	16.7667	117	Organic_acid	sebacic_acid	pm25	15	1.63
AT0002R	47.7667	16.7667	117	Organic_acid	sebacic_acid	pm25	16	1.59
AT0002R	47.7667	16.7667	117	Organic_acid	sebacic_acid	pm25	17	1.51
AT0002R	47.7667	16.7667	117	Organic_acid	sebacic_acid	pm25	18	1.72
AT0002R	47.7667	16.7667	117	Organic_acid	sebacic_acid	pm25	19	2.68
AT0002R	47.7667	16.7667	117	Organic_acid	suberic_acid	pm25	12	3.98
AT0002R	47.7667	16.7667	117	Organic_acid	suberic_acid	pm25	13	5.85
AT0002R	47.7667	16.7667	117	Organic_acid	suberic_acid	pm25	14	7.55
AT0002R	47.7667	16.7667	117	Organic_acid	suberic_acid	pm25	15	4.47
AT0002R	47.7667	16.7667	117	Organic_acid	suberic_acid	pm25	16	3.92
AT0002R	47.7667	16.7667	117	Organic_acid	suberic_acid	pm25	17	3.36
AT0002R	47.7667	16.7667	117	Organic_acid	suberic_acid	pm25	18	5.73
AT0002R	47.7667	16.7667	117	Organic_acid	suberic_acid	pm25	19	8.25
AT0002R	47.7667	16.7667	117	Organic_acid	succinic_acid	pm25	12	2.4
AT0002R	47.7667	16.7667	117	Organic_acid	succinic_acid	pm25	13	3.11
AT0002R	47.7667	16.7667	117	Organic_acid	succinic_acid	pm25	14	5.15
AT0002R	47.7667	16.7667	117	Organic_acid	succinic_acid	pm25	15	4.27
AT0002R	47.7667	16.7667	117	Organic_acid	succinic_acid	pm25	16	3.67
AT0002R	47.7667	16.7667	117	Organic_acid	succinic_acid	pm25	17	2.64
AT0002R	47.7667	16.7667	117	Organic_acid	succinic_acid	pm25	18	4
AT0002R	47.7667	16.7667	117	Organic_acid	succinic_acid	pm25	19	3.86
AT0002R	47.7667	16.7667	117	Organic_acid	tartaric_acid	pm25	12	2.39
AT0002R	47.7667	16.7667	117	Organic_acid	tartaric_acid	pm25	13	3.6
AT0002R	47.7667	16.7667	117	Organic_acid	tartaric_acid	pm25	14	4.79
AT0002R	47.7667	16.7667	117	Organic_acid	tartaric_acid	pm25	15	4.12
AT0002R	47.7667	16.7667	117	Organic_acid	tartaric_acid	pm25	16	5.41
AT0002R	47.7667	16.7667	117	Organic_acid	tartaric_acid	pm25	17	3.14
AT0002R	47.7667	16.7667	117	Organic_acid	tartaric_acid	pm25	18	3.83
AT0002R	47.7667	16.7667	117	Organic_acid	tartaric_acid	pm25	19	5.59
AT0002R	47.7667	16.7667	117	O-VOCs	2-methylpropenal	air	12	37.7385
AT0002R	47.7667	16.7667	117	O-VOCs	2-methylpropenal	air	13	44.7744
AT0002R	47.7667	16.7667	117	O-VOCs	2-methylpropenal	air	14	78.6751
AT0002R	47.7667	16.7667	117	O-VOCs	2-methylpropenal	air	15	55.0086
AT0002R	47.7667	16.7667	117	O-VOCs	2-methylpropenal	air	16	62.6842
AT0002R	47.7667	16.7667	117	O-VOCs	2-methylpropenal	air	17	57.8869
AT0002R	47.7667	16.7667	117	O-VOCs	2-methylpropenal	air	18	56.6077
AT0002R	47.7667	16.7667	117	O-VOCs	2-methylpropenal	air	19
AT0002R	47.7667	16.7667	117	O-VOCs	2-oxopropanal	air	12	300.796
AT0002R	47.7667	16.7667	117	O-VOCs	2-oxopropanal	air	13	325.059
AT0002R	47.7667	16.7667	117	O-VOCs	2-oxopropanal	air	14	272.801
AT0002R	47.7667	16.7667	117	O-VOCs	2-oxopropanal	air	15	243.25
AT0002R	47.7667	16.7667	117	O-VOCs	2-oxopropanal	air	16	230.807
AT0002R	47.7667	16.7667	117	O-VOCs	2-oxopropanal	air	17	158.952
AT0002R	47.7667	16.7667	117	O-VOCs	2-oxopropanal	air	18	127.224
AT0002R	47.7667	16.7667	117	O-VOCs	2-oxopropanal	air	19
AT0002R	47.7667	16.7667	117	O-VOCs	3-buten-2-one	air	12	99.1434
AT0002R	47.7667	16.7667	117	O-VOCs	3-buten-2-one	air	13	118.013
AT0002R	47.7667	16.7667	117	O-VOCs	3-buten-2-one	air	14	231.548
AT0002R	47.7667	16.7667	117	O-VOCs	3-buten-2-one	air	15	117.053
AT0002R	47.7667	16.7667	117	O-VOCs	3-buten-2-one	air	16	122.81
AT0002R	47.7667	16.7667	117	O-VOCs	3-buten-2-one	air	17	139.44
AT0002R	47.7667	16.7667	117	O-VOCs	3-buten-2-one	air	18	122.17
AT0002R	47.7667	16.7667	117	O-VOCs	3-buten-2-one	air	19
AT0002R	47.7667	16.7667	117	O-VOCs	butanone	air	12	61.9227
AT0002R	47.7667	16.7667	117	O-VOCs	butanone	air	13	111.742
AT0002R	47.7667	16.7667	117	O-VOCs	butanone	air	14	79.3736
AT0002R	47.7667	16.7667	117	O-VOCs	butanone	air	15	76.8404
AT0002R	47.7667	16.7667	117	O-VOCs	butanone	air	16	143.548
AT0002R	47.7667	16.7667	117	O-VOCs	butanone	air	17	73.4628
AT0002R	47.7667	16.7667	117	O-VOCs	butanone	air	18	83.3141
AT0002R	47.7667	16.7667	117	O-VOCs	butanone	air	19
AT0002R	47.7667	16.7667	117	O-VOCs	ethanal	air	12	447.791
AT0002R	47.7667	16.7667	117	O-VOCs	ethanal	air	13	577.548
AT0002R	47.7667	16.7667	117	O-VOCs	ethanal	air	14	669.142
AT0002R	47.7667	16.7667	117	O-VOCs	ethanal	air	15	571.442
AT0002R	47.7667	16.7667	117	O-VOCs	ethanal	air	16	637.593
AT0002R	47.7667	16.7667	117	O-VOCs	ethanal	air	17	563.3
AT0002R	47.7667	16.7667	117	O-VOCs	ethanal	air	18	537.858
AT0002R	47.7667	16.7667	117	O-VOCs	ethanal	air	19
AT0002R	47.7667	16.7667	117	O-VOCs	ethanedial	air	12	55.6152
AT0002R	47.7667	16.7667	117	O-VOCs	ethanedial	air	13	54.0703
AT0002R	47.7667	16.7667	117	O-VOCs	ethanedial	air	14	38.2354
AT0002R	47.7667	16.7667	117	O-VOCs	ethanedial	air	15	84.1952
AT0002R	47.7667	16.7667	117	O-VOCs	ethanedial	air	16	74.926
AT0002R	47.7667	16.7667	117	O-VOCs	ethanedial	air	17	67.2017
AT0002R	47.7667	16.7667	117	O-VOCs	ethanedial	air	18	57.9325
AT0002R	47.7667	16.7667	117	O-VOCs	ethanedial	air	19
AT0002R	47.7667	16.7667	117	O-VOCs	methanal	air	12	1546.11
AT0002R	47.7667	16.7667	117	O-VOCs	methanal	air	13	1763.36
AT0002R	47.7667	16.7667	117	O-VOCs	methanal	air	14	2586.06
AT0002R	47.7667	16.7667	117	O-VOCs	methanal	air	15	1828.31
AT0002R	47.7667	16.7667	117	O-VOCs	methanal	air	16	1850.7
AT0002R	47.7667	16.7667	117	O-VOCs	methanal	air	17	1894
AT0002R	47.7667	16.7667	117	O-VOCs	methanal	air	18	1921.63
AT0002R	47.7667	16.7667	117	O-VOCs	methanal	air	19
AT0002R	47.7667	16.7667	117	O-VOCs	propanal	air	12	86.8388
AT0002R	47.7667	16.7667	117	O-VOCs	propanal	air	13	101.119
AT0002R	47.7667	16.7667	117	O-VOCs	propanal	air	14	104.207
AT0002R	47.7667	16.7667	117	O-VOCs	propanal	air	15	99.1893
AT0002R	47.7667	16.7667	117	O-VOCs	propanal	air	16	110.768
AT0002R	47.7667	16.7667	117	O-VOCs	propanal	air	17	91.4702
AT0002R	47.7667	16.7667	117	O-VOCs	propanal	air	18	84.5231
AT0002R	47.7667	16.7667	117	O-VOCs	propanal	air	19
AT0002R	47.7667	16.7667	117	O-VOCs	propanone	air	12	1230.02
AT0002R	47.7667	16.7667	117	O-VOCs	propanone	air	13	2005.01
AT0002R	47.7667	16.7667	117	O-VOCs	propanone	air	14	2183.71
AT0002R	47.7667	16.7667	117	O-VOCs	propanone	air	15	1580.85
AT0002R	47.7667	16.7667	117	O-VOCs	propanone	air	16	2073.71
AT0002R	47.7667	16.7667	117	O-VOCs	propanone	air	17	1644.53
AT0002R	47.7667	16.7667	117	O-VOCs	propanone	air	18	1860.28
AT0002R	47.7667	16.7667	117	O-VOCs	propanone	air	19
AT0002R	47.7667	16.7667	117	PBAP	adonitol	pm25	12	0.07
AT0002R	47.7667	16.7667	117	PBAP	adonitol	pm25	13	0.13
AT0002R	47.7667	16.7667	117	PBAP	adonitol	pm25	14	0.1
AT0002R	47.7667	16.7667	117	PBAP	adonitol	pm25	15	0.005
AT0002R	47.7667	16.7667	117	PBAP	adonitol	pm25	16	0.12
AT0002R	47.7667	16.7667	117	PBAP	adonitol	pm25	17	0.005
AT0002R	47.7667	16.7667	117	PBAP	adonitol	pm25	18	0.06
AT0002R	47.7667	16.7667	117	PBAP	adonitol	pm25	19	0.005
AT0002R	47.7667	16.7667	117	PBAP	arabitol	pm25	12	1.7
AT0002R	47.7667	16.7667	117	PBAP	arabitol	pm25	13	3.01
AT0002R	47.7667	16.7667	117	PBAP	arabitol	pm25	14	2.45
AT0002R	47.7667	16.7667	117	PBAP	arabitol	pm25	15	0.77
AT0002R	47.7667	16.7667	117	PBAP	arabitol	pm25	16	4.28
AT0002R	47.7667	16.7667	117	PBAP	arabitol	pm25	17	1.34
AT0002R	47.7667	16.7667	117	PBAP	arabitol	pm25	18	3.48
AT0002R	47.7667	16.7667	117	PBAP	arabitol	pm25	19	0.94
AT0002R	47.7667	16.7667	117	PBAP	fructose	pm25	12	1.12
AT0002R	47.7667	16.7667	117	PBAP	fructose	pm25	13	1.25
AT0002R	47.7667	16.7667	117	PBAP	fructose	pm25	14	1.36
AT0002R	47.7667	16.7667	117	PBAP	fructose	pm25	15	0.27
AT0002R	47.7667	16.7667	117	PBAP	fructose	pm25	16	1.92
AT0002R	47.7667	16.7667	117	PBAP	fructose	pm25	17	0.63
AT0002R	47.7667	16.7667	117	PBAP	fructose	pm25	18	1.11
AT0002R	47.7667	16.7667	117	PBAP	fructose	pm25	19	0.62
AT0002R	47.7667	16.7667	117	PBAP	glucose	pm25	12	2.66
AT0002R	47.7667	16.7667	117	PBAP	glucose	pm25	13	3.86
AT0002R	47.7667	16.7667	117	PBAP	glucose	pm25	14	4.17
AT0002R	47.7667	16.7667	117	PBAP	glucose	pm25	15	3.03
AT0002R	47.7667	16.7667	117	PBAP	glucose	pm25	16	4.88
AT0002R	47.7667	16.7667	117	PBAP	glucose	pm25	17	3.38
AT0002R	47.7667	16.7667	117	PBAP	glucose	pm25	18	4.12
AT0002R	47.7667	16.7667	117	PBAP	glucose	pm25	19	2.75
AT0002R	47.7667	16.7667	117	PBAP	inositol	pm25	12	0.22
AT0002R	47.7667	16.7667	117	PBAP	inositol	pm25	13	0.4
AT0002R	47.7667	16.7667	117	PBAP	inositol	pm25	14	0.22
AT0002R	47.7667	16.7667	117	PBAP	inositol	pm25	15	0.22
AT0002R	47.7667	16.7667	117	PBAP	inositol	pm25	16	0.45
AT0002R	47.7667	16.7667	117	PBAP	inositol	pm25	17	0.22
AT0002R	47.7667	16.7667	117	PBAP	inositol	pm25	18	0.22
AT0002R	47.7667	16.7667	117	PBAP	inositol	pm25	19	0.22
AT0002R	47.7667	16.7667	117	PBAP	lactose	pm25	12	0.065
AT0002R	47.7667	16.7667	117	PBAP	lactose	pm25	13	0.065
AT0002R	47.7667	16.7667	117	PBAP	lactose	pm25	14	0.065
AT0002R	47.7667	16.7667	117	PBAP	lactose	pm25	15	0.065
AT0002R	47.7667	16.7667	117	PBAP	lactose	pm25	16	0.1
AT0002R	47.7667	16.7667	117	PBAP	lactose	pm25	17	0.065
AT0002R	47.7667	16.7667	117	PBAP	lactose	pm25	18	0.11
AT0002R	47.7667	16.7667	117	PBAP	lactose	pm25	19	0.065
AT0002R	47.7667	16.7667	117	PBAP	maltose	pm25	12	0.23
AT0002R	47.7667	16.7667	117	PBAP	maltose	pm25	13	0.23
AT0002R	47.7667	16.7667	117	PBAP	maltose	pm25	14	0.23
AT0002R	47.7667	16.7667	117	PBAP	maltose	pm25	15	0.23
AT0002R	47.7667	16.7667	117	PBAP	maltose	pm25	16	0.23
AT0002R	47.7667	16.7667	117	PBAP	maltose	pm25	17	0.23
AT0002R	47.7667	16.7667	117	PBAP	maltose	pm25	18	0.23
AT0002R	47.7667	16.7667	117	PBAP	maltose	pm25	19	0.23
AT0002R	47.7667	16.7667	117	PBAP	mannitol	pm25	12	0.29
AT0002R	47.7667	16.7667	117	PBAP	mannitol	pm25	13	0.29
AT0002R	47.7667	16.7667	117	PBAP	mannitol	pm25	14	0.29
AT0002R	47.7667	16.7667	117	PBAP	mannitol	pm25	15	0.29
AT0002R	47.7667	16.7667	117	PBAP	mannitol	pm25	16	0.29
AT0002R	47.7667	16.7667	117	PBAP	mannitol	pm25	17	0.29
AT0002R	47.7667	16.7667	117	PBAP	mannitol	pm25	18	0.29
AT0002R	47.7667	16.7667	117	PBAP	mannitol	pm25	19	0.29
AT0002R	47.7667	16.7667	117	PBAP	mannose	pm25	12	0.29
AT0002R	47.7667	16.7667	117	PBAP	mannose	pm25	13	0.29
AT0002R	47.7667	16.7667	117	PBAP	mannose	pm25	14	0.29
AT0002R	47.7667	16.7667	117	PBAP	mannose	pm25	15	5
AT0002R	47.7667	16.7667	117	PBAP	mannose	pm25	16	0.29
AT0002R	47.7667	16.7667	117	PBAP	mannose	pm25	17	0.29
AT0002R	47.7667	16.7667	117	PBAP	mannose	pm25	18	0.29
AT0002R	47.7667	16.7667	117	PBAP	mannose	pm25	19	8.48
AT0002R	47.7667	16.7667	117	PBAP	melezitose	pm25	12	0.035
AT0002R	47.7667	16.7667	117	PBAP	melezitose	pm25	13	0.035
AT0002R	47.7667	16.7667	117	PBAP	melezitose	pm25	14	0.035
AT0002R	47.7667	16.7667	117	PBAP	melezitose	pm25	15	0.035
AT0002R	47.7667	16.7667	117	PBAP	melezitose	pm25	16	0.035
AT0002R	47.7667	16.7667	117	PBAP	melezitose	pm25	17	0.035
AT0002R	47.7667	16.7667	117	PBAP	melezitose	pm25	18	0.03
AT0002R	47.7667	16.7667	117	PBAP	melezitose	pm25	19	0.035
AT0002R	47.7667	16.7667	117	PBAP	rhamnose	pm25	12	2.76
AT0002R	47.7667	16.7667	117	PBAP	rhamnose	pm25	13	4.07
AT0002R	47.7667	16.7667	117	PBAP	rhamnose	pm25	14	5.42
AT0002R	47.7667	16.7667	117	PBAP	rhamnose	pm25	15	2.35
AT0002R	47.7667	16.7667	117	PBAP	rhamnose	pm25	16	3.83
AT0002R	47.7667	16.7667	117	PBAP	rhamnose	pm25	17	2.43
AT0002R	47.7667	16.7667	117	PBAP	rhamnose	pm25	18	2.98
AT0002R	47.7667	16.7667	117	PBAP	rhamnose	pm25	19	1.02
AT0002R	47.7667	16.7667	117	PBAP	sorbitol	pm25	12	0.02
AT0002R	47.7667	16.7667	117	PBAP	sorbitol	pm25	13	0.1
AT0002R	47.7667	16.7667	117	PBAP	sorbitol	pm25	14	0.1
AT0002R	47.7667	16.7667	117	PBAP	sorbitol	pm25	15	0.1
AT0002R	47.7667	16.7667	117	PBAP	sorbitol	pm25	16	0.1
AT0002R	47.7667	16.7667	117	PBAP	sorbitol	pm25	17	0.1
AT0002R	47.7667	16.7667	117	PBAP	sorbitol	pm25	18	0.1
AT0002R	47.7667	16.7667	117	PBAP	sorbitol	pm25	19	0.1
AT0002R	47.7667	16.7667	117	PBAP	sucrose	pm25	12	0.63
AT0002R	47.7667	16.7667	117	PBAP	sucrose	pm25	13	1.5
AT0002R	47.7667	16.7667	117	PBAP	sucrose	pm25	14	0.63
AT0002R	47.7667	16.7667	117	PBAP	sucrose	pm25	15	0.63
AT0002R	47.7667	16.7667	117	PBAP	sucrose	pm25	16	0.37
AT0002R	47.7667	16.7667	117	PBAP	sucrose	pm25	17	0.63
AT0002R	47.7667	16.7667	117	PBAP	sucrose	pm25	18	0.63
AT0002R	47.7667	16.7667	117	PBAP	sucrose	pm25	19	0.63
AT0002R	47.7667	16.7667	117	PM	EC/TC	pm25	12	12.8571
AT0002R	47.7667	16.7667	117	PM	EC/TC	pm25	13	6.63265
AT0002R	47.7667	16.7667	117	PM	EC/TC	pm25	14	8.97436
AT0002R	47.7667	16.7667	117	PM	EC/TC	pm25	15	8.10811
AT0002R	47.7667	16.7667	117	PM	EC/TC	pm25	16	11.5789
AT0002R	47.7667	16.7667	117	PM	EC/TC	pm25	17	8.82353
AT0002R	47.7667	16.7667	117	PM	EC/TC	pm25	18	9.78261
AT0002R	47.7667	16.7667	117	PM	EC/TC	pm25	19	11.0619
AT0002R	47.7667	16.7667	117	PM	elemental_carbon	pm25	12	0.18
AT0002R	47.7667	16.7667	117	PM	elemental_carbon	pm25	13	0.13
AT0002R	47.7667	16.7667	117	PM	elemental_carbon	pm25	14	0.21
AT0002R	47.7667	16.7667	117	PM	elemental_carbon	pm25	15	0.15
AT0002R	47.7667	16.7667	117	PM	elemental_carbon	pm25	16	0.22
AT0002R	47.7667	16.7667	117	PM	elemental_carbon	pm25	17	0.12
AT0002R	47.7667	16.7667	117	PM	elemental_carbon	pm25	18	0.18
AT0002R	47.7667	16.7667	117	PM	elemental_carbon	pm25	19	0.25
AT0002R	47.7667	16.7667	117	PM	organic_carbon	pm25	12	1.22
AT0002R	47.7667	16.7667	117	PM	organic_carbon	pm25	13	1.83
AT0002R	47.7667	16.7667	117	PM	organic_carbon	pm25	14	2.13
AT0002R	47.7667	16.7667	117	PM	organic_carbon	pm25	15	1.7
AT0002R	47.7667	16.7667	117	PM	organic_carbon	pm25	16	1.68
AT0002R	47.7667	16.7667	117	PM	organic_carbon	pm25	17	1.24
AT0002R	47.7667	16.7667	117	PM	organic_carbon	pm25	18	1.66
AT0002R	47.7667	16.7667	117	PM	organic_carbon	pm25	19	2.01
AT0002R	47.7667	16.7667	117	PM	pm25_mass	pm25	12	7.1
AT0002R	47.7667	16.7667	117	PM	pm25_mass	pm25	13	8.1
AT0002R	47.7667	16.7667	117	PM	pm25_mass	pm25	14	8.9
AT0002R	47.7667	16.7667	117	PM	pm25_mass	pm25	15	8.8
AT0002R	47.7667	16.7667	117	PM	pm25_mass	pm25	16	8.8
AT0002R	47.7667	16.7667	117	PM	pm25_mass	pm25	17	7.3
AT0002R	47.7667	16.7667	117	PM	pm25_mass	pm25	18	8.9
AT0002R	47.7667	16.7667	117	PM	pm25_mass	pm25	19	10
AT0002R	47.7667	16.7667	117	Sesquiterpenes	alpha-humulene	air	12	0
AT0002R	47.7667	16.7667	117	Sesquiterpenes	alpha-humulene	air	14	0
AT0002R	47.7667	16.7667	117	Sesquiterpenes	alpha-humulene	air	15	0
AT0002R	47.7667	16.7667	117	Sesquiterpenes	alpha-humulene	air	16	0
AT0002R	47.7667	16.7667	117	Sesquiterpenes	alpha-humulene	air	17	0
AT0002R	47.7667	16.7667	117	Sesquiterpenes	alpha-humulene	air	18	0
AT0002R	47.7667	16.7667	117	Sesquiterpenes	beta-caryophyllene	air	12	0
AT0002R	47.7667	16.7667	117	Sesquiterpenes	beta-caryophyllene	air	14	0.515563
AT0002R	47.7667	16.7667	117	Sesquiterpenes	beta-caryophyllene	air	15	0.0987247
AT0002R	47.7667	16.7667	117	Sesquiterpenes	beta-caryophyllene	air	16	0.142602
AT0002R	47.7667	16.7667	117	Sesquiterpenes	beta-caryophyllene	air	17	0
AT0002R	47.7667	16.7667	117	Sesquiterpenes	beta-caryophyllene	air	18	0.471685
AT0002R	47.7667	16.7667	117	Sesquiterpenes	beta-farnesene	air	12	0.482654
AT0002R	47.7667	16.7667	117	Sesquiterpenes	beta-farnesene	air	14	2.22679
AT0002R	47.7667	16.7667	117	Sesquiterpenes	beta-farnesene	air	15	0
AT0002R	47.7667	16.7667	117	Sesquiterpenes	beta-farnesene	air	16	1.29439
AT0002R	47.7667	16.7667	117	Sesquiterpenes	beta-farnesene	air	17	1.77705
AT0002R	47.7667	16.7667	117	Sesquiterpenes	beta-farnesene	air	18	0.0329082
AT0002R	47.7667	16.7667	117	Sesquiterpenes	iso-longifolene	air	12	0
AT0002R	47.7667	16.7667	117	Sesquiterpenes	iso-longifolene	air	14	0
AT0002R	47.7667	16.7667	117	Sesquiterpenes	iso-longifolene	air	15	0
AT0002R	47.7667	16.7667	117	Sesquiterpenes	iso-longifolene	air	16	0
AT0002R	47.7667	16.7667	117	Sesquiterpenes	iso-longifolene	air	17	0.0987247
AT0002R	47.7667	16.7667	117	Sesquiterpenes	iso-longifolene	air	18	0
AT0002R	47.7667	16.7667	117	Sesquiterpenes	longicyclene	air	12	0
AT0002R	47.7667	16.7667	117	Sesquiterpenes	longicyclene	air	14	0
AT0002R	47.7667	16.7667	117	Sesquiterpenes	longicyclene	air	15	0
AT0002R	47.7667	16.7667	117	Sesquiterpenes	longicyclene	air	16	0
AT0002R	47.7667	16.7667	117	Sesquiterpenes	longicyclene	air	17	0
AT0002R	47.7667	16.7667	117	Sesquiterpenes	longicyclene	air	18	0
BE0007R	50.304	6.00127	496	Aromatics	1-2-3-trimethylbenzene	air	12	0.5852
BE0007R	50.304	6.00127	496	Aromatics	1-2-3-trimethylbenzene	air	13	5.2875
BE0007R	50.304	6.00127	496	Aromatics	1-2-3-trimethylbenzene	air	14	0.8422
BE0007R	50.304	6.00127	496	Aromatics	1-2-3-trimethylbenzene	air	15	0.7713
BE0007R	50.304	6.00127	496	Aromatics	1-2-3-trimethylbenzene	air	16	0.7207
BE0007R	50.304	6.00127	496	Aromatics	1-2-3-trimethylbenzene	air	17	2.339
BE0007R	50.304	6.00127	496	Aromatics	1-2-3-trimethylbenzene	air	18	2.1983
BE0007R	50.304	6.00127	496	Aromatics	1-2-3-trimethylbenzene	air	19	2.455
BE0007R	50.304	6.00127	496	Aromatics	1-2-4-trimethylbenzene	air	12	0.5644
BE0007R	50.304	6.00127	496	Aromatics	1-2-4-trimethylbenzene	air	13	15.1103
BE0007R	50.304	6.00127	496	Aromatics	1-2-4-trimethylbenzene	air	14	1.4171
BE0007R	50.304	6.00127	496	Aromatics	1-2-4-trimethylbenzene	air	15	1.7512
BE0007R	50.304	6.00127	496	Aromatics	1-2-4-trimethylbenzene	air	16	1.7089
BE0007R	50.304	6.00127	496	Aromatics	1-2-4-trimethylbenzene	air	17	9.2932
BE0007R	50.304	6.00127	496	Aromatics	1-2-4-trimethylbenzene	air	18	3.6849
BE0007R	50.304	6.00127	496	Aromatics	1-2-4-trimethylbenzene	air	19	2.1376
BE0007R	50.304	6.00127	496	Aromatics	1-3-5-trimethylbenzene	air	12	0
BE0007R	50.304	6.00127	496	Aromatics	1-3-5-trimethylbenzene	air	13	2.4661
BE0007R	50.304	6.00127	496	Aromatics	1-3-5-trimethylbenzene	air	14	0.041
BE0007R	50.304	6.00127	496	Aromatics	1-3-5-trimethylbenzene	air	15	0.0835
BE0007R	50.304	6.00127	496	Aromatics	1-3-5-trimethylbenzene	air	16	0.0206
BE0007R	50.304	6.00127	496	Aromatics	1-3-5-trimethylbenzene	air	17	1.4202
BE0007R	50.304	6.00127	496	Aromatics	1-3-5-trimethylbenzene	air	18	0.314
BE0007R	50.304	6.00127	496	Aromatics	1-3-5-trimethylbenzene	air	19	0.1481
BE0007R	50.304	6.00127	496	Aromatics	1-ethyl-3-methylbenzene	air	12	0.4807
BE0007R	50.304	6.00127	496	Aromatics	1-ethyl-3-methylbenzene	air	13	5.0578
BE0007R	50.304	6.00127	496	Aromatics	1-ethyl-3-methylbenzene	air	14	1.3555
BE0007R	50.304	6.00127	496	Aromatics	1-ethyl-3-methylbenzene	air	15	1.6053
BE0007R	50.304	6.00127	496	Aromatics	1-ethyl-3-methylbenzene	air	16	1.5442
BE0007R	50.304	6.00127	496	Aromatics	1-ethyl-3-methylbenzene	air	17	4.2813
BE0007R	50.304	6.00127	496	Aromatics	1-ethyl-3-methylbenzene	air	18	1.2144
BE0007R	50.304	6.00127	496	Aromatics	1-ethyl-3-methylbenzene	air	19	1.1005
BE0007R	50.304	6.00127	496	Aromatics	1-ethyl-4-methylbenzene	air	12	1.9437
BE0007R	50.304	6.00127	496	Aromatics	1-ethyl-4-methylbenzene	air	13	4.7652
BE0007R	50.304	6.00127	496	Aromatics	1-ethyl-4-methylbenzene	air	14	1.561
BE0007R	50.304	6.00127	496	Aromatics	1-ethyl-4-methylbenzene	air	15	1.2092
BE0007R	50.304	6.00127	496	Aromatics	1-ethyl-4-methylbenzene	air	16	1.4207
BE0007R	50.304	6.00127	496	Aromatics	1-ethyl-4-methylbenzene	air	17	4.2186
BE0007R	50.304	6.00127	496	Aromatics	1-ethyl-4-methylbenzene	air	18	1.0677
BE0007R	50.304	6.00127	496	Aromatics	1-ethyl-4-methylbenzene	air	19	0.9524
BE0007R	50.304	6.00127	496	Aromatics	benzene	air	12	235
BE0007R	50.304	6.00127	496	Aromatics	benzene	air	13	112
BE0007R	50.304	6.00127	496	Aromatics	benzene	air	14	133
BE0007R	50.304	6.00127	496	Aromatics	benzene	air	15	129
BE0007R	50.304	6.00127	496	Aromatics	benzene	air	16	63
BE0007R	50.304	6.00127	496	Aromatics	benzene	air	17	79
BE0007R	50.304	6.00127	496	Aromatics	benzene	air	18	167
BE0007R	50.304	6.00127	496	Aromatics	benzene	air	19	44
BE0007R	50.304	6.00127	496	Aromatics	ethylbenzene	air	12	4.8032
BE0007R	50.304	6.00127	496	Aromatics	ethylbenzene	air	13	29.505
BE0007R	50.304	6.00127	496	Aromatics	ethylbenzene	air	14	11.8125
BE0007R	50.304	6.00127	496	Aromatics	ethylbenzene	air	15	9.063
BE0007R	50.304	6.00127	496	Aromatics	ethylbenzene	air	16	8.1352
BE0007R	50.304	6.00127	496	Aromatics	ethylbenzene	air	17	13.784
BE0007R	50.304	6.00127	496	Aromatics	ethylbenzene	air	18	9.4337
BE0007R	50.304	6.00127	496	Aromatics	ethylbenzene	air	19	6.2539
BE0007R	50.304	6.00127	496	Aromatics	m-p-xylene	air	12	12.6112
BE0007R	50.304	6.00127	496	Aromatics	m-p-xylene	air	13	28.9609
BE0007R	50.304	6.00127	496	Aromatics	m-p-xylene	air	14	16.5792
BE0007R	50.304	6.00127	496	Aromatics	m-p-xylene	air	15	7.5762
BE0007R	50.304	6.00127	496	Aromatics	m-p-xylene	air	16	10.0699
BE0007R	50.304	6.00127	496	Aromatics	m-p-xylene	air	17	20.5221
BE0007R	50.304	6.00127	496	Aromatics	m-p-xylene	air	18	28.7516
BE0007R	50.304	6.00127	496	Aromatics	m-p-xylene	air	19	6.8528
BE0007R	50.304	6.00127	496	Aromatics	o-xylene	air	12	3.5491
BE0007R	50.304	6.00127	496	Aromatics	o-xylene	air	13	14.4331
BE0007R	50.304	6.00127	496	Aromatics	o-xylene	air	14	8.6269
BE0007R	50.304	6.00127	496	Aromatics	o-xylene	air	15	4.6731
BE0007R	50.304	6.00127	496	Aromatics	o-xylene	air	16	6.6434
BE0007R	50.304	6.00127	496	Aromatics	o-xylene	air	17	9.5518
BE0007R	50.304	6.00127	496	Aromatics	o-xylene	air	18	14.1744
BE0007R	50.304	6.00127	496	Aromatics	o-xylene	air	19	4.4568
BE0007R	50.304	6.00127	496	Aromatics	styrene	air	12	5.3807
BE0007R	50.304	6.00127	496	Aromatics	styrene	air	13	129.094
BE0007R	50.304	6.00127	496	Aromatics	styrene	air	14	2.02314
BE0007R	50.304	6.00127	496	Aromatics	styrene	air	15	25.2247
BE0007R	50.304	6.00127	496	Aromatics	styrene	air	16	2.86253
BE0007R	50.304	6.00127	496	Aromatics	styrene	air	17	102.771
BE0007R	50.304	6.00127	496	Aromatics	styrene	air	18	4.45522
BE0007R	50.304	6.00127	496	Aromatics	styrene	air	19	3.12081
BE0007R	50.304	6.00127	496	Aromatics	toluene	air	12	50.23
BE0007R	50.304	6.00127	496	Aromatics	toluene	air	13	75.9233
BE0007R	50.304	6.00127	496	Aromatics	toluene	air	14	74
BE0007R	50.304	6.00127	496	Aromatics	toluene	air	15	49.1725
BE0007R	50.304	6.00127	496	Aromatics	toluene	air	16	67.2825
BE0007R	50.304	6.00127	496	Aromatics	toluene	air	17	73.405
BE0007R	50.304	6.00127	496	Aromatics	toluene	air	18	82.4125
BE0007R	50.304	6.00127	496	Aromatics	toluene	air	19	80.9375
BE0007R	50.304	6.00127	496	Aromatics	trimethylbenzene	air	12	17.9775
BE0007R	50.304	6.00127	496	Aromatics	trimethylbenzene	air	13	15.6167
BE0007R	50.304	6.00127	496	Aromatics	trimethylbenzene	air	14
BE0007R	50.304	6.00127	496	Aromatics	trimethylbenzene	air	15	7.25
BE0007R	50.304	6.00127	496	Aromatics	trimethylbenzene	air	16	10.07
BE0007R	50.304	6.00127	496	Aromatics	trimethylbenzene	air	17	15.0975
BE0007R	50.304	6.00127	496	Aromatics	trimethylbenzene	air	18	37.4675
BE0007R	50.304	6.00127	496	Aromatics	trimethylbenzene	air	19	35.2925
BE0007R	50.304	6.00127	496	Aromatics	xylenes (+ethylbenzene)	air	12	27.0125
BE0007R	50.304	6.00127	496	Aromatics	xylenes (+ethylbenzene)	air	13	30.4433
BE0007R	50.304	6.00127	496	Aromatics	xylenes (+ethylbenzene)	air	14
BE0007R	50.304	6.00127	496	Aromatics	xylenes (+ethylbenzene)	air	15	15.715
BE0007R	50.304	6.00127	496	Aromatics	xylenes (+ethylbenzene)	air	16	24.38
BE0007R	50.304	6.00127	496	Aromatics	xylenes (+ethylbenzene)	air	17	20.83
BE0007R	50.304	6.00127	496	Aromatics	xylenes (+ethylbenzene)	air	18	53.875
BE0007R	50.304	6.00127	496	Aromatics	xylenes (+ethylbenzene)	air	19	28.04
BE0007R	50.304	6.00127	496	BB	levoglucosan	pm25	12	17.36
BE0007R	50.304	6.00127	496	BB	levoglucosan	pm25	13	14.79
BE0007R	50.304	6.00127	496	BB	levoglucosan	pm25	14	57.61
BE0007R	50.304	6.00127	496	BB	levoglucosan	pm25	15	6.74
BE0007R	50.304	6.00127	496	BB	levoglucosan	pm25	16	19.31
BE0007R	50.304	6.00127	496	BB	levoglucosan	pm25	17	18.48
BE0007R	50.304	6.00127	496	BB	levoglucosan	pm25	18	6.34
BE0007R	50.304	6.00127	496	BB	levoglucosan	pm25	19	7.98
BE0007R	50.304	6.00127	496	BSOA	3-MBTCA	pm25	12	7.76
BE0007R	50.304	6.00127	496	BSOA	3-MBTCA	pm25	13	7.54
BE0007R	50.304	6.00127	496	BSOA	3-MBTCA	pm25	14	4.75
BE0007R	50.304	6.00127	496	BSOA	3-MBTCA	pm25	15	3.03
BE0007R	50.304	6.00127	496	BSOA	3-MBTCA	pm25	16	4.25
BE0007R	50.304	6.00127	496	BSOA	3-MBTCA	pm25	17	3.87
BE0007R	50.304	6.00127	496	BSOA	3-MBTCA	pm25	18	7.4
BE0007R	50.304	6.00127	496	BSOA	3-MBTCA	pm25	19	11.03
BE0007R	50.304	6.00127	496	BSOA	sum_2-methyltetrols	pm25	12	0.19
BE0007R	50.304	6.00127	496	BSOA	sum_2-methyltetrols	pm25	13	2.74
BE0007R	50.304	6.00127	496	BSOA	sum_2-methyltetrols	pm25	14	1.22
BE0007R	50.304	6.00127	496	BSOA	sum_2-methyltetrols	pm25	15	0.44
BE0007R	50.304	6.00127	496	BSOA	sum_2-methyltetrols	pm25	16	0.58
BE0007R	50.304	6.00127	496	BSOA	sum_2-methyltetrols	pm25	17	1.43
BE0007R	50.304	6.00127	496	BSOA	sum_2-methyltetrols	pm25	18	6.09
BE0007R	50.304	6.00127	496	BSOA	sum_2-methyltetrols	pm25	19	9.51
BE0007R	50.304	6.00127	496	Inorganic	ammonium	pm25	12	0.483
BE0007R	50.304	6.00127	496	Inorganic	ammonium	pm25	13	0.219
BE0007R	50.304	6.00127	496	Inorganic	ammonium	pm25	14	0.254
BE0007R	50.304	6.00127	496	Inorganic	ammonium	pm25	15	0.188
BE0007R	50.304	6.00127	496	Inorganic	ammonium	pm25	16	0.226
BE0007R	50.304	6.00127	496	Inorganic	ammonium	pm25	17	0.199
BE0007R	50.304	6.00127	496	Inorganic	ammonium	pm25	18	0.168
BE0007R	50.304	6.00127	496	Inorganic	ammonium	pm25	19	0.165
BE0007R	50.304	6.00127	496	Inorganic	calcium	pm25	12	0.013
BE0007R	50.304	6.00127	496	Inorganic	calcium	pm25	13	0.037
BE0007R	50.304	6.00127	496	Inorganic	calcium	pm25	14	0.024
BE0007R	50.304	6.00127	496	Inorganic	calcium	pm25	15	0.027
BE0007R	50.304	6.00127	496	Inorganic	calcium	pm25	16	0.031
BE0007R	50.304	6.00127	496	Inorganic	calcium	pm25	17	0.018
BE0007R	50.304	6.00127	496	Inorganic	calcium	pm25	18	0.021
BE0007R	50.304	6.00127	496	Inorganic	calcium	pm25	19	0.046
BE0007R	50.304	6.00127	496	Inorganic	chloride	pm25	12	0.0034
BE0007R	50.304	6.00127	496	Inorganic	chloride	pm25	13	0.0034
BE0007R	50.304	6.00127	496	Inorganic	chloride	pm25	14	0.006
BE0007R	50.304	6.00127	496	Inorganic	chloride	pm25	15	0.004
BE0007R	50.304	6.00127	496	Inorganic	chloride	pm25	16	0.007
BE0007R	50.304	6.00127	496	Inorganic	chloride	pm25	17	0.005
BE0007R	50.304	6.00127	496	Inorganic	chloride	pm25	18	0.004
BE0007R	50.304	6.00127	496	Inorganic	chloride	pm25	19	0.005
BE0007R	50.304	6.00127	496	Inorganic	magnesium	pm25	12	0.002
BE0007R	50.304	6.00127	496	Inorganic	magnesium	pm25	13	0.003
BE0007R	50.304	6.00127	496	Inorganic	magnesium	pm25	14	0.014
BE0007R	50.304	6.00127	496	Inorganic	magnesium	pm25	15	0.013
BE0007R	50.304	6.00127	496	Inorganic	magnesium	pm25	16	0.009
BE0007R	50.304	6.00127	496	Inorganic	magnesium	pm25	17	0.012
BE0007R	50.304	6.00127	496	Inorganic	magnesium	pm25	18	0.008
BE0007R	50.304	6.00127	496	Inorganic	magnesium	pm25	19	0.008
BE0007R	50.304	6.00127	496	Inorganic	nitrate	pm25	12	0.005
BE0007R	50.304	6.00127	496	Inorganic	nitrate	pm25	13	0.008
BE0007R	50.304	6.00127	496	Inorganic	nitrate	pm25	14	0.014
BE0007R	50.304	6.00127	496	Inorganic	nitrate	pm25	15	0.007
BE0007R	50.304	6.00127	496	Inorganic	nitrate	pm25	16	0.012
BE0007R	50.304	6.00127	496	Inorganic	nitrate	pm25	17	0.013
BE0007R	50.304	6.00127	496	Inorganic	nitrate	pm25	18	0.011
BE0007R	50.304	6.00127	496	Inorganic	nitrate	pm25	19	0.012
BE0007R	50.304	6.00127	496	Inorganic	potassium	pm25	12	0.024
BE0007R	50.304	6.00127	496	Inorganic	potassium	pm25	13	0.036
BE0007R	50.304	6.00127	496	Inorganic	potassium	pm25	14	0.031
BE0007R	50.304	6.00127	496	Inorganic	potassium	pm25	15	0.013
BE0007R	50.304	6.00127	496	Inorganic	potassium	pm25	16	0.224
BE0007R	50.304	6.00127	496	Inorganic	potassium	pm25	17	0.028
BE0007R	50.304	6.00127	496	Inorganic	potassium	pm25	18	0.018
BE0007R	50.304	6.00127	496	Inorganic	potassium	pm25	19	0.029
BE0007R	50.304	6.00127	496	Inorganic	sodium	pm25	12	0.012
BE0007R	50.304	6.00127	496	Inorganic	sodium	pm25	13	0.02
BE0007R	50.304	6.00127	496	Inorganic	sodium	pm25	14	0.119
BE0007R	50.304	6.00127	496	Inorganic	sodium	pm25	15	0.121
BE0007R	50.304	6.00127	496	Inorganic	sodium	pm25	16	0.091
BE0007R	50.304	6.00127	496	Inorganic	sodium	pm25	17	0.097
BE0007R	50.304	6.00127	496	Inorganic	sodium	pm25	18	0.058
BE0007R	50.304	6.00127	496	Inorganic	sodium	pm25	19	0.029
BE0007R	50.304	6.00127	496	Inorganic	sulphate_total	pm25	12	0.508
BE0007R	50.304	6.00127	496	Inorganic	sulphate_total	pm25	13	0.235
BE0007R	50.304	6.00127	496	Inorganic	sulphate_total	pm25	14	0.317
BE0007R	50.304	6.00127	496	Inorganic	sulphate_total	pm25	15	0.277
BE0007R	50.304	6.00127	496	Inorganic	sulphate_total	pm25	16	0.375
BE0007R	50.304	6.00127	496	Inorganic	sulphate_total	pm25	17	0.262
BE0007R	50.304	6.00127	496	Inorganic	sulphate_total	pm25	18	0.175
BE0007R	50.304	6.00127	496	Inorganic	sulphate_total	pm25	19	0.164
BE0007R	50.304	6.00127	496	Isoprene	isoprene	air	12	310
BE0007R	50.304	6.00127	496	Isoprene	isoprene	air	13	353
BE0007R	50.304	6.00127	496	Isoprene	isoprene	air	14	353
BE0007R	50.304	6.00127	496	Isoprene	isoprene	air	15	233
BE0007R	50.304	6.00127	496	Isoprene	isoprene	air	16	305
BE0007R	50.304	6.00127	496	Isoprene	isoprene	air	17	319
BE0007R	50.304	6.00127	496	Isoprene	isoprene	air	18	147
BE0007R	50.304	6.00127	496	Isoprene	isoprene	air	19	1091
BE0007R	50.304	6.00127	496	methanol	methanol	air	12	3527.58
BE0007R	50.304	6.00127	496	methanol	methanol	air	13	7410.2
BE0007R	50.304	6.00127	496	methanol	methanol	air	14
BE0007R	50.304	6.00127	496	methanol	methanol	air	15	2705.08
BE0007R	50.304	6.00127	496	methanol	methanol	air	16	3516.55
BE0007R	50.304	6.00127	496	methanol	methanol	air	17	4680.12
BE0007R	50.304	6.00127	496	methanol	methanol	air	18	6203.32
BE0007R	50.304	6.00127	496	methanol	methanol	air	19	6636.72
BE0007R	50.304	6.00127	496	Monoterpenes	3-carene	air	12	127.023
BE0007R	50.304	6.00127	496	Monoterpenes	3-carene	air	13	151.435
BE0007R	50.304	6.00127	496	Monoterpenes	3-carene	air	14	58.8738
BE0007R	50.304	6.00127	496	Monoterpenes	3-carene	air	15	32.0027
BE0007R	50.304	6.00127	496	Monoterpenes	3-carene	air	16	68.1744
BE0007R	50.304	6.00127	496	Monoterpenes	3-carene	air	17	85.1218
BE0007R	50.304	6.00127	496	Monoterpenes	3-carene	air	18	184.38
BE0007R	50.304	6.00127	496	Monoterpenes	3-carene	air	19	120.829
BE0007R	50.304	6.00127	496	Monoterpenes	alpha-pinene	air	12	285.594
BE0007R	50.304	6.00127	496	Monoterpenes	alpha-pinene	air	13	529.442
BE0007R	50.304	6.00127	496	Monoterpenes	alpha-pinene	air	14	156.073
BE0007R	50.304	6.00127	496	Monoterpenes	alpha-pinene	air	15	82.0116
BE0007R	50.304	6.00127	496	Monoterpenes	alpha-pinene	air	16	139.274
BE0007R	50.304	6.00127	496	Monoterpenes	alpha-pinene	air	17	208.161
BE0007R	50.304	6.00127	496	Monoterpenes	alpha-pinene	air	18	562.487
BE0007R	50.304	6.00127	496	Monoterpenes	alpha-pinene	air	19	397.742
BE0007R	50.304	6.00127	496	Monoterpenes	beta-pinene	air	12	136.924
BE0007R	50.304	6.00127	496	Monoterpenes	beta-pinene	air	13	183.113
BE0007R	50.304	6.00127	496	Monoterpenes	beta-pinene	air	14	78.897
BE0007R	50.304	6.00127	496	Monoterpenes	beta-pinene	air	15	32.9959
BE0007R	50.304	6.00127	496	Monoterpenes	beta-pinene	air	16	74.7321
BE0007R	50.304	6.00127	496	Monoterpenes	beta-pinene	air	17	82.1553
BE0007R	50.304	6.00127	496	Monoterpenes	beta-pinene	air	18	227.806
BE0007R	50.304	6.00127	496	Monoterpenes	beta-pinene	air	19	131.772
BE0007R	50.304	6.00127	496	Monoterpenes	camphene	air	12	46.6124
BE0007R	50.304	6.00127	496	Monoterpenes	camphene	air	13	68.6464
BE0007R	50.304	6.00127	496	Monoterpenes	camphene	air	14	27.7969
BE0007R	50.304	6.00127	496	Monoterpenes	camphene	air	15	16.1301
BE0007R	50.304	6.00127	496	Monoterpenes	camphene	air	16	22.4342
BE0007R	50.304	6.00127	496	Monoterpenes	camphene	air	17	30.6954
BE0007R	50.304	6.00127	496	Monoterpenes	camphene	air	18	71.8717
BE0007R	50.304	6.00127	496	Monoterpenes	camphene	air	19	56.1855
BE0007R	50.304	6.00127	496	Monoterpenes	eucalyptol	air	12	13.2826
BE0007R	50.304	6.00127	496	Monoterpenes	eucalyptol	air	13	17.4679
BE0007R	50.304	6.00127	496	Monoterpenes	eucalyptol	air	14	10.6086
BE0007R	50.304	6.00127	496	Monoterpenes	eucalyptol	air	15	5.90013
BE0007R	50.304	6.00127	496	Monoterpenes	eucalyptol	air	16	6.68488
BE0007R	50.304	6.00127	496	Monoterpenes	eucalyptol	air	17	22.8594
BE0007R	50.304	6.00127	496	Monoterpenes	eucalyptol	air	18	19.4007
BE0007R	50.304	6.00127	496	Monoterpenes	eucalyptol	air	19	10.7394
BE0007R	50.304	6.00127	496	Monoterpenes	limonene	air	12	149.868
BE0007R	50.304	6.00127	496	Monoterpenes	limonene	air	13	165.854
BE0007R	50.304	6.00127	496	Monoterpenes	limonene	air	14	73.334
BE0007R	50.304	6.00127	496	Monoterpenes	limonene	air	15	27.9564
BE0007R	50.304	6.00127	496	Monoterpenes	limonene	air	16	68.3015
BE0007R	50.304	6.00127	496	Monoterpenes	limonene	air	17	49.4885
BE0007R	50.304	6.00127	496	Monoterpenes	limonene	air	18	137.426
BE0007R	50.304	6.00127	496	Monoterpenes	limonene	air	19	111.437
BE0007R	50.304	6.00127	496	Monoterpenes	myrcene	air	12	0
BE0007R	50.304	6.00127	496	Monoterpenes	myrcene	air	13	0
BE0007R	50.304	6.00127	496	Monoterpenes	myrcene	air	14	0
BE0007R	50.304	6.00127	496	Monoterpenes	myrcene	air	15	0
BE0007R	50.304	6.00127	496	Monoterpenes	myrcene	air	16	0
BE0007R	50.304	6.00127	496	Monoterpenes	myrcene	air	17	0
BE0007R	50.304	6.00127	496	Monoterpenes	myrcene	air	18	0
BE0007R	50.304	6.00127	496	Monoterpenes	myrcene	air	19	0
BE0007R	50.304	6.00127	496	Monoterpenes	p-cymene	air	12	6.0639
BE0007R	50.304	6.00127	496	Monoterpenes	p-cymene	air	13	27.3993
BE0007R	50.304	6.00127	496	Monoterpenes	p-cymene	air	14	7.7433
BE0007R	50.304	6.00127	496	Monoterpenes	p-cymene	air	15	3.5096
BE0007R	50.304	6.00127	496	Monoterpenes	p-cymene	air	16	3.7061
BE0007R	50.304	6.00127	496	Monoterpenes	p-cymene	air	17	5.8723
BE0007R	50.304	6.00127	496	Monoterpenes	p-cymene	air	18	17.7362
BE0007R	50.304	6.00127	496	Monoterpenes	p-cymene	air	19	18.6687
BE0007R	50.304	6.00127	496	Monoterpenes	sabinene	air	12	209.157
BE0007R	50.304	6.00127	496	Monoterpenes	sabinene	air	13	250.837
BE0007R	50.304	6.00127	496	Monoterpenes	sabinene	air	14	94.6508
BE0007R	50.304	6.00127	496	Monoterpenes	sabinene	air	15	53.8089
BE0007R	50.304	6.00127	496	Monoterpenes	sabinene	air	16	87.2892
BE0007R	50.304	6.00127	496	Monoterpenes	sabinene	air	17	121.982
BE0007R	50.304	6.00127	496	Monoterpenes	sabinene	air	18	301.235
BE0007R	50.304	6.00127	496	Monoterpenes	sabinene	air	19	343.121
BE0007R	50.304	6.00127	496	Monoterpenes	terpinolene	air	12	5.9556
BE0007R	50.304	6.00127	496	Monoterpenes	terpinolene	air	13	3.5587
BE0007R	50.304	6.00127	496	Monoterpenes	terpinolene	air	14	2.9536
BE0007R	50.304	6.00127	496	Monoterpenes	terpinolene	air	15	0.6805
BE0007R	50.304	6.00127	496	Monoterpenes	terpinolene	air	16	1.2898
BE0007R	50.304	6.00127	496	Monoterpenes	terpinolene	air	17	0.737
BE0007R	50.304	6.00127	496	Monoterpenes	terpinolene	air	18	3.0294
BE0007R	50.304	6.00127	496	Monoterpenes	terpinolene	air	19	3.7158
BE0007R	50.304	6.00127	496	NMHC (C2-C6)	2-2-dimethylbutane	air	12
BE0007R	50.304	6.00127	496	NMHC (C2-C6)	2-2-dimethylbutane	air	13
BE0007R	50.304	6.00127	496	NMHC (C2-C6)	2-2-dimethylbutane	air	14
BE0007R	50.304	6.00127	496	NMHC (C2-C6)	2-2-dimethylbutane	air	15
BE0007R	50.304	6.00127	496	NMHC (C2-C6)	2-2-dimethylbutane	air	16
BE0007R	50.304	6.00127	496	NMHC (C2-C6)	2-2-dimethylbutane	air	17
BE0007R	50.304	6.00127	496	NMHC (C2-C6)	2-2-dimethylbutane	air	18
BE0007R	50.304	6.00127	496	NMHC (C2-C6)	2-2-dimethylbutane	air	19
BE0007R	50.304	6.00127	496	NMHC (C2-C6)	2-3-dimethylbutane	air	12
BE0007R	50.304	6.00127	496	NMHC (C2-C6)	2-3-dimethylbutane	air	13
BE0007R	50.304	6.00127	496	NMHC (C2-C6)	2-3-dimethylbutane	air	14
BE0007R	50.304	6.00127	496	NMHC (C2-C6)	2-3-dimethylbutane	air	15
BE0007R	50.304	6.00127	496	NMHC (C2-C6)	2-3-dimethylbutane	air	16
BE0007R	50.304	6.00127	496	NMHC (C2-C6)	2-3-dimethylbutane	air	17
BE0007R	50.304	6.00127	496	NMHC (C2-C6)	2-3-dimethylbutane	air	18
BE0007R	50.304	6.00127	496	NMHC (C2-C6)	2-3-dimethylbutane	air	19
BE0007R	50.304	6.00127	496	NMHC (C2-C6)	2-methylbutane	air	12
BE0007R	50.304	6.00127	496	NMHC (C2-C6)	2-methylbutane	air	13
BE0007R	50.304	6.00127	496	NMHC (C2-C6)	2-methylbutane	air	14
BE0007R	50.304	6.00127	496	NMHC (C2-C6)	2-methylbutane	air	15
BE0007R	50.304	6.00127	496	NMHC (C2-C6)	2-methylbutane	air	16
BE0007R	50.304	6.00127	496	NMHC (C2-C6)	2-methylbutane	air	17	92
BE0007R	50.304	6.00127	496	NMHC (C2-C6)	2-methylbutane	air	18	127
BE0007R	50.304	6.00127	496	NMHC (C2-C6)	2-methylbutane	air	19	98
BE0007R	50.304	6.00127	496	NMHC (C2-C6)	2-methylpentane	air	12
BE0007R	50.304	6.00127	496	NMHC (C2-C6)	2-methylpentane	air	13
BE0007R	50.304	6.00127	496	NMHC (C2-C6)	2-methylpentane	air	14
BE0007R	50.304	6.00127	496	NMHC (C2-C6)	2-methylpentane	air	15
BE0007R	50.304	6.00127	496	NMHC (C2-C6)	2-methylpentane	air	16
BE0007R	50.304	6.00127	496	NMHC (C2-C6)	2-methylpentane	air	17
BE0007R	50.304	6.00127	496	NMHC (C2-C6)	2-methylpentane	air	18
BE0007R	50.304	6.00127	496	NMHC (C2-C6)	2-methylpentane	air	19
BE0007R	50.304	6.00127	496	NMHC (C2-C6)	2-methylpropane	air	12	25
BE0007R	50.304	6.00127	496	NMHC (C2-C6)	2-methylpropane	air	13	31
BE0007R	50.304	6.00127	496	NMHC (C2-C6)	2-methylpropane	air	14	293
BE0007R	50.304	6.00127	496	NMHC (C2-C6)	2-methylpropane	air	15	94
BE0007R	50.304	6.00127	496	NMHC (C2-C6)	2-methylpropane	air	16	46
BE0007R	50.304	6.00127	496	NMHC (C2-C6)	2-methylpropane	air	17	99
BE0007R	50.304	6.00127	496	NMHC (C2-C6)	2-methylpropane	air	18
BE0007R	50.304	6.00127	496	NMHC (C2-C6)	2-methylpropane	air	19	42
BE0007R	50.304	6.00127	496	NMHC (C2-C6)	3-methylpentane	air	12	51
BE0007R	50.304	6.00127	496	NMHC (C2-C6)	3-methylpentane	air	13	51
BE0007R	50.304	6.00127	496	NMHC (C2-C6)	3-methylpentane	air	14
BE0007R	50.304	6.00127	496	NMHC (C2-C6)	3-methylpentane	air	15
BE0007R	50.304	6.00127	496	NMHC (C2-C6)	3-methylpentane	air	16	97
BE0007R	50.304	6.00127	496	NMHC (C2-C6)	3-methylpentane	air	17	105
BE0007R	50.304	6.00127	496	NMHC (C2-C6)	3-methylpentane	air	18
BE0007R	50.304	6.00127	496	NMHC (C2-C6)	3-methylpentane	air	19	88
BE0007R	50.304	6.00127	496	NMHC (C2-C6)	ethane	air	12	1425
BE0007R	50.304	6.00127	496	NMHC (C2-C6)	ethane	air	13	913
BE0007R	50.304	6.00127	496	NMHC (C2-C6)	ethane	air	14	1500
BE0007R	50.304	6.00127	496	NMHC (C2-C6)	ethane	air	15	1361
BE0007R	50.304	6.00127	496	NMHC (C2-C6)	ethane	air	16	1264
BE0007R	50.304	6.00127	496	NMHC (C2-C6)	ethane	air	17	2340
BE0007R	50.304	6.00127	496	NMHC (C2-C6)	ethane	air	18	1065
BE0007R	50.304	6.00127	496	NMHC (C2-C6)	ethane	air	19	978
BE0007R	50.304	6.00127	496	NMHC (C2-C6)	ethene	air	12	417
BE0007R	50.304	6.00127	496	NMHC (C2-C6)	ethene	air	13	379
BE0007R	50.304	6.00127	496	NMHC (C2-C6)	ethene	air	14	860
BE0007R	50.304	6.00127	496	NMHC (C2-C6)	ethene	air	15	728
BE0007R	50.304	6.00127	496	NMHC (C2-C6)	ethene	air	16	465
BE0007R	50.304	6.00127	496	NMHC (C2-C6)	ethene	air	17	1222
BE0007R	50.304	6.00127	496	NMHC (C2-C6)	ethene	air	18	2013
BE0007R	50.304	6.00127	496	NMHC (C2-C6)	ethene	air	19	993
BE0007R	50.304	6.00127	496	NMHC (C2-C6)	ethyne	air	12	78
BE0007R	50.304	6.00127	496	NMHC (C2-C6)	ethyne	air	13	129
BE0007R	50.304	6.00127	496	NMHC (C2-C6)	ethyne	air	14	174
BE0007R	50.304	6.00127	496	NMHC (C2-C6)	ethyne	air	15	120
BE0007R	50.304	6.00127	496	NMHC (C2-C6)	ethyne	air	16
BE0007R	50.304	6.00127	496	NMHC (C2-C6)	ethyne	air	17
BE0007R	50.304	6.00127	496	NMHC (C2-C6)	ethyne	air	18
BE0007R	50.304	6.00127	496	NMHC (C2-C6)	ethyne	air	19
BE0007R	50.304	6.00127	496	NMHC (C2-C6)	n-butane	air	12	85
BE0007R	50.304	6.00127	496	NMHC (C2-C6)	n-butane	air	13	85
BE0007R	50.304	6.00127	496	NMHC (C2-C6)	n-butane	air	14	149
BE0007R	50.304	6.00127	496	NMHC (C2-C6)	n-butane	air	15	110
BE0007R	50.304	6.00127	496	NMHC (C2-C6)	n-butane	air	16	88
BE0007R	50.304	6.00127	496	NMHC (C2-C6)	n-butane	air	17	236
BE0007R	50.304	6.00127	496	NMHC (C2-C6)	n-butane	air	18	31
BE0007R	50.304	6.00127	496	NMHC (C2-C6)	n-butane	air	19	61
BE0007R	50.304	6.00127	496	NMHC (C2-C6)	n-hexane	air	12	16
BE0007R	50.304	6.00127	496	NMHC (C2-C6)	n-hexane	air	13
BE0007R	50.304	6.00127	496	NMHC (C2-C6)	n-hexane	air	14
BE0007R	50.304	6.00127	496	NMHC (C2-C6)	n-hexane	air	15
BE0007R	50.304	6.00127	496	NMHC (C2-C6)	n-hexane	air	16
BE0007R	50.304	6.00127	496	NMHC (C2-C6)	n-hexane	air	17	69
BE0007R	50.304	6.00127	496	NMHC (C2-C6)	n-hexane	air	18
BE0007R	50.304	6.00127	496	NMHC (C2-C6)	n-hexane	air	19	47
BE0007R	50.304	6.00127	496	NMHC (C2-C6)	n-pentane	air	12	61
BE0007R	50.304	6.00127	496	NMHC (C2-C6)	n-pentane	air	13	55
BE0007R	50.304	6.00127	496	NMHC (C2-C6)	n-pentane	air	14	114
BE0007R	50.304	6.00127	496	NMHC (C2-C6)	n-pentane	air	15	58
BE0007R	50.304	6.00127	496	NMHC (C2-C6)	n-pentane	air	16	71
BE0007R	50.304	6.00127	496	NMHC (C2-C6)	n-pentane	air	17
BE0007R	50.304	6.00127	496	NMHC (C2-C6)	n-pentane	air	18
BE0007R	50.304	6.00127	496	NMHC (C2-C6)	n-pentane	air	19	84
BE0007R	50.304	6.00127	496	NMHC (C2-C6)	propane	air	12	339
BE0007R	50.304	6.00127	496	NMHC (C2-C6)	propane	air	13	216
BE0007R	50.304	6.00127	496	NMHC (C2-C6)	propane	air	14	363
BE0007R	50.304	6.00127	496	NMHC (C2-C6)	propane	air	15	368
BE0007R	50.304	6.00127	496	NMHC (C2-C6)	propane	air	16	372
BE0007R	50.304	6.00127	496	NMHC (C2-C6)	propane	air	17	685
BE0007R	50.304	6.00127	496	NMHC (C2-C6)	propane	air	18	222
BE0007R	50.304	6.00127	496	NMHC (C2-C6)	propane	air	19	119
BE0007R	50.304	6.00127	496	NMHC (C2-C6)	propene	air	12	120
BE0007R	50.304	6.00127	496	NMHC (C2-C6)	propene	air	13	95
BE0007R	50.304	6.00127	496	NMHC (C2-C6)	propene	air	14	240
BE0007R	50.304	6.00127	496	NMHC (C2-C6)	propene	air	15	201
BE0007R	50.304	6.00127	496	NMHC (C2-C6)	propene	air	16	48
BE0007R	50.304	6.00127	496	NMHC (C2-C6)	propene	air	17	236
BE0007R	50.304	6.00127	496	NMHC (C2-C6)	propene	air	18	166
BE0007R	50.304	6.00127	496	NMHC (C2-C6)	propene	air	19	167
BE0007R	50.304	6.00127	496	NMHC (C2-C6)	propyne	air	12	85
BE0007R	50.304	6.00127	496	NMHC (C2-C6)	propyne	air	13	70
BE0007R	50.304	6.00127	496	NMHC (C2-C6)	propyne	air	14	315
BE0007R	50.304	6.00127	496	NMHC (C2-C6)	propyne	air	15	285
BE0007R	50.304	6.00127	496	NMHC (C2-C6)	propyne	air	16
BE0007R	50.304	6.00127	496	NMHC (C2-C6)	propyne	air	17	323
BE0007R	50.304	6.00127	496	NMHC (C2-C6)	propyne	air	18
BE0007R	50.304	6.00127	496	NMHC (C2-C6)	propyne	air	19	280
BE0007R	50.304	6.00127	496	NMHC (C7-C12)	n-decane	air	12	5.6495
BE0007R	50.304	6.00127	496	NMHC (C7-C12)	n-decane	air	13	9.7101
BE0007R	50.304	6.00127	496	NMHC (C7-C12)	n-decane	air	14	3.47
BE0007R	50.304	6.00127	496	NMHC (C7-C12)	n-decane	air	15	2.4654
BE0007R	50.304	6.00127	496	NMHC (C7-C12)	n-decane	air	16	3.4786
BE0007R	50.304	6.00127	496	NMHC (C7-C12)	n-decane	air	17	6.1745
BE0007R	50.304	6.00127	496	NMHC (C7-C12)	n-decane	air	18	5.8364
BE0007R	50.304	6.00127	496	NMHC (C7-C12)	n-decane	air	19	4.8272
BE0007R	50.304	6.00127	496	NMHC (C7-C12)	n-dodecane	air	12	13.2724
BE0007R	50.304	6.00127	496	NMHC (C7-C12)	n-dodecane	air	13	15.337
BE0007R	50.304	6.00127	496	NMHC (C7-C12)	n-dodecane	air	14	5.6523
BE0007R	50.304	6.00127	496	NMHC (C7-C12)	n-dodecane	air	15	5.1485
BE0007R	50.304	6.00127	496	NMHC (C7-C12)	n-dodecane	air	16	5.6661
BE0007R	50.304	6.00127	496	NMHC (C7-C12)	n-dodecane	air	17	9.2837
BE0007R	50.304	6.00127	496	NMHC (C7-C12)	n-dodecane	air	18	9.8981
BE0007R	50.304	6.00127	496	NMHC (C7-C12)	n-dodecane	air	19	10.1553
BE0007R	50.304	6.00127	496	NMHC (C7-C12)	n-nonane	air	12	30.5534
BE0007R	50.304	6.00127	496	NMHC (C7-C12)	n-nonane	air	13	41.913
BE0007R	50.304	6.00127	496	NMHC (C7-C12)	n-nonane	air	14	27.7169
BE0007R	50.304	6.00127	496	NMHC (C7-C12)	n-nonane	air	15	20.1227
BE0007R	50.304	6.00127	496	NMHC (C7-C12)	n-nonane	air	16	27.0135
BE0007R	50.304	6.00127	496	NMHC (C7-C12)	n-nonane	air	17	45.7957
BE0007R	50.304	6.00127	496	NMHC (C7-C12)	n-nonane	air	18	34.9243
BE0007R	50.304	6.00127	496	NMHC (C7-C12)	n-nonane	air	19	40.4615
BE0007R	50.304	6.00127	496	NMHC (C7-C12)	n-octane	air	12	91.5245
BE0007R	50.304	6.00127	496	NMHC (C7-C12)	n-octane	air	13	217.134
BE0007R	50.304	6.00127	496	NMHC (C7-C12)	n-octane	air	14	115.664
BE0007R	50.304	6.00127	496	NMHC (C7-C12)	n-octane	air	15	57.3834
BE0007R	50.304	6.00127	496	NMHC (C7-C12)	n-octane	air	16	63.4128
BE0007R	50.304	6.00127	496	NMHC (C7-C12)	n-octane	air	17	125.296
BE0007R	50.304	6.00127	496	NMHC (C7-C12)	n-octane	air	18	143.016
BE0007R	50.304	6.00127	496	NMHC (C7-C12)	n-octane	air	19	90.7485
BE0007R	50.304	6.00127	496	NMHC (C7-C12)	n-undecane	air	12	8.1959
BE0007R	50.304	6.00127	496	NMHC (C7-C12)	n-undecane	air	13	11.8922
BE0007R	50.304	6.00127	496	NMHC (C7-C12)	n-undecane	air	14	2.6849
BE0007R	50.304	6.00127	496	NMHC (C7-C12)	n-undecane	air	15	3.0458
BE0007R	50.304	6.00127	496	NMHC (C7-C12)	n-undecane	air	16	4.2748
BE0007R	50.304	6.00127	496	NMHC (C7-C12)	n-undecane	air	17	6.9051
BE0007R	50.304	6.00127	496	NMHC (C7-C12)	n-undecane	air	18	8.5325
BE0007R	50.304	6.00127	496	NMHC (C7-C12)	n-undecane	air	19	7.649
BE0007R	50.304	6.00127	496	NO2	nitrogen_dioxide	air	12	1.5167
BE0007R	50.304	6.00127	496	NO2	nitrogen_dioxide	air	13	1.6619
BE0007R	50.304	6.00127	496	NO2	nitrogen_dioxide	air	14	2.281
BE0007R	50.304	6.00127	496	NO2	nitrogen_dioxide	air	15	1.1375
BE0007R	50.304	6.00127	496	NO2	nitrogen_dioxide	air	16	3.3696
BE0007R	50.304	6.00127	496	NO2	nitrogen_dioxide	air	17	1.6875
BE0007R	50.304	6.00127	496	NO2	nitrogen_dioxide	air	18	1.3957
BE0007R	50.304	6.00127	496	NO2	nitrogen_dioxide	air	19	1.125
BE0007R	50.304	6.00127	496	O3max	ozone	air	12	81
BE0007R	50.304	6.00127	496	O3max	ozone	air	13	135
BE0007R	50.304	6.00127	496	O3max	ozone	air	14	115
BE0007R	50.304	6.00127	496	O3max	ozone	air	15	89
BE0007R	50.304	6.00127	496	O3max	ozone	air	16	91
BE0007R	50.304	6.00127	496	O3max	ozone	air	17	119
BE0007R	50.304	6.00127	496	O3max	ozone	air	18	125
BE0007R	50.304	6.00127	496	O3max	ozone	air	19	144
BE0007R	50.304	6.00127	496	Organic_acid	2-ketobutyric_acid	pm25	12	0.22
BE0007R	50.304	6.00127	496	Organic_acid	2-ketobutyric_acid	pm25	13	0.22
BE0007R	50.304	6.00127	496	Organic_acid	2-ketobutyric_acid	pm25	14	0.22
BE0007R	50.304	6.00127	496	Organic_acid	2-ketobutyric_acid	pm25	15	0.22
BE0007R	50.304	6.00127	496	Organic_acid	2-ketobutyric_acid	pm25	16	0.22
BE0007R	50.304	6.00127	496	Organic_acid	2-ketobutyric_acid	pm25	17	0.22
BE0007R	50.304	6.00127	496	Organic_acid	2-ketobutyric_acid	pm25	18	0.22
BE0007R	50.304	6.00127	496	Organic_acid	2-ketobutyric_acid	pm25	19	0.22
BE0007R	50.304	6.00127	496	Organic_acid	3-hydroxybutyric_acid	pm25	12	5.51
BE0007R	50.304	6.00127	496	Organic_acid	3-hydroxybutyric_acid	pm25	13	1.47
BE0007R	50.304	6.00127	496	Organic_acid	3-hydroxybutyric_acid	pm25	14	1.47
BE0007R	50.304	6.00127	496	Organic_acid	3-hydroxybutyric_acid	pm25	15	1.47
BE0007R	50.304	6.00127	496	Organic_acid	3-hydroxybutyric_acid	pm25	16	1.47
BE0007R	50.304	6.00127	496	Organic_acid	3-hydroxybutyric_acid	pm25	17	1.47
BE0007R	50.304	6.00127	496	Organic_acid	3-hydroxybutyric_acid	pm25	18	1.47
BE0007R	50.304	6.00127	496	Organic_acid	3-hydroxybutyric_acid	pm25	19	1.47
BE0007R	50.304	6.00127	496	Organic_acid	4-hydroxybenzoic_acid	pm25	12	0.007
BE0007R	50.304	6.00127	496	Organic_acid	4-hydroxybenzoic_acid	pm25	13	0.007
BE0007R	50.304	6.00127	496	Organic_acid	4-hydroxybenzoic_acid	pm25	14	0.007
BE0007R	50.304	6.00127	496	Organic_acid	4-hydroxybenzoic_acid	pm25	15	0.007
BE0007R	50.304	6.00127	496	Organic_acid	4-hydroxybenzoic_acid	pm25	16	0.007
BE0007R	50.304	6.00127	496	Organic_acid	4-hydroxybenzoic_acid	pm25	17	0.007
BE0007R	50.304	6.00127	496	Organic_acid	4-hydroxybenzoic_acid	pm25	18	0.007
BE0007R	50.304	6.00127	496	Organic_acid	4-hydroxybenzoic_acid	pm25	19	0.007
BE0007R	50.304	6.00127	496	Organic_acid	4-methylphthalic_acid	pm25	12	0.01
BE0007R	50.304	6.00127	496	Organic_acid	4-methylphthalic_acid	pm25	13	0.3
BE0007R	50.304	6.00127	496	Organic_acid	4-methylphthalic_acid	pm25	14	0.29
BE0007R	50.304	6.00127	496	Organic_acid	4-methylphthalic_acid	pm25	15	0.13
BE0007R	50.304	6.00127	496	Organic_acid	4-methylphthalic_acid	pm25	16	0.23
BE0007R	50.304	6.00127	496	Organic_acid	4-methylphthalic_acid	pm25	17	0.16
BE0007R	50.304	6.00127	496	Organic_acid	4-methylphthalic_acid	pm25	18	0.17
BE0007R	50.304	6.00127	496	Organic_acid	4-methylphthalic_acid	pm25	19	0.17
BE0007R	50.304	6.00127	496	Organic_acid	4-oxoheptanoic_acid	pm25	12	4.88
BE0007R	50.304	6.00127	496	Organic_acid	4-oxoheptanoic_acid	pm25	13	9.59
BE0007R	50.304	6.00127	496	Organic_acid	4-oxoheptanoic_acid	pm25	14	7.63
BE0007R	50.304	6.00127	496	Organic_acid	4-oxoheptanoic_acid	pm25	15	3.16
BE0007R	50.304	6.00127	496	Organic_acid	4-oxoheptanoic_acid	pm25	16	5.45
BE0007R	50.304	6.00127	496	Organic_acid	4-oxoheptanoic_acid	pm25	17	4.76
BE0007R	50.304	6.00127	496	Organic_acid	4-oxoheptanoic_acid	pm25	18	8.27
BE0007R	50.304	6.00127	496	Organic_acid	4-oxoheptanoic_acid	pm25	19	10.51
BE0007R	50.304	6.00127	496	Organic_acid	adipic_acid	pm25	12	0.525
BE0007R	50.304	6.00127	496	Organic_acid	adipic_acid	pm25	13	0.525
BE0007R	50.304	6.00127	496	Organic_acid	adipic_acid	pm25	14	0.525
BE0007R	50.304	6.00127	496	Organic_acid	adipic_acid	pm25	15	0.525
BE0007R	50.304	6.00127	496	Organic_acid	adipic_acid	pm25	16	0.525
BE0007R	50.304	6.00127	496	Organic_acid	adipic_acid	pm25	17	0.525
BE0007R	50.304	6.00127	496	Organic_acid	adipic_acid	pm25	18	0.525
BE0007R	50.304	6.00127	496	Organic_acid	adipic_acid	pm25	19	0.525
BE0007R	50.304	6.00127	496	Organic_acid	azelaic_acid	pm25	12	1.14
BE0007R	50.304	6.00127	496	Organic_acid	azelaic_acid	pm25	13	1.73
BE0007R	50.304	6.00127	496	Organic_acid	azelaic_acid	pm25	14	1.3
BE0007R	50.304	6.00127	496	Organic_acid	azelaic_acid	pm25	15	1.1
BE0007R	50.304	6.00127	496	Organic_acid	azelaic_acid	pm25	16	0.96
BE0007R	50.304	6.00127	496	Organic_acid	azelaic_acid	pm25	17	1.44
BE0007R	50.304	6.00127	496	Organic_acid	azelaic_acid	pm25	18	2.02
BE0007R	50.304	6.00127	496	Organic_acid	azelaic_acid	pm25	19	1.94
BE0007R	50.304	6.00127	496	Organic_acid	benzoic_acid	pm25	12	0.265
BE0007R	50.304	6.00127	496	Organic_acid	benzoic_acid	pm25	13	0.265
BE0007R	50.304	6.00127	496	Organic_acid	benzoic_acid	pm25	14	0.265
BE0007R	50.304	6.00127	496	Organic_acid	benzoic_acid	pm25	15	0.265
BE0007R	50.304	6.00127	496	Organic_acid	benzoic_acid	pm25	16	0.265
BE0007R	50.304	6.00127	496	Organic_acid	benzoic_acid	pm25	17	0.265
BE0007R	50.304	6.00127	496	Organic_acid	benzoic_acid	pm25	18	0.265
BE0007R	50.304	6.00127	496	Organic_acid	benzoic_acid	pm25	19	0.265
BE0007R	50.304	6.00127	496	Organic_acid	caproic_acid	pm25	12	1.355
BE0007R	50.304	6.00127	496	Organic_acid	caproic_acid	pm25	13	1.355
BE0007R	50.304	6.00127	496	Organic_acid	caproic_acid	pm25	14	1.355
BE0007R	50.304	6.00127	496	Organic_acid	caproic_acid	pm25	15	1.355
BE0007R	50.304	6.00127	496	Organic_acid	caproic_acid	pm25	16	1.355
BE0007R	50.304	6.00127	496	Organic_acid	caproic_acid	pm25	17	1.355
BE0007R	50.304	6.00127	496	Organic_acid	caproic_acid	pm25	18	1.355
BE0007R	50.304	6.00127	496	Organic_acid	caproic_acid	pm25	19	1.355
BE0007R	50.304	6.00127	496	Organic_acid	cis-pinonic_acid	pm25	12	3.55
BE0007R	50.304	6.00127	496	Organic_acid	cis-pinonic_acid	pm25	13	2.76
BE0007R	50.304	6.00127	496	Organic_acid	cis-pinonic_acid	pm25	14	2.16
BE0007R	50.304	6.00127	496	Organic_acid	cis-pinonic_acid	pm25	15	5.26
BE0007R	50.304	6.00127	496	Organic_acid	cis-pinonic_acid	pm25	16	3.17
BE0007R	50.304	6.00127	496	Organic_acid	cis-pinonic_acid	pm25	17	5.26
BE0007R	50.304	6.00127	496	Organic_acid	cis-pinonic_acid	pm25	18	4.6
BE0007R	50.304	6.00127	496	Organic_acid	cis-pinonic_acid	pm25	19	3.38
BE0007R	50.304	6.00127	496	Organic_acid	citraconic_acid	pm25	12	0.18
BE0007R	50.304	6.00127	496	Organic_acid	citraconic_acid	pm25	13	0.13
BE0007R	50.304	6.00127	496	Organic_acid	citraconic_acid	pm25	14	0.19
BE0007R	50.304	6.00127	496	Organic_acid	citraconic_acid	pm25	15	0.18
BE0007R	50.304	6.00127	496	Organic_acid	citraconic_acid	pm25	16	0.12
BE0007R	50.304	6.00127	496	Organic_acid	citraconic_acid	pm25	17	0.11
BE0007R	50.304	6.00127	496	Organic_acid	citraconic_acid	pm25	18	0.18
BE0007R	50.304	6.00127	496	Organic_acid	citraconic_acid	pm25	19	0.22
BE0007R	50.304	6.00127	496	Organic_acid	citric_acid	pm25	12	0.2
BE0007R	50.304	6.00127	496	Organic_acid	citric_acid	pm25	13	1.27
BE0007R	50.304	6.00127	496	Organic_acid	citric_acid	pm25	14	0.92
BE0007R	50.304	6.00127	496	Organic_acid	citric_acid	pm25	15	0.14
BE0007R	50.304	6.00127	496	Organic_acid	citric_acid	pm25	16	0.65
BE0007R	50.304	6.00127	496	Organic_acid	citric_acid	pm25	17	0.84
BE0007R	50.304	6.00127	496	Organic_acid	citric_acid	pm25	18	0.89
BE0007R	50.304	6.00127	496	Organic_acid	citric_acid	pm25	19	1.86
BE0007R	50.304	6.00127	496	Organic_acid	gluconic_acid	pm25	12	0.31
BE0007R	50.304	6.00127	496	Organic_acid	gluconic_acid	pm25	13	0.53
BE0007R	50.304	6.00127	496	Organic_acid	gluconic_acid	pm25	14	0.75
BE0007R	50.304	6.00127	496	Organic_acid	gluconic_acid	pm25	15	0.18
BE0007R	50.304	6.00127	496	Organic_acid	gluconic_acid	pm25	16	0.41
BE0007R	50.304	6.00127	496	Organic_acid	gluconic_acid	pm25	17	0.26
BE0007R	50.304	6.00127	496	Organic_acid	gluconic_acid	pm25	18	0.24
BE0007R	50.304	6.00127	496	Organic_acid	gluconic_acid	pm25	19	0.45
BE0007R	50.304	6.00127	496	Organic_acid	glutaric_acid	pm25	12	0.36
BE0007R	50.304	6.00127	496	Organic_acid	glutaric_acid	pm25	13	0.36
BE0007R	50.304	6.00127	496	Organic_acid	glutaric_acid	pm25	14	0.36
BE0007R	50.304	6.00127	496	Organic_acid	glutaric_acid	pm25	15	0.36
BE0007R	50.304	6.00127	496	Organic_acid	glutaric_acid	pm25	16	0.36
BE0007R	50.304	6.00127	496	Organic_acid	glutaric_acid	pm25	17	0.36
BE0007R	50.304	6.00127	496	Organic_acid	glutaric_acid	pm25	18	0.36
BE0007R	50.304	6.00127	496	Organic_acid	glutaric_acid	pm25	19	0.36
BE0007R	50.304	6.00127	496	Organic_acid	glycolic_acid	pm25	12	0.195
BE0007R	50.304	6.00127	496	Organic_acid	glycolic_acid	pm25	13	5.99
BE0007R	50.304	6.00127	496	Organic_acid	glycolic_acid	pm25	14	5.41
BE0007R	50.304	6.00127	496	Organic_acid	glycolic_acid	pm25	15	0.195
BE0007R	50.304	6.00127	496	Organic_acid	glycolic_acid	pm25	16	0.195
BE0007R	50.304	6.00127	496	Organic_acid	glycolic_acid	pm25	17	0.195
BE0007R	50.304	6.00127	496	Organic_acid	glycolic_acid	pm25	18	6.18
BE0007R	50.304	6.00127	496	Organic_acid	glycolic_acid	pm25	19	8.48
BE0007R	50.304	6.00127	496	Organic_acid	glyoxylic_acid	pm25	12	1.78
BE0007R	50.304	6.00127	496	Organic_acid	glyoxylic_acid	pm25	13	0.69
BE0007R	50.304	6.00127	496	Organic_acid	glyoxylic_acid	pm25	14	2.37
BE0007R	50.304	6.00127	496	Organic_acid	glyoxylic_acid	pm25	15	0.55
BE0007R	50.304	6.00127	496	Organic_acid	glyoxylic_acid	pm25	16	0.45
BE0007R	50.304	6.00127	496	Organic_acid	glyoxylic_acid	pm25	17	0.66
BE0007R	50.304	6.00127	496	Organic_acid	glyoxylic_acid	pm25	18	5.28
BE0007R	50.304	6.00127	496	Organic_acid	glyoxylic_acid	pm25	19	2.76
BE0007R	50.304	6.00127	496	Organic_acid	lactic_acid	pm25	12	1.42
BE0007R	50.304	6.00127	496	Organic_acid	lactic_acid	pm25	13	2.35
BE0007R	50.304	6.00127	496	Organic_acid	lactic_acid	pm25	14	5.21
BE0007R	50.304	6.00127	496	Organic_acid	lactic_acid	pm25	15	6.71
BE0007R	50.304	6.00127	496	Organic_acid	lactic_acid	pm25	16	4.35
BE0007R	50.304	6.00127	496	Organic_acid	lactic_acid	pm25	17	2.64
BE0007R	50.304	6.00127	496	Organic_acid	lactic_acid	pm25	18	2.62
BE0007R	50.304	6.00127	496	Organic_acid	lactic_acid	pm25	19	2.17
BE0007R	50.304	6.00127	496	Organic_acid	maleic_acid	pm25	12	0.195
BE0007R	50.304	6.00127	496	Organic_acid	maleic_acid	pm25	13	0.99
BE0007R	50.304	6.00127	496	Organic_acid	maleic_acid	pm25	14	1.07
BE0007R	50.304	6.00127	496	Organic_acid	maleic_acid	pm25	15	0.92
BE0007R	50.304	6.00127	496	Organic_acid	maleic_acid	pm25	16	0.195
BE0007R	50.304	6.00127	496	Organic_acid	maleic_acid	pm25	17	0.195
BE0007R	50.304	6.00127	496	Organic_acid	maleic_acid	pm25	18	0.87
BE0007R	50.304	6.00127	496	Organic_acid	maleic_acid	pm25	19	1.24
BE0007R	50.304	6.00127	496	Organic_acid	malic_acid	pm25	12	8.85
BE0007R	50.304	6.00127	496	Organic_acid	malic_acid	pm25	13	17.75
BE0007R	50.304	6.00127	496	Organic_acid	malic_acid	pm25	14	16.2
BE0007R	50.304	6.00127	496	Organic_acid	malic_acid	pm25	15	3.5
BE0007R	50.304	6.00127	496	Organic_acid	malic_acid	pm25	16	10.46
BE0007R	50.304	6.00127	496	Organic_acid	malic_acid	pm25	17	7.75
BE0007R	50.304	6.00127	496	Organic_acid	malic_acid	pm25	18	14.14
BE0007R	50.304	6.00127	496	Organic_acid	malic_acid	pm25	19	22.19
BE0007R	50.304	6.00127	496	Organic_acid	malonic_acid	pm25	12	4.04
BE0007R	50.304	6.00127	496	Organic_acid	malonic_acid	pm25	13	9.22
BE0007R	50.304	6.00127	496	Organic_acid	malonic_acid	pm25	14	10.52
BE0007R	50.304	6.00127	496	Organic_acid	malonic_acid	pm25	15	2.34
BE0007R	50.304	6.00127	496	Organic_acid	malonic_acid	pm25	16	6.29
BE0007R	50.304	6.00127	496	Organic_acid	malonic_acid	pm25	17	4.93
BE0007R	50.304	6.00127	496	Organic_acid	malonic_acid	pm25	18	13.72
BE0007R	50.304	6.00127	496	Organic_acid	malonic_acid	pm25	19	23.63
BE0007R	50.304	6.00127	496	Organic_acid	methanesulfonic_acid	pm25	12	12.98
BE0007R	50.304	6.00127	496	Organic_acid	methanesulfonic_acid	pm25	13	17.83
BE0007R	50.304	6.00127	496	Organic_acid	methanesulfonic_acid	pm25	14	49.84
BE0007R	50.304	6.00127	496	Organic_acid	methanesulfonic_acid	pm25	15	44.92
BE0007R	50.304	6.00127	496	Organic_acid	methanesulfonic_acid	pm25	16	39.24
BE0007R	50.304	6.00127	496	Organic_acid	methanesulfonic_acid	pm25	17	26.47
BE0007R	50.304	6.00127	496	Organic_acid	methanesulfonic_acid	pm25	18	17.97
BE0007R	50.304	6.00127	496	Organic_acid	methanesulfonic_acid	pm25	19	14.42
BE0007R	50.304	6.00127	496	Organic_acid	oxalic_acid	pm25	12	59.52
BE0007R	50.304	6.00127	496	Organic_acid	oxalic_acid	pm25	13	135.44
BE0007R	50.304	6.00127	496	Organic_acid	oxalic_acid	pm25	14	157.93
BE0007R	50.304	6.00127	496	Organic_acid	oxalic_acid	pm25	15	73.86
BE0007R	50.304	6.00127	496	Organic_acid	oxalic_acid	pm25	16	115.33
BE0007R	50.304	6.00127	496	Organic_acid	oxalic_acid	pm25	17	102.76
BE0007R	50.304	6.00127	496	Organic_acid	oxalic_acid	pm25	18	153.41
BE0007R	50.304	6.00127	496	Organic_acid	oxalic_acid	pm25	19	194.41
BE0007R	50.304	6.00127	496	Organic_acid	phthalic_acid	pm25	12	0.43
BE0007R	50.304	6.00127	496	Organic_acid	phthalic_acid	pm25	13	0.43
BE0007R	50.304	6.00127	496	Organic_acid	phthalic_acid	pm25	14	0.43
BE0007R	50.304	6.00127	496	Organic_acid	phthalic_acid	pm25	15	0.43
BE0007R	50.304	6.00127	496	Organic_acid	phthalic_acid	pm25	16	0.43
BE0007R	50.304	6.00127	496	Organic_acid	phthalic_acid	pm25	17	0.43
BE0007R	50.304	6.00127	496	Organic_acid	phthalic_acid	pm25	18	0.43
BE0007R	50.304	6.00127	496	Organic_acid	phthalic_acid	pm25	19	0.43
BE0007R	50.304	6.00127	496	Organic_acid	pimelic_acid	pm25	12	0.145
BE0007R	50.304	6.00127	496	Organic_acid	pimelic_acid	pm25	13	0.145
BE0007R	50.304	6.00127	496	Organic_acid	pimelic_acid	pm25	14	0.145
BE0007R	50.304	6.00127	496	Organic_acid	pimelic_acid	pm25	15	0.145
BE0007R	50.304	6.00127	496	Organic_acid	pimelic_acid	pm25	16	0.145
BE0007R	50.304	6.00127	496	Organic_acid	pimelic_acid	pm25	17	0.145
BE0007R	50.304	6.00127	496	Organic_acid	pimelic_acid	pm25	18	0.145
BE0007R	50.304	6.00127	496	Organic_acid	pimelic_acid	pm25	19	0.145
BE0007R	50.304	6.00127	496	Organic_acid	pinic_acid	pm25	12	6.65
BE0007R	50.304	6.00127	496	Organic_acid	pinic_acid	pm25	13	10.5
BE0007R	50.304	6.00127	496	Organic_acid	pinic_acid	pm25	14	7.23
BE0007R	50.304	6.00127	496	Organic_acid	pinic_acid	pm25	15	8.86
BE0007R	50.304	6.00127	496	Organic_acid	pinic_acid	pm25	16	15.99
BE0007R	50.304	6.00127	496	Organic_acid	pinic_acid	pm25	17	10.09
BE0007R	50.304	6.00127	496	Organic_acid	pinic_acid	pm25	18	16.62
BE0007R	50.304	6.00127	496	Organic_acid	pinic_acid	pm25	19	12.94
BE0007R	50.304	6.00127	496	Organic_acid	pyruvic_acid	pm25	12	1.84
BE0007R	50.304	6.00127	496	Organic_acid	pyruvic_acid	pm25	13	3.02
BE0007R	50.304	6.00127	496	Organic_acid	pyruvic_acid	pm25	14	3.1
BE0007R	50.304	6.00127	496	Organic_acid	pyruvic_acid	pm25	15	0.31
BE0007R	50.304	6.00127	496	Organic_acid	pyruvic_acid	pm25	16	2.29
BE0007R	50.304	6.00127	496	Organic_acid	pyruvic_acid	pm25	17	1.95
BE0007R	50.304	6.00127	496	Organic_acid	pyruvic_acid	pm25	18	2.62
BE0007R	50.304	6.00127	496	Organic_acid	pyruvic_acid	pm25	19	3.4
BE0007R	50.304	6.00127	496	Organic_acid	sebacic_acid	pm25	12	1.59
BE0007R	50.304	6.00127	496	Organic_acid	sebacic_acid	pm25	13	2.01
BE0007R	50.304	6.00127	496	Organic_acid	sebacic_acid	pm25	14	1.31
BE0007R	50.304	6.00127	496	Organic_acid	sebacic_acid	pm25	15	0.61
BE0007R	50.304	6.00127	496	Organic_acid	sebacic_acid	pm25	16	0.83
BE0007R	50.304	6.00127	496	Organic_acid	sebacic_acid	pm25	17	0.98
BE0007R	50.304	6.00127	496	Organic_acid	sebacic_acid	pm25	18	2.31
BE0007R	50.304	6.00127	496	Organic_acid	sebacic_acid	pm25	19	3.76
BE0007R	50.304	6.00127	496	Organic_acid	suberic_acid	pm25	12	2.05
BE0007R	50.304	6.00127	496	Organic_acid	suberic_acid	pm25	13	7.31
BE0007R	50.304	6.00127	496	Organic_acid	suberic_acid	pm25	14	4.37
BE0007R	50.304	6.00127	496	Organic_acid	suberic_acid	pm25	15	2.15
BE0007R	50.304	6.00127	496	Organic_acid	suberic_acid	pm25	16	1.71
BE0007R	50.304	6.00127	496	Organic_acid	suberic_acid	pm25	17	4.46
BE0007R	50.304	6.00127	496	Organic_acid	suberic_acid	pm25	18	4.23
BE0007R	50.304	6.00127	496	Organic_acid	suberic_acid	pm25	19	6.76
BE0007R	50.304	6.00127	496	Organic_acid	succinic_acid	pm25	12	0.705
BE0007R	50.304	6.00127	496	Organic_acid	succinic_acid	pm25	13	0.705
BE0007R	50.304	6.00127	496	Organic_acid	succinic_acid	pm25	14	0.705
BE0007R	50.304	6.00127	496	Organic_acid	succinic_acid	pm25	15	0.705
BE0007R	50.304	6.00127	496	Organic_acid	succinic_acid	pm25	16	0.705
BE0007R	50.304	6.00127	496	Organic_acid	succinic_acid	pm25	17	0.705
BE0007R	50.304	6.00127	496	Organic_acid	succinic_acid	pm25	18	0.705
BE0007R	50.304	6.00127	496	Organic_acid	succinic_acid	pm25	19	0.705
BE0007R	50.304	6.00127	496	Organic_acid	tartaric_acid	pm25	12	2.06
BE0007R	50.304	6.00127	496	Organic_acid	tartaric_acid	pm25	13	4.72
BE0007R	50.304	6.00127	496	Organic_acid	tartaric_acid	pm25	14	4.69
BE0007R	50.304	6.00127	496	Organic_acid	tartaric_acid	pm25	15	1.28
BE0007R	50.304	6.00127	496	Organic_acid	tartaric_acid	pm25	16	3.54
BE0007R	50.304	6.00127	496	Organic_acid	tartaric_acid	pm25	17	3.38
BE0007R	50.304	6.00127	496	Organic_acid	tartaric_acid	pm25	18	4.17
BE0007R	50.304	6.00127	496	Organic_acid	tartaric_acid	pm25	19	5.26
BE0007R	50.304	6.00127	496	O-VOCs	2-methylpropenal	air	12	37.4186
BE0007R	50.304	6.00127	496	O-VOCs	2-methylpropenal	air	13	111.616
BE0007R	50.304	6.00127	496	O-VOCs	2-methylpropenal	air	14	49.8915
BE0007R	50.304	6.00127	496	O-VOCs	2-methylpropenal	air	15	24.6259
BE0007R	50.304	6.00127	496	O-VOCs	2-methylpropenal	air	16	39.3375
BE0007R	50.304	6.00127	496	O-VOCs	2-methylpropenal	air	17	69.7202
BE0007R	50.304	6.00127	496	O-VOCs	2-methylpropenal	air	18	117.693
BE0007R	50.304	6.00127	496	O-VOCs	2-methylpropenal	air	19	99.1434
BE0007R	50.304	6.00127	496	O-VOCs	2-oxopropanal	air	12	148.376
BE0007R	50.304	6.00127	496	O-VOCs	2-oxopropanal	air	13	205.611
BE0007R	50.304	6.00127	496	O-VOCs	2-oxopropanal	air	14	73.4104
BE0007R	50.304	6.00127	496	O-VOCs	2-oxopropanal	air	15	52.5693
BE0007R	50.304	6.00127	496	O-VOCs	2-oxopropanal	air	16	35.772
BE0007R	50.304	6.00127	496	O-VOCs	2-oxopropanal	air	17	111.049
BE0007R	50.304	6.00127	496	O-VOCs	2-oxopropanal	air	18	216.81
BE0007R	50.304	6.00127	496	O-VOCs	2-oxopropanal	air	19	272.179
BE0007R	50.304	6.00127	496	O-VOCs	3-buten-2-one	air	12	135.922
BE0007R	50.304	6.00127	496	O-VOCs	3-buten-2-one	air	13	368.43
BE0007R	50.304	6.00127	496	O-VOCs	3-buten-2-one	air	14	162.147
BE0007R	50.304	6.00127	496	O-VOCs	3-buten-2-one	air	15	89.229
BE0007R	50.304	6.00127	496	O-VOCs	3-buten-2-one	air	16	118.652
BE0007R	50.304	6.00127	496	O-VOCs	3-buten-2-one	air	17	212.039
BE0007R	50.304	6.00127	496	O-VOCs	3-buten-2-one	air	18	384.101
BE0007R	50.304	6.00127	496	O-VOCs	3-buten-2-one	air	19	365.871
BE0007R	50.304	6.00127	496	O-VOCs	butanone	air	12	88.662
BE0007R	50.304	6.00127	496	O-VOCs	butanone	air	13	134.541
BE0007R	50.304	6.00127	496	O-VOCs	butanone	air	14	156.777
BE0007R	50.304	6.00127	496	O-VOCs	butanone	air	15	56.2933
BE0007R	50.304	6.00127	496	O-VOCs	butanone	air	16	86.1288
BE0007R	50.304	6.00127	496	O-VOCs	butanone	air	17	104.706
BE0007R	50.304	6.00127	496	O-VOCs	butanone	air	18	103.017
BE0007R	50.304	6.00127	496	O-VOCs	butanone	air	19	109.772
BE0007R	50.304	6.00127	496	O-VOCs	ethanal	air	12	766.842
BE0007R	50.304	6.00127	496	O-VOCs	ethanal	air	13	1121.51
BE0007R	50.304	6.00127	496	O-VOCs	ethanal	air	14	814.674
BE0007R	50.304	6.00127	496	O-VOCs	ethanal	air	15	478.831
BE0007R	50.304	6.00127	496	O-VOCs	ethanal	air	16	561.265
BE0007R	50.304	6.00127	496	O-VOCs	ethanal	air	17	820.271
BE0007R	50.304	6.00127	496	O-VOCs	ethanal	air	18	992.773
BE0007R	50.304	6.00127	496	O-VOCs	ethanal	air	19	1150.52
BE0007R	50.304	6.00127	496	O-VOCs	ethanedial	air	12	76.4708
BE0007R	50.304	6.00127	496	O-VOCs	ethanedial	air	13	152.555
BE0007R	50.304	6.00127	496	O-VOCs	ethanedial	air	14	61.4084
BE0007R	50.304	6.00127	496	O-VOCs	ethanedial	air	15	67.5879
BE0007R	50.304	6.00127	496	O-VOCs	ethanedial	air	16	53.6841
BE0007R	50.304	6.00127	496	O-VOCs	ethanedial	air	17	105.051
BE0007R	50.304	6.00127	496	O-VOCs	ethanedial	air	18	152.169
BE0007R	50.304	6.00127	496	O-VOCs	ethanedial	air	19	185.384
BE0007R	50.304	6.00127	496	O-VOCs	methanal	air	12	1693.18
BE0007R	50.304	6.00127	496	O-VOCs	methanal	air	13	3074.31
BE0007R	50.304	6.00127	496	O-VOCs	methanal	air	14	2030.62
BE0007R	50.304	6.00127	496	O-VOCs	methanal	air	15	1313.93
BE0007R	50.304	6.00127	496	O-VOCs	methanal	air	16	1619.27
BE0007R	50.304	6.00127	496	O-VOCs	methanal	air	17	2699.54
BE0007R	50.304	6.00127	496	O-VOCs	methanal	air	18	3334.85
BE0007R	50.304	6.00127	496	O-VOCs	methanal	air	19	3936.57
BE0007R	50.304	6.00127	496	O-VOCs	propanal	air	12	100.347
BE0007R	50.304	6.00127	496	O-VOCs	propanal	air	13	123.504
BE0007R	50.304	6.00127	496	O-VOCs	propanal	air	14	116.557
BE0007R	50.304	6.00127	496	O-VOCs	propanal	air	15	81.4355
BE0007R	50.304	6.00127	496	O-VOCs	propanal	air	16	103.821
BE0007R	50.304	6.00127	496	O-VOCs	propanal	air	17	103.049
BE0007R	50.304	6.00127	496	O-VOCs	propanal	air	18	138.556
BE0007R	50.304	6.00127	496	O-VOCs	propanal	air	19	147.047
BE0007R	50.304	6.00127	496	O-VOCs	propanone	air	12	1500.58
BE0007R	50.304	6.00127	496	O-VOCs	propanone	air	13	2027.78
BE0007R	50.304	6.00127	496	O-VOCs	propanone	air	14	1779.23
BE0007R	50.304	6.00127	496	O-VOCs	propanone	air	15	1302.58
BE0007R	50.304	6.00127	496	O-VOCs	propanone	air	16	1580.85
BE0007R	50.304	6.00127	496	O-VOCs	propanone	air	17	2068.31
BE0007R	50.304	6.00127	496	O-VOCs	propanone	air	18	2634.5
BE0007R	50.304	6.00127	496	O-VOCs	propanone	air	19	2773.44
BE0007R	50.304	6.00127	496	PBAP	adonitol	pm25	12	0.005
BE0007R	50.304	6.00127	496	PBAP	adonitol	pm25	13	0.005
BE0007R	50.304	6.00127	496	PBAP	adonitol	pm25	14	0.005
BE0007R	50.304	6.00127	496	PBAP	adonitol	pm25	15	0.005
BE0007R	50.304	6.00127	496	PBAP	adonitol	pm25	16	0.005
BE0007R	50.304	6.00127	496	PBAP	adonitol	pm25	17	0.005
BE0007R	50.304	6.00127	496	PBAP	adonitol	pm25	18	0.005
BE0007R	50.304	6.00127	496	PBAP	adonitol	pm25	19	0.005
BE0007R	50.304	6.00127	496	PBAP	arabitol	pm25	12	0.08
BE0007R	50.304	6.00127	496	PBAP	arabitol	pm25	13	0.1
BE0007R	50.304	6.00127	496	PBAP	arabitol	pm25	14	0.08
BE0007R	50.304	6.00127	496	PBAP	arabitol	pm25	15	0.08
BE0007R	50.304	6.00127	496	PBAP	arabitol	pm25	16	0.08
BE0007R	50.304	6.00127	496	PBAP	arabitol	pm25	17	0.08
BE0007R	50.304	6.00127	496	PBAP	arabitol	pm25	18	0.31
BE0007R	50.304	6.00127	496	PBAP	arabitol	pm25	19	0.27
BE0007R	50.304	6.00127	496	PBAP	fructose	pm25	12	0.18
BE0007R	50.304	6.00127	496	PBAP	fructose	pm25	13	0.41
BE0007R	50.304	6.00127	496	PBAP	fructose	pm25	14	0.18
BE0007R	50.304	6.00127	496	PBAP	fructose	pm25	15	0.18
BE0007R	50.304	6.00127	496	PBAP	fructose	pm25	16	0.18
BE0007R	50.304	6.00127	496	PBAP	fructose	pm25	17	0.97
BE0007R	50.304	6.00127	496	PBAP	fructose	pm25	18	0.17
BE0007R	50.304	6.00127	496	PBAP	fructose	pm25	19	0.58
BE0007R	50.304	6.00127	496	PBAP	glucose	pm25	12	0.405
BE0007R	50.304	6.00127	496	PBAP	glucose	pm25	13	0.405
BE0007R	50.304	6.00127	496	PBAP	glucose	pm25	14	0.405
BE0007R	50.304	6.00127	496	PBAP	glucose	pm25	15	0.405
BE0007R	50.304	6.00127	496	PBAP	glucose	pm25	16	0.405
BE0007R	50.304	6.00127	496	PBAP	glucose	pm25	17	0.405
BE0007R	50.304	6.00127	496	PBAP	glucose	pm25	18	0.405
BE0007R	50.304	6.00127	496	PBAP	glucose	pm25	19	0.405
BE0007R	50.304	6.00127	496	PBAP	inositol	pm25	12	0.22
BE0007R	50.304	6.00127	496	PBAP	inositol	pm25	13	0.22
BE0007R	50.304	6.00127	496	PBAP	inositol	pm25	14	0.22
BE0007R	50.304	6.00127	496	PBAP	inositol	pm25	15	0.22
BE0007R	50.304	6.00127	496	PBAP	inositol	pm25	16	0.22
BE0007R	50.304	6.00127	496	PBAP	inositol	pm25	17	0.22
BE0007R	50.304	6.00127	496	PBAP	inositol	pm25	18	0.22
BE0007R	50.304	6.00127	496	PBAP	inositol	pm25	19	0.22
BE0007R	50.304	6.00127	496	PBAP	lactose	pm25	12	0.065
BE0007R	50.304	6.00127	496	PBAP	lactose	pm25	13	0.065
BE0007R	50.304	6.00127	496	PBAP	lactose	pm25	14	0.065
BE0007R	50.304	6.00127	496	PBAP	lactose	pm25	15	0.065
BE0007R	50.304	6.00127	496	PBAP	lactose	pm25	16	0.065
BE0007R	50.304	6.00127	496	PBAP	lactose	pm25	17	0.065
BE0007R	50.304	6.00127	496	PBAP	lactose	pm25	18	0.065
BE0007R	50.304	6.00127	496	PBAP	lactose	pm25	19	0.065
BE0007R	50.304	6.00127	496	PBAP	maltose	pm25	12	0.23
BE0007R	50.304	6.00127	496	PBAP	maltose	pm25	13	0.23
BE0007R	50.304	6.00127	496	PBAP	maltose	pm25	14	0.23
BE0007R	50.304	6.00127	496	PBAP	maltose	pm25	15	0.23
BE0007R	50.304	6.00127	496	PBAP	maltose	pm25	16	0.23
BE0007R	50.304	6.00127	496	PBAP	maltose	pm25	17	0.23
BE0007R	50.304	6.00127	496	PBAP	maltose	pm25	18	2.64
BE0007R	50.304	6.00127	496	PBAP	maltose	pm25	19	0.23
BE0007R	50.304	6.00127	496	PBAP	mannitol	pm25	12	0.29
BE0007R	50.304	6.00127	496	PBAP	mannitol	pm25	13	0.29
BE0007R	50.304	6.00127	496	PBAP	mannitol	pm25	14	0.29
BE0007R	50.304	6.00127	496	PBAP	mannitol	pm25	15	0.29
BE0007R	50.304	6.00127	496	PBAP	mannitol	pm25	16	0.29
BE0007R	50.304	6.00127	496	PBAP	mannitol	pm25	17	0.29
BE0007R	50.304	6.00127	496	PBAP	mannitol	pm25	18	0.29
BE0007R	50.304	6.00127	496	PBAP	mannitol	pm25	19	0.29
BE0007R	50.304	6.00127	496	PBAP	mannose	pm25	12	0.29
BE0007R	50.304	6.00127	496	PBAP	mannose	pm25	13	4.43
BE0007R	50.304	6.00127	496	PBAP	mannose	pm25	14	0.29
BE0007R	50.304	6.00127	496	PBAP	mannose	pm25	15	0.29
BE0007R	50.304	6.00127	496	PBAP	mannose	pm25	16	0.29
BE0007R	50.304	6.00127	496	PBAP	mannose	pm25	17	0.29
BE0007R	50.304	6.00127	496	PBAP	mannose	pm25	18	0.29
BE0007R	50.304	6.00127	496	PBAP	mannose	pm25	19	0.29
BE0007R	50.304	6.00127	496	PBAP	melezitose	pm25	12	0.035
BE0007R	50.304	6.00127	496	PBAP	melezitose	pm25	13	0.035
BE0007R	50.304	6.00127	496	PBAP	melezitose	pm25	14	0.035
BE0007R	50.304	6.00127	496	PBAP	melezitose	pm25	15	0.035
BE0007R	50.304	6.00127	496	PBAP	melezitose	pm25	16	0.035
BE0007R	50.304	6.00127	496	PBAP	melezitose	pm25	17	0.035
BE0007R	50.304	6.00127	496	PBAP	melezitose	pm25	18	0.035
BE0007R	50.304	6.00127	496	PBAP	melezitose	pm25	19	0.035
BE0007R	50.304	6.00127	496	PBAP	rhamnose	pm25	12	2.61
BE0007R	50.304	6.00127	496	PBAP	rhamnose	pm25	13	1.77
BE0007R	50.304	6.00127	496	PBAP	rhamnose	pm25	14	6.05
BE0007R	50.304	6.00127	496	PBAP	rhamnose	pm25	15	2.87
BE0007R	50.304	6.00127	496	PBAP	rhamnose	pm25	16	3.27
BE0007R	50.304	6.00127	496	PBAP	rhamnose	pm25	17	2.4
BE0007R	50.304	6.00127	496	PBAP	rhamnose	pm25	18	0.29
BE0007R	50.304	6.00127	496	PBAP	rhamnose	pm25	19	0.29
BE0007R	50.304	6.00127	496	PBAP	sorbitol	pm25	12	0.1
BE0007R	50.304	6.00127	496	PBAP	sorbitol	pm25	13	0.1
BE0007R	50.304	6.00127	496	PBAP	sorbitol	pm25	14	0.1
BE0007R	50.304	6.00127	496	PBAP	sorbitol	pm25	15	0.1
BE0007R	50.304	6.00127	496	PBAP	sorbitol	pm25	16	0.1
BE0007R	50.304	6.00127	496	PBAP	sorbitol	pm25	17	0.1
BE0007R	50.304	6.00127	496	PBAP	sorbitol	pm25	18	0.1
BE0007R	50.304	6.00127	496	PBAP	sorbitol	pm25	19	0.1
BE0007R	50.304	6.00127	496	PBAP	sucrose	pm25	12	0.63
BE0007R	50.304	6.00127	496	PBAP	sucrose	pm25	13	0.63
BE0007R	50.304	6.00127	496	PBAP	sucrose	pm25	14	0.63
BE0007R	50.304	6.00127	496	PBAP	sucrose	pm25	15	0.63
BE0007R	50.304	6.00127	496	PBAP	sucrose	pm25	16	0.63
BE0007R	50.304	6.00127	496	PBAP	sucrose	pm25	17	0.63
BE0007R	50.304	6.00127	496	PBAP	sucrose	pm25	18	0.63
BE0007R	50.304	6.00127	496	PBAP	sucrose	pm25	19	0.63
BE0007R	50.304	6.00127	496	PM	EC/TC	pm25	12	5.97015
BE0007R	50.304	6.00127	496	PM	EC/TC	pm25	13	6.77966
BE0007R	50.304	6.00127	496	PM	EC/TC	pm25	14	8.82353
BE0007R	50.304	6.00127	496	PM	EC/TC	pm25	15	7.31707
BE0007R	50.304	6.00127	496	PM	EC/TC	pm25	16	5.42169
BE0007R	50.304	6.00127	496	PM	EC/TC	pm25	17	7.26257
BE0007R	50.304	6.00127	496	PM	EC/TC	pm25	18	5.53191
BE0007R	50.304	6.00127	496	PM	EC/TC	pm25	19	5.29801
BE0007R	50.304	6.00127	496	PM	elemental_carbon	pm25	12	0.08
BE0007R	50.304	6.00127	496	PM	elemental_carbon	pm25	13	0.16
BE0007R	50.304	6.00127	496	PM	elemental_carbon	pm25	14	0.21
BE0007R	50.304	6.00127	496	PM	elemental_carbon	pm25	15	0.09
BE0007R	50.304	6.00127	496	PM	elemental_carbon	pm25	16	0.09
BE0007R	50.304	6.00127	496	PM	elemental_carbon	pm25	17	0.13
BE0007R	50.304	6.00127	496	PM	elemental_carbon	pm25	18	0.13
BE0007R	50.304	6.00127	496	PM	elemental_carbon	pm25	19	0.16
BE0007R	50.304	6.00127	496	PM	organic_carbon	pm25	12	1.26
BE0007R	50.304	6.00127	496	PM	organic_carbon	pm25	13	2.2
BE0007R	50.304	6.00127	496	PM	organic_carbon	pm25	14	2.17
BE0007R	50.304	6.00127	496	PM	organic_carbon	pm25	15	1.14
BE0007R	50.304	6.00127	496	PM	organic_carbon	pm25	16	1.57
BE0007R	50.304	6.00127	496	PM	organic_carbon	pm25	17	1.66
BE0007R	50.304	6.00127	496	PM	organic_carbon	pm25	18	2.22
BE0007R	50.304	6.00127	496	PM	organic_carbon	pm25	19	2.86
BE0007R	50.304	6.00127	496	Sesquiterpenes	alpha-humulene	air	12	0
BE0007R	50.304	6.00127	496	Sesquiterpenes	alpha-humulene	air	13	0.0877553
BE0007R	50.304	6.00127	496	Sesquiterpenes	alpha-humulene	air	14	0
BE0007R	50.304	6.00127	496	Sesquiterpenes	alpha-humulene	air	15	0
BE0007R	50.304	6.00127	496	Sesquiterpenes	alpha-humulene	air	16	0
BE0007R	50.304	6.00127	496	Sesquiterpenes	alpha-humulene	air	17	0
BE0007R	50.304	6.00127	496	Sesquiterpenes	alpha-humulene	air	18	0
BE0007R	50.304	6.00127	496	Sesquiterpenes	alpha-humulene	air	19	0
BE0007R	50.304	6.00127	496	Sesquiterpenes	beta-caryophyllene	air	12	0
BE0007R	50.304	6.00127	496	Sesquiterpenes	beta-caryophyllene	air	13	1.00919
BE0007R	50.304	6.00127	496	Sesquiterpenes	beta-caryophyllene	air	14	0.438777
BE0007R	50.304	6.00127	496	Sesquiterpenes	beta-caryophyllene	air	15	0.0987247
BE0007R	50.304	6.00127	496	Sesquiterpenes	beta-caryophyllene	air	16	0.318113
BE0007R	50.304	6.00127	496	Sesquiterpenes	beta-caryophyllene	air	17	0.548471
BE0007R	50.304	6.00127	496	Sesquiterpenes	beta-caryophyllene	air	18	1.03113
BE0007R	50.304	6.00127	496	Sesquiterpenes	beta-caryophyllene	air	19	1.23954
BE0007R	50.304	6.00127	496	Sesquiterpenes	beta-farnesene	air	12	7.8541
BE0007R	50.304	6.00127	496	Sesquiterpenes	beta-farnesene	air	13	1.96353
BE0007R	50.304	6.00127	496	Sesquiterpenes	beta-farnesene	air	14	0.822706
BE0007R	50.304	6.00127	496	Sesquiterpenes	beta-farnesene	air	15	0.164541
BE0007R	50.304	6.00127	496	Sesquiterpenes	beta-farnesene	air	16	1.59057
BE0007R	50.304	6.00127	496	Sesquiterpenes	beta-farnesene	air	17	0
BE0007R	50.304	6.00127	496	Sesquiterpenes	beta-farnesene	air	18	0.778828
BE0007R	50.304	6.00127	496	Sesquiterpenes	beta-farnesene	air	19	5.8467
BE0007R	50.304	6.00127	496	Sesquiterpenes	iso-longifolene	air	12	0.175511
BE0007R	50.304	6.00127	496	Sesquiterpenes	iso-longifolene	air	13	0.175511
BE0007R	50.304	6.00127	496	Sesquiterpenes	iso-longifolene	air	14	0.0219388
BE0007R	50.304	6.00127	496	Sesquiterpenes	iso-longifolene	air	15	0.0219388
BE0007R	50.304	6.00127	496	Sesquiterpenes	iso-longifolene	air	16	0.0109694
BE0007R	50.304	6.00127	496	Sesquiterpenes	iso-longifolene	air	17	0.0658165
BE0007R	50.304	6.00127	496	Sesquiterpenes	iso-longifolene	air	18	0.0548471
BE0007R	50.304	6.00127	496	Sesquiterpenes	iso-longifolene	air	19	0.0658165
BE0007R	50.304	6.00127	496	Sesquiterpenes	longicyclene	air	12	0.548471
BE0007R	50.304	6.00127	496	Sesquiterpenes	longicyclene	air	13	0.888523
BE0007R	50.304	6.00127	496	Sesquiterpenes	longicyclene	air	14	0.263266
BE0007R	50.304	6.00127	496	Sesquiterpenes	longicyclene	air	15	0.197449
BE0007R	50.304	6.00127	496	Sesquiterpenes	longicyclene	air	16	0.241327
BE0007R	50.304	6.00127	496	Sesquiterpenes	longicyclene	air	17	0.274235
BE0007R	50.304	6.00127	496	Sesquiterpenes	longicyclene	air	18	0.800767
BE0007R	50.304	6.00127	496	Sesquiterpenes	longicyclene	air	19	0.614287
CH0010U	47.3776	8.53042	409	Aromatics	benzene	air	12	57.75
CH0010U	47.3776	8.53042	409	Aromatics	benzene	air	13	73.5
CH0010U	47.3776	8.53042	409	Aromatics	benzene	air	14	80.5
CH0010U	47.3776	8.53042	409	Aromatics	benzene	air	15	79.5
CH0010U	47.3776	8.53042	409	Aromatics	benzene	air	16	63.5
CH0010U	47.3776	8.53042	409	Aromatics	benzene	air	17	55.9584
CH0010U	47.3776	8.53042	409	Aromatics	benzene	air	18	63.75
CH0010U	47.3776	8.53042	409	Aromatics	benzene	air	19	80.75
CH0010U	47.3776	8.53042	409	Aromatics	ethylbenzene	air	12	23.5
CH0010U	47.3776	8.53042	409	Aromatics	ethylbenzene	air	13	34.2916
CH0010U	47.3776	8.53042	409	Aromatics	ethylbenzene	air	14	34.5
CH0010U	47.3776	8.53042	409	Aromatics	ethylbenzene	air	15	21.25
CH0010U	47.3776	8.53042	409	Aromatics	ethylbenzene	air	16	16.25
CH0010U	47.3776	8.53042	409	Aromatics	ethylbenzene	air	17	10.3334
CH0010U	47.3776	8.53042	409	Aromatics	ethylbenzene	air	18	20.25
CH0010U	47.3776	8.53042	409	Aromatics	ethylbenzene	air	19	29.75
CH0010U	47.3776	8.53042	409	Aromatics	m-p-xylene	air	12	78
CH0010U	47.3776	8.53042	409	Aromatics	m-p-xylene	air	13	81.5
CH0010U	47.3776	8.53042	409	Aromatics	m-p-xylene	air	14	112.25
CH0010U	47.3776	8.53042	409	Aromatics	m-p-xylene	air	15	69.25
CH0010U	47.3776	8.53042	409	Aromatics	m-p-xylene	air	16	52.75
CH0010U	47.3776	8.53042	409	Aromatics	m-p-xylene	air	17	36.1668
CH0010U	47.3776	8.53042	409	Aromatics	m-p-xylene	air	18	71.75
CH0010U	47.3776	8.53042	409	Aromatics	m-p-xylene	air	19	82
CH0010U	47.3776	8.53042	409	Aromatics	o-xylene	air	12	30.5
CH0010U	47.3776	8.53042	409	Aromatics	o-xylene	air	13	35.9167
CH0010U	47.3776	8.53042	409	Aromatics	o-xylene	air	14	40.75
CH0010U	47.3776	8.53042	409	Aromatics	o-xylene	air	15	26.25
CH0010U	47.3776	8.53042	409	Aromatics	o-xylene	air	16	19.5
CH0010U	47.3776	8.53042	409	Aromatics	o-xylene	air	17	13.625
CH0010U	47.3776	8.53042	409	Aromatics	o-xylene	air	18	27.75
CH0010U	47.3776	8.53042	409	Aromatics	o-xylene	air	19	34.5
CH0010U	47.3776	8.53042	409	Aromatics	toluene	air	12	222.75
CH0010U	47.3776	8.53042	409	Aromatics	toluene	air	13	221.958
CH0010U	47.3776	8.53042	409	Aromatics	toluene	air	14	261
CH0010U	47.3776	8.53042	409	Aromatics	toluene	air	15	178.5
CH0010U	47.3776	8.53042	409	Aromatics	toluene	air	16	114.75
CH0010U	47.3776	8.53042	409	Aromatics	toluene	air	17	83.2918
CH0010U	47.3776	8.53042	409	Aromatics	toluene	air	18	163.5
CH0010U	47.3776	8.53042	409	Aromatics	toluene	air	19	229.75
CH0010U	47.3776	8.53042	409	Isoprene	isoprene	air	12	164.75
CH0010U	47.3776	8.53042	409	Isoprene	isoprene	air	13	595.209
CH0010U	47.3776	8.53042	409	Isoprene	isoprene	air	14	625
CH0010U	47.3776	8.53042	409	Isoprene	isoprene	air	15	211.5
CH0010U	47.3776	8.53042	409	Isoprene	isoprene	air	16	191.25
CH0010U	47.3776	8.53042	409	Isoprene	isoprene	air	17	262.584
CH0010U	47.3776	8.53042	409	Isoprene	isoprene	air	18	278.75
CH0010U	47.3776	8.53042	409	Isoprene	isoprene	air	19	391.5
CH0010U	47.3776	8.53042	409	methanol	methanol	air	12	3129.75
CH0010U	47.3776	8.53042	409	methanol	methanol	air	13	4037.79
CH0010U	47.3776	8.53042	409	methanol	methanol	air	14	6171.75
CH0010U	47.3776	8.53042	409	methanol	methanol	air	15	4711.75
CH0010U	47.3776	8.53042	409	methanol	methanol	air	16	3961.75
CH0010U	47.3776	8.53042	409	methanol	methanol	air	17	4241.25
CH0010U	47.3776	8.53042	409	methanol	methanol	air	18	4370.75
CH0010U	47.3776	8.53042	409	methanol	methanol	air	19	5802.5
CH0010U	47.3776	8.53042	409	NMHC (C2-C6)	1-3-butadiene	air	12	3
CH0010U	47.3776	8.53042	409	NMHC (C2-C6)	1-3-butadiene	air	13	0.25
CH0010U	47.3776	8.53042	409	NMHC (C2-C6)	1-3-butadiene	air	14	5.25
CH0010U	47.3776	8.53042	409	NMHC (C2-C6)	1-3-butadiene	air	15	3.25
CH0010U	47.3776	8.53042	409	NMHC (C2-C6)	1-3-butadiene	air	16	0.5
CH0010U	47.3776	8.53042	409	NMHC (C2-C6)	1-3-butadiene	air	17	0
CH0010U	47.3776	8.53042	409	NMHC (C2-C6)	1-3-butadiene	air	18	4.25
CH0010U	47.3776	8.53042	409	NMHC (C2-C6)	1-3-butadiene	air	19	0
CH0010U	47.3776	8.53042	409	NMHC (C2-C6)	2-methylbutane	air	12	337.25
CH0010U	47.3776	8.53042	409	NMHC (C2-C6)	2-methylbutane	air	13	508.375
CH0010U	47.3776	8.53042	409	NMHC (C2-C6)	2-methylbutane	air	14	687.5
CH0010U	47.3776	8.53042	409	NMHC (C2-C6)	2-methylbutane	air	15	374
CH0010U	47.3776	8.53042	409	NMHC (C2-C6)	2-methylbutane	air	16	259.75
CH0010U	47.3776	8.53042	409	NMHC (C2-C6)	2-methylbutane	air	17	228.959
CH0010U	47.3776	8.53042	409	NMHC (C2-C6)	2-methylbutane	air	18	469.5
CH0010U	47.3776	8.53042	409	NMHC (C2-C6)	2-methylbutane	air	19	775.75
CH0010U	47.3776	8.53042	409	NMHC (C2-C6)	2-methylpropane	air	12	143
CH0010U	47.3776	8.53042	409	NMHC (C2-C6)	2-methylpropane	air	13	251.417
CH0010U	47.3776	8.53042	409	NMHC (C2-C6)	2-methylpropane	air	14	252.75
CH0010U	47.3776	8.53042	409	NMHC (C2-C6)	2-methylpropane	air	15	279.5
CH0010U	47.3776	8.53042	409	NMHC (C2-C6)	2-methylpropane	air	16	136.75
CH0010U	47.3776	8.53042	409	NMHC (C2-C6)	2-methylpropane	air	17	111.333
CH0010U	47.3776	8.53042	409	NMHC (C2-C6)	2-methylpropane	air	18	171.5
CH0010U	47.3776	8.53042	409	NMHC (C2-C6)	2-methylpropane	air	19	251.25
CH0010U	47.3776	8.53042	409	NMHC (C2-C6)	butenes	air	12	72.75
CH0010U	47.3776	8.53042	409	NMHC (C2-C6)	butenes	air	13	65.2917
CH0010U	47.3776	8.53042	409	NMHC (C2-C6)	butenes	air	14	95.25
CH0010U	47.3776	8.53042	409	NMHC (C2-C6)	butenes	air	15	77.75
CH0010U	47.3776	8.53042	409	NMHC (C2-C6)	butenes	air	16	59.25
CH0010U	47.3776	8.53042	409	NMHC (C2-C6)	butenes	air	17	51.4167
CH0010U	47.3776	8.53042	409	NMHC (C2-C6)	butenes	air	18	77.25
CH0010U	47.3776	8.53042	409	NMHC (C2-C6)	butenes	air	19	75
CH0010U	47.3776	8.53042	409	NMHC (C2-C6)	ethane	air	12	730.75
CH0010U	47.3776	8.53042	409	NMHC (C2-C6)	ethane	air	13	742.417
CH0010U	47.3776	8.53042	409	NMHC (C2-C6)	ethane	air	14	775.75
CH0010U	47.3776	8.53042	409	NMHC (C2-C6)	ethane	air	15	1056
CH0010U	47.3776	8.53042	409	NMHC (C2-C6)	ethane	air	16	958
CH0010U	47.3776	8.53042	409	NMHC (C2-C6)	ethane	air	17	962.875
CH0010U	47.3776	8.53042	409	NMHC (C2-C6)	ethane	air	18	886
CH0010U	47.3776	8.53042	409	NMHC (C2-C6)	ethane	air	19	878.75
CH0010U	47.3776	8.53042	409	NMHC (C2-C6)	ethene	air	12	334.75
CH0010U	47.3776	8.53042	409	NMHC (C2-C6)	ethene	air	13	362.708
CH0010U	47.3776	8.53042	409	NMHC (C2-C6)	ethene	air	14	389
CH0010U	47.3776	8.53042	409	NMHC (C2-C6)	ethene	air	15	361
CH0010U	47.3776	8.53042	409	NMHC (C2-C6)	ethene	air	16	312.75
CH0010U	47.3776	8.53042	409	NMHC (C2-C6)	ethene	air	17	283.583
CH0010U	47.3776	8.53042	409	NMHC (C2-C6)	ethene	air	18	337
CH0010U	47.3776	8.53042	409	NMHC (C2-C6)	ethene	air	19	351
CH0010U	47.3776	8.53042	409	NMHC (C2-C6)	ethyne	air	12	234.25
CH0010U	47.3776	8.53042	409	NMHC (C2-C6)	ethyne	air	13	357.125
CH0010U	47.3776	8.53042	409	NMHC (C2-C6)	ethyne	air	14	372.25
CH0010U	47.3776	8.53042	409	NMHC (C2-C6)	ethyne	air	15	339
CH0010U	47.3776	8.53042	409	NMHC (C2-C6)	ethyne	air	16	289.5
CH0010U	47.3776	8.53042	409	NMHC (C2-C6)	ethyne	air	17	263.625
CH0010U	47.3776	8.53042	409	NMHC (C2-C6)	ethyne	air	18	329
CH0010U	47.3776	8.53042	409	NMHC (C2-C6)	ethyne	air	19	339.5
CH0010U	47.3776	8.53042	409	NMHC (C2-C6)	isohexanes	air	12	159.75
CH0010U	47.3776	8.53042	409	NMHC (C2-C6)	isohexanes	air	13	225.417
CH0010U	47.3776	8.53042	409	NMHC (C2-C6)	isohexanes	air	14	284.5
CH0010U	47.3776	8.53042	409	NMHC (C2-C6)	isohexanes	air	15	189.25
CH0010U	47.3776	8.53042	409	NMHC (C2-C6)	isohexanes	air	16	142
CH0010U	47.3776	8.53042	409	NMHC (C2-C6)	isohexanes	air	17	121.375
CH0010U	47.3776	8.53042	409	NMHC (C2-C6)	isohexanes	air	18	197.75
CH0010U	47.3776	8.53042	409	NMHC (C2-C6)	isohexanes	air	19	280.75
CH0010U	47.3776	8.53042	409	NMHC (C2-C6)	n-butane	air	12	300.25
CH0010U	47.3776	8.53042	409	NMHC (C2-C6)	n-butane	air	13	459.917
CH0010U	47.3776	8.53042	409	NMHC (C2-C6)	n-butane	air	14	580
CH0010U	47.3776	8.53042	409	NMHC (C2-C6)	n-butane	air	15	557
CH0010U	47.3776	8.53042	409	NMHC (C2-C6)	n-butane	air	16	278
CH0010U	47.3776	8.53042	409	NMHC (C2-C6)	n-butane	air	17	242.667
CH0010U	47.3776	8.53042	409	NMHC (C2-C6)	n-butane	air	18	369.5
CH0010U	47.3776	8.53042	409	NMHC (C2-C6)	n-butane	air	19	570.25
CH0010U	47.3776	8.53042	409	NMHC (C2-C6)	n-hexane	air	12	22.5
CH0010U	47.3776	8.53042	409	NMHC (C2-C6)	n-hexane	air	13	29.5
CH0010U	47.3776	8.53042	409	NMHC (C2-C6)	n-hexane	air	14	36.5
CH0010U	47.3776	8.53042	409	NMHC (C2-C6)	n-hexane	air	15	27.5
CH0010U	47.3776	8.53042	409	NMHC (C2-C6)	n-hexane	air	16	21.75
CH0010U	47.3776	8.53042	409	NMHC (C2-C6)	n-hexane	air	17	17.9584
CH0010U	47.3776	8.53042	409	NMHC (C2-C6)	n-hexane	air	18	26.5
CH0010U	47.3776	8.53042	409	NMHC (C2-C6)	n-hexane	air	19	38
CH0010U	47.3776	8.53042	409	NMHC (C2-C6)	n-pentane	air	12	90
CH0010U	47.3776	8.53042	409	NMHC (C2-C6)	n-pentane	air	13	149.333
CH0010U	47.3776	8.53042	409	NMHC (C2-C6)	n-pentane	air	14	181.25
CH0010U	47.3776	8.53042	409	NMHC (C2-C6)	n-pentane	air	15	114.5
CH0010U	47.3776	8.53042	409	NMHC (C2-C6)	n-pentane	air	16	79
CH0010U	47.3776	8.53042	409	NMHC (C2-C6)	n-pentane	air	17	86.6668
CH0010U	47.3776	8.53042	409	NMHC (C2-C6)	n-pentane	air	18	111.75
CH0010U	47.3776	8.53042	409	NMHC (C2-C6)	n-pentane	air	19	192.75
CH0010U	47.3776	8.53042	409	NMHC (C2-C6)	pentenes	air	12	70.75
CH0010U	47.3776	8.53042	409	NMHC (C2-C6)	pentenes	air	13	56.9583
CH0010U	47.3776	8.53042	409	NMHC (C2-C6)	pentenes	air	14	114.75
CH0010U	47.3776	8.53042	409	NMHC (C2-C6)	pentenes	air	15	61.5
CH0010U	47.3776	8.53042	409	NMHC (C2-C6)	pentenes	air	16	40.25
CH0010U	47.3776	8.53042	409	NMHC (C2-C6)	pentenes	air	17	32.5001
CH0010U	47.3776	8.53042	409	NMHC (C2-C6)	pentenes	air	18	70.5
CH0010U	47.3776	8.53042	409	NMHC (C2-C6)	pentenes	air	19	85.25
CH0010U	47.3776	8.53042	409	NMHC (C2-C6)	propane	air	12	376.5
CH0010U	47.3776	8.53042	409	NMHC (C2-C6)	propane	air	13	1006.46
CH0010U	47.3776	8.53042	409	NMHC (C2-C6)	propane	air	14	800.75
CH0010U	47.3776	8.53042	409	NMHC (C2-C6)	propane	air	15	609.75
CH0010U	47.3776	8.53042	409	NMHC (C2-C6)	propane	air	16	405.25
CH0010U	47.3776	8.53042	409	NMHC (C2-C6)	propane	air	17	350.708
CH0010U	47.3776	8.53042	409	NMHC (C2-C6)	propane	air	18	450.5
CH0010U	47.3776	8.53042	409	NMHC (C2-C6)	propane	air	19	659.25
CH0010U	47.3776	8.53042	409	NMHC (C2-C6)	propene	air	12	76.25
CH0010U	47.3776	8.53042	409	NMHC (C2-C6)	propene	air	13	75.3333
CH0010U	47.3776	8.53042	409	NMHC (C2-C6)	propene	air	14	96.5
CH0010U	47.3776	8.53042	409	NMHC (C2-C6)	propene	air	15	81.5
CH0010U	47.3776	8.53042	409	NMHC (C2-C6)	propene	air	16	66.5
CH0010U	47.3776	8.53042	409	NMHC (C2-C6)	propene	air	17	61.4584
CH0010U	47.3776	8.53042	409	NMHC (C2-C6)	propene	air	18	81.75
CH0010U	47.3776	8.53042	409	NMHC (C2-C6)	propene	air	19	77.75
CH0010U	47.3776	8.53042	409	NMHC (C7-C12)	isoheptanes	air	12	57.75
CH0010U	47.3776	8.53042	409	NMHC (C7-C12)	isoheptanes	air	13	103.083
CH0010U	47.3776	8.53042	409	NMHC (C7-C12)	isoheptanes	air	14	146
CH0010U	47.3776	8.53042	409	NMHC (C7-C12)	isoheptanes	air	15	95.75
CH0010U	47.3776	8.53042	409	NMHC (C7-C12)	isoheptanes	air	16	34.75
CH0010U	47.3776	8.53042	409	NMHC (C7-C12)	isoheptanes	air	17	21.0001
CH0010U	47.3776	8.53042	409	NMHC (C7-C12)	isoheptanes	air	18	96.5
CH0010U	47.3776	8.53042	409	NMHC (C7-C12)	isoheptanes	air	19	102.5
CH0010U	47.3776	8.53042	409	NO2	nitrogen_dioxide	air	12	3.5631
CH0010U	47.3776	8.53042	409	NO2	nitrogen_dioxide	air	13	6.4904
CH0010U	47.3776	8.53042	409	NO2	nitrogen_dioxide	air	14	5.0158
CH0010U	47.3776	8.53042	409	NO2	nitrogen_dioxide	air	15	4.0101
CH0010U	47.3776	8.53042	409	NO2	nitrogen_dioxide	air	16	3.1667
CH0010U	47.3776	8.53042	409	NO2	nitrogen_dioxide	air	17	3.3031
CH0010U	47.3776	8.53042	409	NO2	nitrogen_dioxide	air	18	5.509
CH0010U	47.3776	8.53042	409	NO2	nitrogen_dioxide	air	19	6.1058
CH0010U	47.3776	8.53042	409	O3max	ozone	air	12	110.11
CH0010U	47.3776	8.53042	409	O3max	ozone	air	13	155.04
CH0010U	47.3776	8.53042	409	O3max	ozone	air	14	149.68
CH0010U	47.3776	8.53042	409	O3max	ozone	air	15	146.59
CH0010U	47.3776	8.53042	409	O3max	ozone	air	16	143.9
CH0010U	47.3776	8.53042	409	O3max	ozone	air	17	139.78
CH0010U	47.3776	8.53042	409	O3max	ozone	air	18	139.52
CH0010U	47.3776	8.53042	409	O3max	ozone	air	19	172.69
CH0053R	47.1896	8.17543	797	Aromatics	benzene	air	12	16
CH0053R	47.1896	8.17543	797	Aromatics	benzene	air	13	10.25
CH0053R	47.1896	8.17543	797	Aromatics	benzene	air	14	13.9168
CH0053R	47.1896	8.17543	797	Aromatics	benzene	air	15	29.5
CH0053R	47.1896	8.17543	797	Aromatics	benzene	air	16	24.75
CH0053R	47.1896	8.17543	797	Aromatics	benzene	air	18	24.25
CH0053R	47.1896	8.17543	797	Aromatics	benzene	air	19	24.042
CH0053R	47.1896	8.17543	797	Aromatics	ethylbenzene	air	12	8
CH0053R	47.1896	8.17543	797	Aromatics	ethylbenzene	air	13	10.5
CH0053R	47.1896	8.17543	797	Aromatics	ethylbenzene	air	14	5.29207
CH0053R	47.1896	8.17543	797	Aromatics	ethylbenzene	air	15	8
CH0053R	47.1896	8.17543	797	Aromatics	ethylbenzene	air	16	2.75
CH0053R	47.1896	8.17543	797	Aromatics	ethylbenzene	air	18	6.75
CH0053R	47.1896	8.17543	797	Aromatics	ethylbenzene	air	19	10.2499
CH0053R	47.1896	8.17543	797	Aromatics	m-p-xylene	air	12	7
CH0053R	47.1896	8.17543	797	Aromatics	m-p-xylene	air	13	11.5
CH0053R	47.1896	8.17543	797	Aromatics	m-p-xylene	air	14	11.0843
CH0053R	47.1896	8.17543	797	Aromatics	m-p-xylene	air	15	9
[truncated: 17,221 more rows]

## Sheet: DOIs
Code	Site	lat	long	alt	Component group	DOIs
AT0002R	Illmitz	47.7667	16.7667	117.0 m	EC	https://doi.org/10.48597/U9VH-VBVC
AT0002R					Nitrogen dioxide	https://doi.org/10.48597/E7JK-TVU6
AT0002R					OC	https://doi.org/10.48597/ATAX-JE7E
AT0002R					Ozone	https://doi.org/10.48597/CEB9-ZX26
AT0002R					PM25 mass	https://doi.org/10.48597/8G39-V3EM
AT0002R					Tracers	https://doi.org/10.48597/ZDZ8-4G22
AT0002R					VOC (NMHCs etc from canister)	https://doi.org/10.48597/YHB4-ERMZ
AT0002R					VOC (OVOCs, DNPH)	https://doi.org/10.48597/TWQX-7SW3
AT0002R					VOC (terpenes etc, from tenax tubes)	https://doi.org/10.48597/E4EF-2MNM
BE0007R	TMNT09 Vielsalm	50.304	6.00127	496.0 m	Nitrogen oxides	https://doi.org/10.48597/MNVP-EPZH
BE0007R					OC/EC	https://doi.org/10.48597/FCYU-75Z7
BE0007R					Ozone	https://doi.org/10.48597/2CP4-RH65
BE0007R					Particle number size distribution	https://doi.org/10.48597/AG4W-ZCAH
BE0007R					Tracers	https://doi.org/10.48597/HZQA-YXS9
BE0007R					VOC (NMHCs etc from canister)	https://doi.org/10.48597/CE4S-BHR9
BE0007R					VOC (OVOCs, DNPH)	https://doi.org/10.48597/8CBV-WN4S
BE0007R					VOC (PTR-MS)	https://doi.org/10.48597/2KRG-GQBH
BE0007R					VOC (terpenes etc, from tenax tubes)	https://doi.org/10.48597/EDTG-A76G
CH0010U	Zürich-Kaserne	47.3776	8.53042	409.0 m	Nitrogen oxides	https://doi.org/10.48597/9R3J-EW97
CH0010U					Ozone	https://doi.org/10.48597/4Y2N-F6TB
CH0010U					VOC (GC-GC/FID)	https://doi.org/10.48597/UYW4-RZPY
CH0053R	Beromünster	47.1896	8.17543	797.0 m	Nitrogen dioxide	https://doi.org/10.48597/UTR3-KUZW
CH0053R					Ozone	https://doi.org/10.48597/3D4W-33PK
CH0053R					VOC (GC-GC/FID)	https://doi.org/10.48597/9M6N-7GJZ
CY0002R	Agia Marina Xyliatou / Cyprus Atmospheric Observatory	35.0381	33.0578	520.0 m	Nitrogen dioxide	https://doi.org/10.48597/86S6-B5AK
CY0002R					Ozone	https://doi.org/10.48597/P43Y-5XVC
CY0002R					VOC (PTR-MS)	https://doi.org/10.48597/9BA3-3RF3
CZ0003R	Kosetice (NAOK)	49.5734	15.0803	535.0 m	OC/EC	https://doi.org/10.48597/B9WZ-KFUD
CZ0003R					Ozone	https://doi.org/10.48597/UVPV-UW74
CZ0003R					Particle number size distribution	https://doi.org/10.48597/BMR6-99VW
CZ0003R					PM25 mass	https://doi.org/10.48597/D4KY-ZB8Y
CZ0003R					Tracers	https://doi.org/10.48597/ZGAN-CESP
CZ0003R					VOC (hydrocarbons)	https://doi.org/10.48597/EKZZ-38DW
CZ0003R					VOC (OVOCs, DNPH)	https://doi.org/10.48597/MREE-TK2Q
CZ0003R					VOC (terpenes etc, from tenax tubes)	https://doi.org/10.48597/KRWJ-4Z79
DE0007R	Neuglobsow	53.1413	13.0317	62.0 m	Nitrogen dioxide	https://doi.org/10.48597/J6SB-76JM
DE0007R					OC/EC	https://doi.org/10.48597/2SUF-A9MU
DE0007R					Ozone	https://doi.org/10.48597/SU4P-UBC7
DE0007R					Particle number size distribution	https://doi.org/10.48597/8V8H-2DM2
DE0007R					PM25 mass	https://doi.org/10.48597/WVW5-3DBY
DE0007R					Tracers	https://doi.org/10.48597/MCCK-4G3Z
DE0007R					VOC (NMHCs, cansitster)	https://doi.org/10.48597/CPQK-94GG
DE0007R					VOC (OVOCs, DNPH)	https://doi.org/10.48597/8249-V8HV
DE0007R					VOC (terpenes etc, from tenax tubes)	https://doi.org/10.48597/VNC2-Q8RZ
DE0008R	Schmücke	50.65	10.7667	937.0 m	Nitrogen oxides	https://doi.org/10.48597/BUBM-2BVG
DE0008R					OC/EC	https://doi.org/10.48597/GZ6G-SNAQ
DE0008R					Ozone	https://doi.org/10.48597/2VRA-K859
DE0008R					PM25 mass	https://doi.org/10.48597/XTWS-RBDA
DE0008R					Tracers	https://doi.org/10.48597/M4DR-WD6C
DE0008R					VOC (NMHCs, canister)	https://doi.org/10.48597/6JSG-7STY
DE0008R					VOC (OVOCs, DNPH)	https://doi.org/10.48597/6BY6-FC7W
DE0008R					VOC (terpenes etc, from tenax tubes)	https://doi.org/10.48597/MMCG-FH95
DE0043G	Hohenpeissenberg	47.8015	11.0096	975.0 m	Nitrogen oxides	https://doi.org/10.48597/ME5E-SCF6
DE0043G					Ozone	https://doi.org/10.48597/SH5Q-GA2K
DE0043G					Particle number size distribution	https://doi.org/10.48597/YW4C-V3R9
DE0043G					VOC (NMHCs, GC/FID)	https://doi.org/10.48597/SMBT-64VA
DE0044R	Melpitz	51.5255	12.9277	86.0 m	OC/EC	https://doi.org/10.48597/Q74C-ATG9
DE0044R					Particle number size distribution	https://doi.org/10.48597/4KY8-43JX
DE0044R					PM10 mass	https://doi.org/10.48597/XU57-GZNW
DE0044R					Tracers	https://doi.org/10.48597/CQ8Q-HY5Z
DE0044R					VOC (NMHCs etc from canister)	https://doi.org/10.48597/583H-AMDJ
DE0044R					VOC (terpenes etc, from tenax tubes)	https://doi.org/10.48597/6RM5-7FFZ
ES0019U	Barcelona (Palau Reial)	41.3875	2.11532	80.0 m	Nitrogen dioxide	https://doi.org/10.48597/UZYA-NXRG
ES0019U					OC/EC	https://doi.org/10.48597/63Z5-MPRR
ES0019U					Ozone	https://doi.org/10.48597/N7N2-CQRT
ES0019U					PM mass	https://doi.org/10.48597/ME7F-BDBU
ES0019U					Tracers	https://doi.org/10.48597/8BWB-3Q5Z
ES0019U					VOC (PTR-MS)	https://doi.org/10.48597/ATJR-GJBJ
ES0021U	Madrid (CIEMAT)	40.4564	-3.72563	669.0 m	Nitrogen oxides and ozone	https://doi.org/10.48597/39A7-RGGZ
ES0021U					OC/EC	https://doi.org/10.48597/G3W5-MNZ5
ES0021U					Particle number size distribution	https://doi.org/10.48597/N5X5-2R8F
ES0021U					Tracers	https://doi.org/10.48597/J29S-YY5U
ES0021U					VOC (NMHCs etc from canister)	https://doi.org/10.48597/66YE-ERHN
ES0021U					VOC (OVOCs, DNPH)	https://doi.org/10.48597/3M6J-MNEA
ES0021U					VOC (terpenes etc, from tenax tubes)	https://doi.org/10.48597/UY9R-PHUW
ES0026U	Bilbao, María Díaz de Haro	43.2652	-2.9475	911.0 m	VOC (NMHC, GC/FID)	https://doi.org/10.48597/7D8G-G3T5
ES1778R	Montseny	41.7667	2.35	700.0 m	Nitrogen oxides	https://doi.org/10.48597/76PA-W9GZ
ES1778R					OC/EC	https://doi.org/10.48597/VE52-AUTK
ES1778R					Ozone	https://doi.org/10.48597/9TDE-69C8
ES1778R					Particle number size distribution	https://doi.org/10.48597/VKS6-7KCS
ES1778R					PM mass	https://doi.org/10.48597/QUHE-32XQ
ES1778R					Tracers	https://doi.org/10.48597/YFTY-UUAA
ES1778R					VOC (PTR-MS)	https://doi.org/10.48597/H3VP-EMXE
FI0050R	Hyytiälä	61.85	24.2833	181.0 m	Nitrogen oxides	https://doi.org/10.48597/2KWK-2NJJ
FI0050R					Ozone	https://doi.org/10.48597/QZYH-QPVF
FI0050R					Particle number size distribution	https://doi.org/10.48597/MJ36-5GWW
FI0050R					VOC (PTR-MS)	https://doi.org/10.48597/5V2R-2DWQ
FI0050R					VOC (PTR-MS)	https://doi.org/10.48597/8H8V-8HXX
FR0008R	Donon	48.5	7.13333	775.0 m	Nitrogen dioxide	https://doi.org/10.48597/6PF3-NFCT
FR0008R					OC/EC	https://doi.org/10.48597/2CV5-5JND
FR0008R					Ozone	https://doi.org/10.48597/65NH-E75G
FR0008R					PM mass	https://doi.org/10.48597/T2J8-JPBN
FR0008R					Tracers	https://doi.org/10.48597/YVM9-9X9W
FR0008R					VOC (NMHCs etc from canister)	https://doi.org/10.48597/QBW2-6QQA
FR0008R					VOC (OVOCs, DNPH)	https://doi.org/10.48597/3VJH-NKJB
FR0008R					VOC (terpenes etc, from tenax tubes)	https://doi.org/10.48597/X63H-ZA8R
FR0013R	Peyrusse Vieille	43.6167	0.183333	200.0 m	Nitrogen dioxide	https://doi.org/10.48597/QWTG-Z4QA
FR0013R					OC/EC	https://doi.org/10.48597/Z3SA-SGWK
FR0013R					Ozone	https://doi.org/10.48597/KUYK-4SVQ
FR0013R					PM mass	https://doi.org/10.48597/9KVN-EC74
FR0013R					Tracers	https://doi.org/10.48597/D7E6-2CK6
FR0013R					VOC (terpenes etc, from tenax tubes)	https://doi.org/10.48597/T9T3-CYVB
FR0013R					VOCs (NMHC etc from GC/FID)	https://doi.org/10.48597/SYEV-3WSV
FR0018R	La Coulonche	48.6333	-0.45	309.0 m	Nitrogen dioxide	https://doi.org/10.48597/PNWH-MM48
FR0018R					OC/EC	https://doi.org/10.48597/FFQ5-CFY7
FR0018R					Ozone	https://doi.org/10.48597/44S5-S3HN
FR0018R					PM mass	https://doi.org/10.48597/A62E-HEP5
FR0018R					Tracers	https://doi.org/10.48597/Y97V-28GC
FR0018R					VOC (NMHCs etc from canister)	https://doi.org/10.48597/YKHZ-7EKV
FR0018R					VOC (OVOCs, DNPH)	https://doi.org/10.48597/C7PW-T9N6
FR0018R					VOC (terpenes etc, from tenax tubes)	https://doi.org/10.48597/P7SK-MCKN
FR0020R	SIRTA Atmospheric Research Observatory	48.7089	2.1487	162.0 m	Nitrogen oxides	https://doi.org/10.48597/9K6S-D6A9
FR0020R					OC/EC	https://doi.org/10.48597/KSKN-5TG3
FR0020R					Ozone	https://doi.org/10.48597/V6FM-BGGH
FR0020R					Tracers	https://doi.org/10.48597/2K2E-7ECG
FR0020R					VOC (PTR-MS)	https://doi.org/10.48597/24B4-KTUD
FR0020R					VOCs (NMHC, GC/FID)	https://doi.org/10.48597/469C-866D
FR0022R	Observatoire Perenne de l'Environnement	48.5622	5.50556	392.0 m	OC/EC	https://doi.org/10.48597/F46H-ADQ8
FR0022R					Tracers	https://doi.org/10.48597/BEWC-C747
FR0027U	Villeneuve d'Ascq	50.611	3.14035	70.0 m	Nitrogen dioxide	https://doi.org/10.48597/BK6B-QZ2J
FR0027U					Ozone	https://doi.org/10.48597/B3Q9-7UCP
FR0027U					Particle number size distribution	https://doi.org/10.48597/ZBFC-CVUW
FR0027U					VOC (NMHCs etc from canister)	https://doi.org/10.48597/HNQW-X3ZM
FR0027U					VOC (OVOCs, DNPH)	https://doi.org/10.48597/6YJU-GVNG
FR0027U					VOC (terpenes etc, from tenax tubes)	https://doi.org/10.48597/9FYY-S7R7
FR0030R	Puy de Dôme	45.7722	2.96489	1465.0 m	OC/EC	https://doi.org/10.48597/H73V-87BH
FR0030R					Ozone	https://doi.org/10.48597/GQRT-3YES
FR0030R					Tracers	https://doi.org/10.48597/2UYR-N6WD
FR0030R					VOC (OVOCs, DNPH)	https://doi.org/10.48597/NBSG-KH2M
FR0035U	Marseille Longchamp	43.3053	5.39472	73.0 m	OC/EC	https://doi.org/10.48597/4NKU-VYSA
FR0035U					PM10 mass	https://doi.org/10.48597/8CZ5-UTVE
FR0035U					Tracers	https://doi.org/10.48597/7PRP-BWCZ
FR0038U	Grenoble Frenes	45.1619	5.7356	214.0 m	OC/EC	https://doi.org/10.48597/DTRE-V6VN
FR0038U					PM10 mass	https://doi.org/10.48597/MA97-N98K
FR0038U					Tracers	https://doi.org/10.48597/C5RE-Y67Z
FR0041U	Paris Chatelet	48.8621	2.34462	35.0 m	OC/EC	https://doi.org/10.48597/WD5V-VDBS
FR0041U					Tracers	https://doi.org/10.48597/V3Q2-BDZY
GB0048R	Auchencorth Moss	55.7922	-3.2429	260.0 m	Nitrogen dioxide	https://doi.org/10.48597/QXFA-9PJA
GB0048R					OC/EC	https://doi.org/10.48597/WEXF-XEU4
GB0048R					Ozone	https://doi.org/10.48597/QMMG-5GC6
GB0048R					PM25 mass	https://doi.org/10.48597/D73X-VZS4
GB0048R					Tracers	https://doi.org/10.48597/DVSE-P5YP
GB0048R					VOC (Isoprene, GC/FID)	https://doi.org/10.48597/73MM-YU64
GB0048R					VOC (NMHC, GC/FID)	https://doi.org/10.48597/FB2E-U36H
GB0048R					VOC (OVOCs, DNPH)	https://doi.org/10.48597/JECZ-BN45
GB0048R					VOC (terpenes etc, from tenax tubes)	https://doi.org/10.48597/WUBE-7263
GB1055R	Chilbolton Observatory	51.1496	-1.43823	78.0 m	Nitrogen oxides	https://doi.org/10.48597/Y6JH-RYWQ
GB1055R					OC/EC	https://doi.org/10.48597/5DPY-9EBB
GB1055R					Ozone	https://doi.org/10.48597/7NWT-EK9G
GB1055R					PM25 mass	https://doi.org/10.48597/QXPX-E5VA
GB1055R					Tracers	https://doi.org/10.48597/59GV-Q4ZM
GB1055R					VOC (Isoprene, GC/FID)	https://doi.org/10.48597/6MHG-RNKU
GB1055R					VOC (NMHCs, GC/FID)	https://doi.org/10.48597/XE5Z-FFTJ
GB1055R					VOC (OVOCs, DNPH)	https://doi.org/10.48597/2B3C-VY4M
GB1055R					VOC (terpenes etc, from tenax tubes)	https://doi.org/10.48597/K3F4-QGMW
IE0031R	Mace Head	53.3258	-9.89944	5.0 m	Ozone	https://doi.org/10.48597/X7E7-QAZQ
IE0031R					VOC (NMHCs etc from canister)	https://doi.org/10.48597/Y6XD-XD7F
IE0031R					VOC (OVOCs, DNPH)	https://doi.org/10.48597/H86K-7MKB
IE0031R					VOC (terpenes etc, from tenax tubes)	https://doi.org/10.48597/U2TH-XND6
IT0004R	Ispra	45.8146	8.63572	209.0 m	Nitrogen dioxide	https://doi.org/10.48597/5WWF-Y3MG
IT0004R					OC/EC	https://doi.org/10.48597/2AMH-2RRP
IT0004R					Ozone	https://doi.org/10.48597/PXCB-58V4
IT0004R					Particle number size distribution	https://doi.org/10.48597/V28H-5CTC
IT0004R					PM25 mass	https://doi.org/10.48597/9KA9-VBBU
IT0004R					Tracers	https://doi.org/10.48597/A2MC-KHE8
IT0004R					VOC (NMHCs, GC/FID)	https://doi.org/10.48597/GY58-43CF
IT0004R					VOC (OVOCs, DNPH)	https://doi.org/10.48597/88CU-K56H
IT0004R					VOC (terpenes etc, from tenax tubes)	https://doi.org/10.48597/8H8S-9MWX
IT0009R	Monte Cimone	44.1932	10.7014	2165.0 m	Nitrogen oxides	https://doi.org/10.48597/XCVP-A5BH
IT0009R					Ozone	https://doi.org/10.48597/RZNG-7XM3
IT0009R					Tracers	https://doi.org/10.48597/CH6N-YTJJ
IT0009R					VOC (hydrocarbons)	https://doi.org/10.48597/TWZX-TMVF
IT0009R					VOC (OVOCs, DNPH)	https://doi.org/10.48597/AHZ9-RAVQ
IT0009R					VOC (terpenes etc, from tenax tubes)	https://doi.org/10.48597/G7MQ-F89T
NO0002R	Birkenes II	58.3885	8.252	219.0 m	Nitrogen dioxide	https://doi.org/10.48597/3AM6-EYTS
NO0002R					OC/EC	https://doi.org/10.48597/Q8UX-URAZ
NO0002R					Ozone	https://doi.org/10.48597/SU2S-3VZX
NO0002R					Particle number size distribution	https://doi.org/10.48597/55XV-K3VB
NO0002R					PM10 mass	https://doi.org/10.48597/JJMZ-UABF
NO0002R					Tracers	https://doi.org/10.48597/986R-M39Z
NO0002R					VOC (NMHCs etc from canister Jülich)	https://doi.org/10.48597/WHK3-AAHH
NO0002R					VOC (OVOCs, DNPH)	https://doi.org/10.48597/FXRD-4GBN
NO0002R					VOC (terpenes etc, from tenax tubes)	https://doi.org/10.48597/BSC6-ECDY
