# Supplementary material for: Spatial variability of VOCs, ozone, and carbonaceous aerosols during the 2022 European summer heatwave
Source: Copernicus journal article supplement (doi:10.5194/egusphere-2025-6166), 2025-12-30
Supplement: Supplementary file 1 [file Supplementary_IMP.2022.pdf › Supplementary_IMP.2022.pdf]

1 **Supplementary Information: Spatial variability of VOCs, ozone, and**  
2 **carbonaceous aerosols during the 2022 European summer heatwave**

3 Wenche Aas et al

4  
5 **Table S1 Sites participating in the intensive measurement campaign (IMP) from 12 to 29 July, 2022.**

| <b>code</b> | <b>Name</b>                | <b>latitude</b> | <b>longitude</b> | <b>altitude</b> | <b>Landuse</b>         |
|-------------|----------------------------|-----------------|------------------|-----------------|------------------------|
| AT0002R     | Illmitz                    | 47.7667         | 16.7667          | 117.0 m         | Grassland              |
| BE0007R     | TMNT09 Vielsalm            | 50.3040         | 6.0013           | 496.0 m         | Forest                 |
| CH0010U     | Zürich-Kaserne             | 47.3776         | 8.5304           | 409.0 m         | Urban, residential     |
| CH0053R     | Beromünster                | 47.1896         | 8.1754           | 797.0 m         | Agricultural           |
| CY0002R     | Agia Marina Xyliatou (CAO) | 35.0381         | 33.0578          | 520.0 m         | Agricultural           |
| CZ0003R     | Kosetice (NAOK)            | 49.5734         | 15.0803          | 535.0 m         | Agricultural           |
| DE0007R     | Neuglobsow                 | 53.1413         | 13.0317          | 62.0 m          | Forest, park           |
| DE0008R     | Schmücke                   | 50.6500         | 10.7667          | 937.0 m         | Forest                 |
| DE0043G     | Hohenpeißenberg            | 47.8015         | 11.0096          | 975.0 m         | Grassland              |
| DE0044R     | Melpitz                    | 51.5255         | 12.9277          | 86.0 m          | Agricultural           |
| ES0019U     | Barcelona (Palau Reial)    | 41.3875         | 2.1153           | 80.0 m          | Urban park             |
| ES0021U     | Madrid (CIEMAT)            | 40.4564         | -3.7256          | 669.0 m         | Urban background       |
| ES0025U     | Bilbao, María Díaz de Haro | 43.2588         | -2.9456          | 911.0 m         | Urban, residential     |
| ES1778R     | Montseny                   | 41.7667         | 2.3500           | 700.0 m         | Mountain, grass/forest |
| FI0050R     | Hyytiälä                   | 61.8500         | 24.2833          | 181.0 m         | Forest                 |
| FR0008R     | Donon                      | 48.5000         | 7.1333           | 775.0 m         | Forest                 |
| FR0013R     | Peyrusse Vieille           | 43.6167         | 0.1833           | 200.0 m         | Agricultural           |
| FR0018R     | La Coulonche               | 48.6333         | -0.4500          | 309.0 m         | Agricultural, Forest   |
| FR0020R     | SIRTA ARO                  | 48.7089         | 2.1487           | 162.0 m         | Suburban, Agricultural |
| FR0022R     | Obs. Perenne de l'Environ. | 48.5622         | 5.5056           | 392.0 m         | Agricultural           |
| FR0027U     | ATOLL (Villeneuve d'Ascq)  | 50.6110         | 3.1404           | 70.0 m          | Suburban, residential  |
| FR0030R     | Puy de Dôme                | 45.7722         | 2.9649           | 1465.0 m        | Mountain, forest       |
| FR0035U     | Marseille Longchamp        | 43.3053         | 5.3947           | 73.0 m          | Urban park             |
| FR0038U     | Grenoble Frenes            | 45.1619         | 5.7356           | 214.0 m         | Urban park             |
| FR0041U     | Paris Chatelet             | 48.8621         | 2.3446           | 35.0 m          | Urban park             |
| GB0048R     | Auchencorth Moss           | 55.7922         | -3.2429          | 260.0 m         | Agricultural           |
| GB1055R     | Chilbolton Observatory     | 51.1496         | -1.4382          | 78.0 m          | Agricultural           |
| IE0031R     | Mace Head                  | 53.3258         | -9.8994          | 5.0 m           | Coastal, grassland     |
| IT0004R     | Ispira                     | 45.8146         | 8.6357           | 209.0 m         | Residential background |
| IT0009R     | Monte Cimone               | 44.1932         | 10.7014          | 2165.0 m        | Mountain, remote park  |
| NO0002R     | Birkenes II                | 58.3885         | 8.2520           | 219.0 m         | Forest                 |

6  
7

8 **Table S2 Overview of the different components measured during the intensive measurement campaign (IMP), 12 to 29 July, 2022.**

| O-VOCs                  | NMHC (C2-C6)        | Terpenes               | Tracers             | Organic_acid          |
|-------------------------|---------------------|------------------------|---------------------|-----------------------|
| 2-methylpropenal        | 2-2-dimethylbutane  | monoterpenes           | 3-MBTCA             | 2-ketobutyric_acid    |
| 2-oxopropanal           | 2-3-dimethylbutane  |                        | sum_2-methyltetrols | 3-hydroxybutyric_acid |
| 3-buten-2-one           | 2-methylbutane      | 3-carene               | adonitol            | 4-hydroxybenzoic_acid |
| butanal                 | 2-methylpentane     | alpha-pinene           | arabitol            | 4-methylphthalic_acid |
| butanone                | 2-methylpropane     | beta-pinene            | fructose            | 4-oxoheptanoic_acid   |
| ethanal                 | 3-methylpentane     | camphene               | glucose             | adipic_acid           |
| ethanedial              | ethane              | eucalyptol             | inositol            | azelaic_acid          |
| methanal                | ethene              | limonene               | lactose             | benzoic_acid          |
| propanal                | ethyne              | myrcene                | maltose             | caproic_acid          |
| propanone               | n-butane            | p-cymene               | mannitol            | cis-pinonic_acid      |
|                         | n-hexane            | sabinene               | mannose             | citraconic_acid       |
|                         | n-pentane           | terpinolene            | melezitose          | citric_acid           |
|                         | propane             |                        | rhamnose            | gluconic_acid         |
| <b>Aromatics</b>        | propene             | alpha-humulene         | sorbitol            | glutaric_acid         |
| 1-2-3-trimethylbenzene  | propyne             | beta-caryophyllene     | sucrose             | glycolic_acid         |
| 1-2-4-trimethylbenzene  | 1-3-butadiene       | beta-farnesene         | levoglucosan        | glyoxylic_acid        |
| 1-3-5-trimethylbenzene  | butenes             | iso-longifolene        |                     | lactic_acid           |
| 1-ethyl-3-methylbenzene | isohexanes          | longicyclene           |                     | maleic_acid           |
| 1-ethyl-4-methylbenzene | isoprene            |                        | <b>Inorganic</b>    | malic_acid            |
| benzene                 | pentenes            |                        | ammonium            | malonic_acid          |
| ethylbenzene            | 1-butene            |                        | calcium             | methanesulfonic_acid  |
| m-p-xylene              | 2-methylpropene     | <b>NMHC (C7-C12)</b>   | chloride            | oxalic_acid           |
| o-xylene                | cis-2-butene        | n-decane               | magnesium           | phthalic_acid         |
| styrene                 | trans-2-butene      | n-dodecane             | nitrate             | pimelic_acid          |
| toluene                 | 1-hexene            | n-nonane               | potassium           | pinic_acid            |
| trimethylbenzene        | 1-pentene           | n-octane               | sodium              | pyruvic_acid          |
|                         | 2-2-dimethylpropane | n-undecane             | sulphate_total      | sebacic_acid          |
|                         |                     | isoheptanes            | nitrogen_dioxide    | suberic_acid          |
|                         |                     | 2-2-4-trimethylpentane | ozone               | succinic_acid         |
|                         |                     | 2-3-dimethylpentane    | elemental_carbon    | tartaric_acid         |
|                         |                     | 2-methylhexane         | organic_carbon      |                       |
|                         |                     | 3-methylheptane        | pm25_mass           |                       |
|                         |                     | methyl-cyclohexane     | pm10_mass           |                       |
|                         |                     | n-heptane              |                     |                       |
|                         |                     | 2-3-4-trimethylpentane |                     |                       |
|                         |                     | 2-methylheptane        |                     |                       |
|                         |                     | 3-methylhexane         |                     |                       |

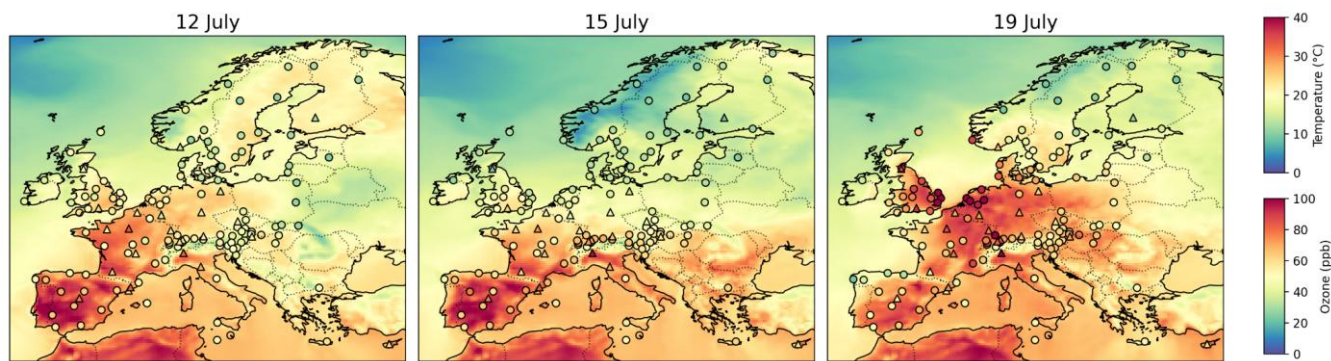

**Figure S1.** ERA5 (Hersbach et al., 2023) modelled average temperature between 12-16 UTC superimposed with observed maximum ozone concentration (marker color scale) for 12, 15 and 19 July 2022. The sites participating in the campaign are marked as triangles, and regular EMEP sites with circles, EMEP data from (Hjellbrekke and Solberg, 2024).

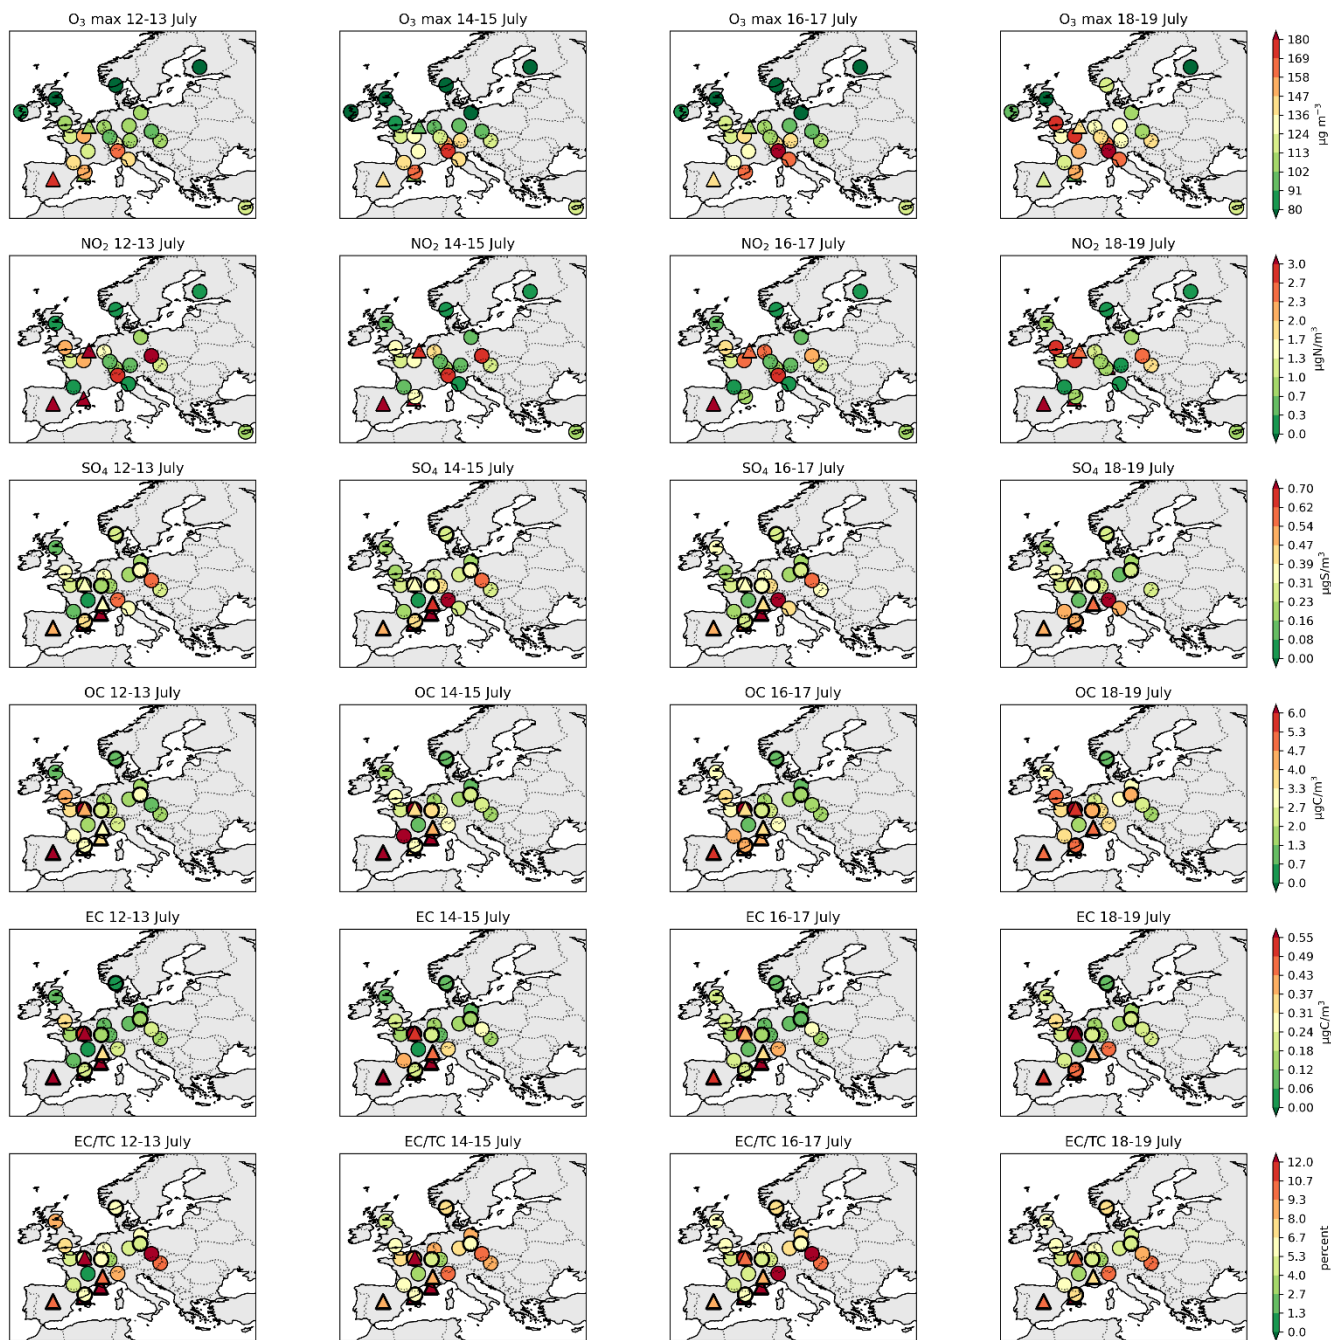

**Figure S2. Spatial and temporal variations in the maximum ozone concentration, nitrogen dioxide, sulfate and organic and elemental carbon in aerosols during 12-19 July 2022. Urban sites are denoted with a triangle. Sites with a PM<sub>10</sub> size cut-off are marked with a thicker border than those with a PM<sub>2.5</sub> cut-off.**

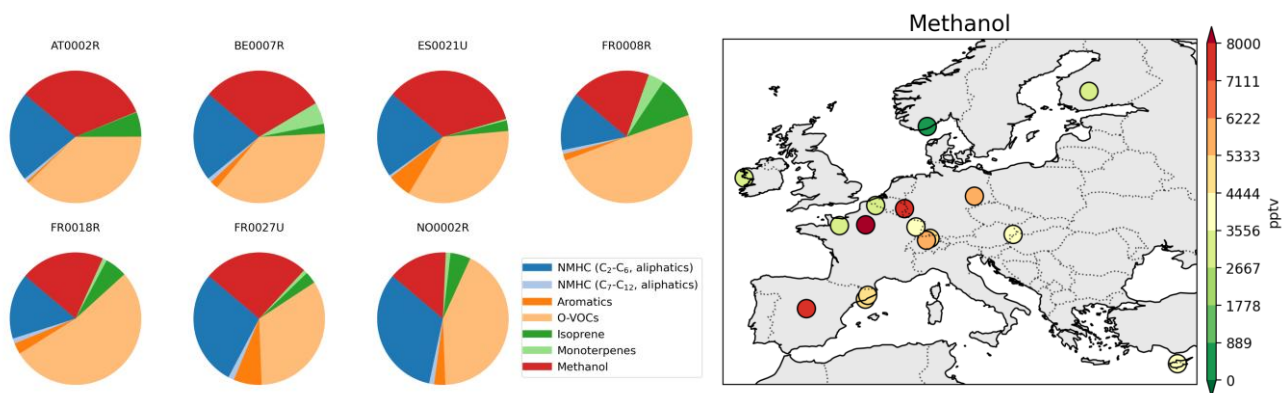

**Figure S3. Distribution of different VOC groups, including methanol (left) and spatial distribution of mid-day average concentrations (right), 12-19 July 2022 .**

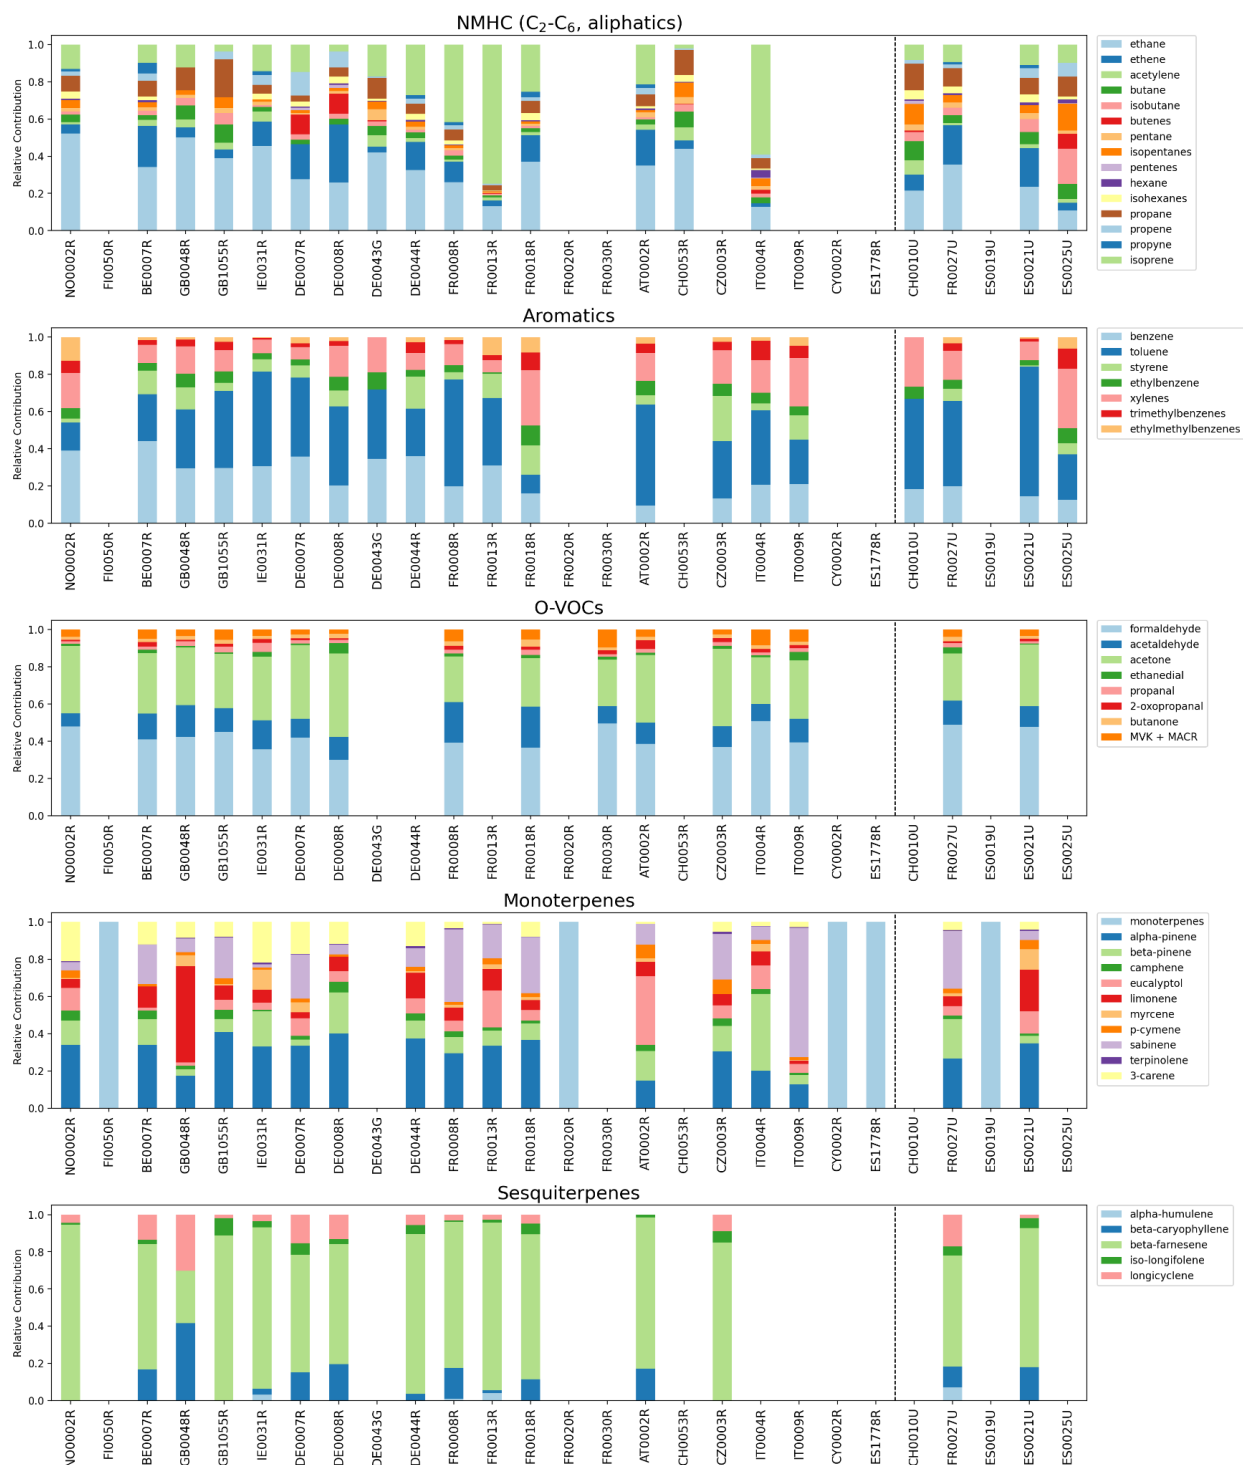

**Figure S4.** The relative chemical composition of the different VOC groups at all the sites, averaged over the measurement period (12-19 July 2022). The sites are sorted from north to south, with the urban sites separated to the right.

27

28

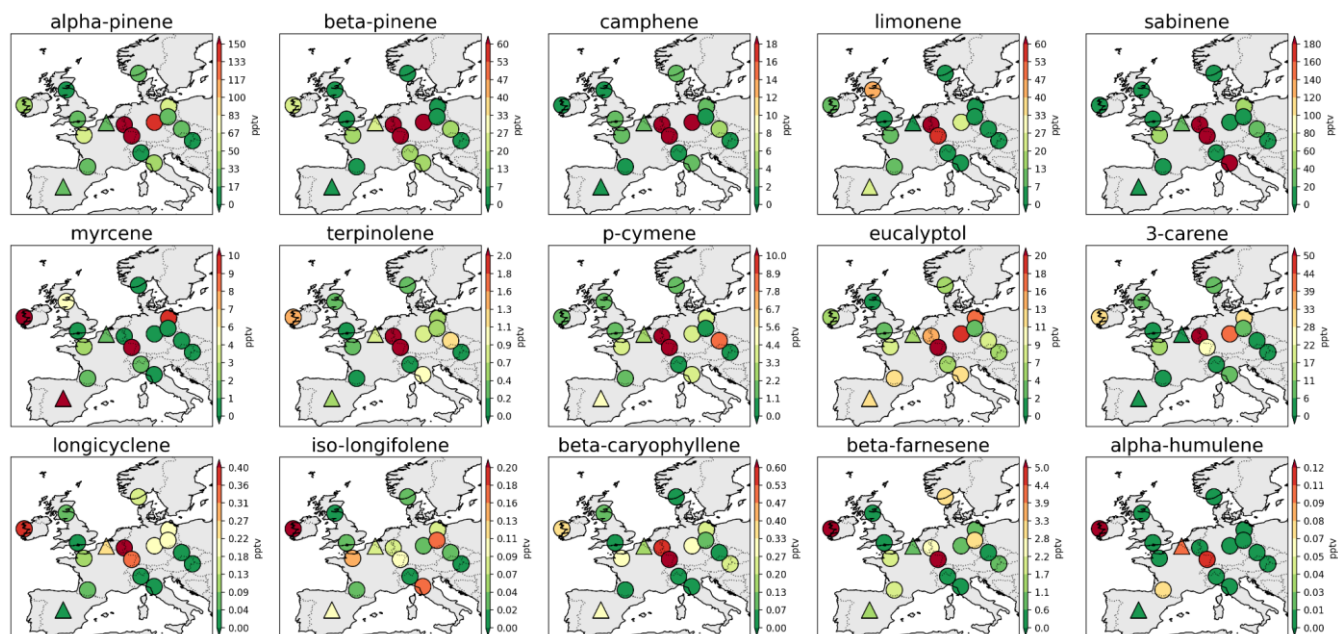

29

30

31

**Figure S5. Spatial distribution of the average concentration of the different monoterpenes and sesquiterpenes analysed over the measurement period (12-19 July 2022). Urban sites are denoted with a triangle.**

32



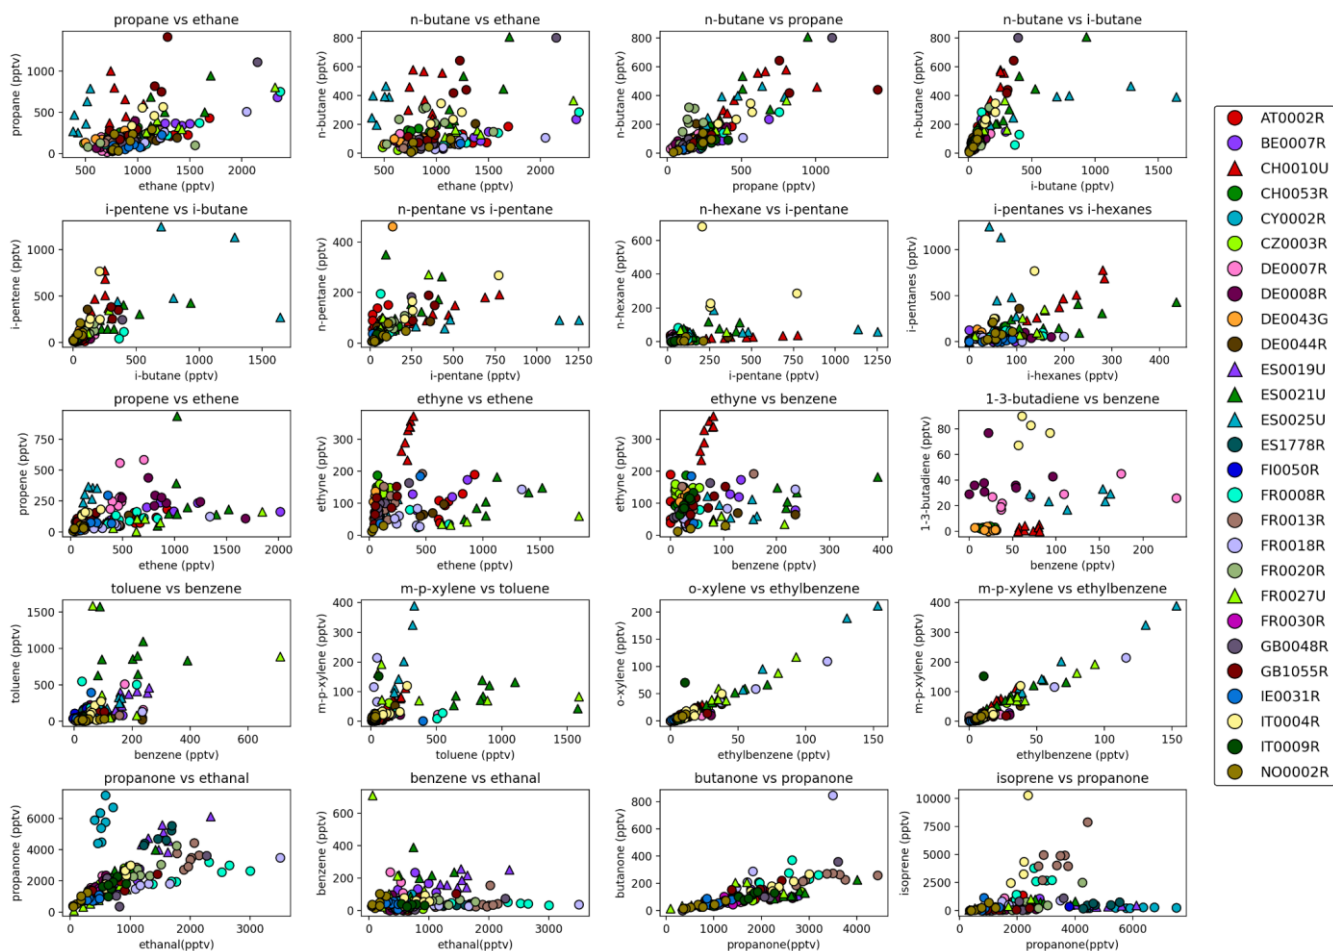

Figure S6. Scatter plots for various VOCs at the different sites. Each marker corresponds to one day during 12-19 July 2022.



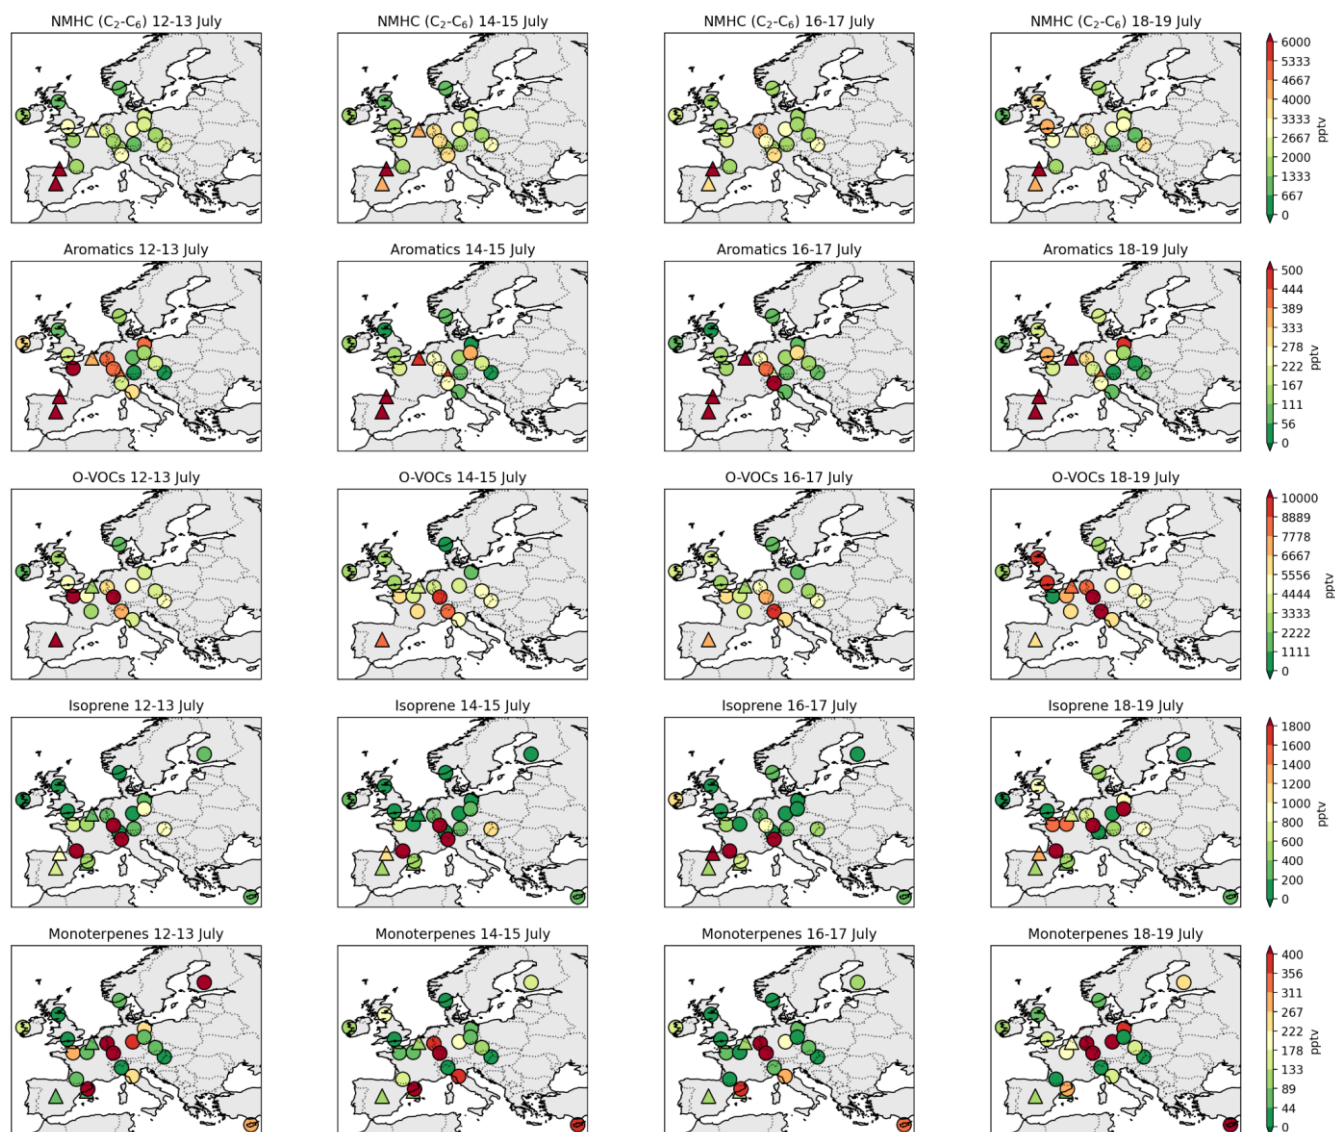

Figure S7. Temporal and spatial variations of different VOC groups. The groups sum the average concentrations for all the relevant components for 4 two-days periods from 12-19 July, 2022. Urban sites are marked with triangles. Sites with a PM<sub>10</sub> size cut-off are marked with a thicker border than those with a PM<sub>2.5</sub> cut-off.

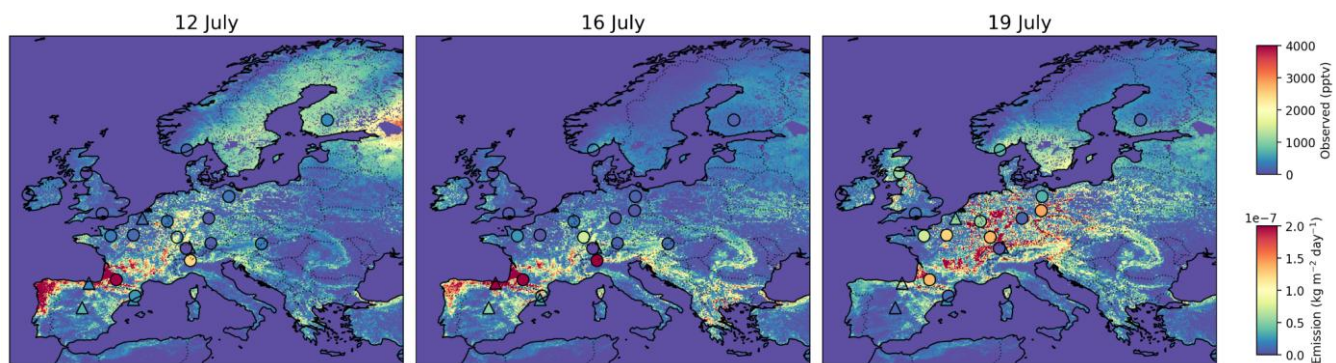

**Figure S8. Total daily isoprene emissions (from Hamer et al., 2025) superimposed with observed average isoprene concentrations between 12-16 UTC during the IMP week (12-19 July 2022).**

# Daily isoprene observations vs emissions, 12-19 July 2022

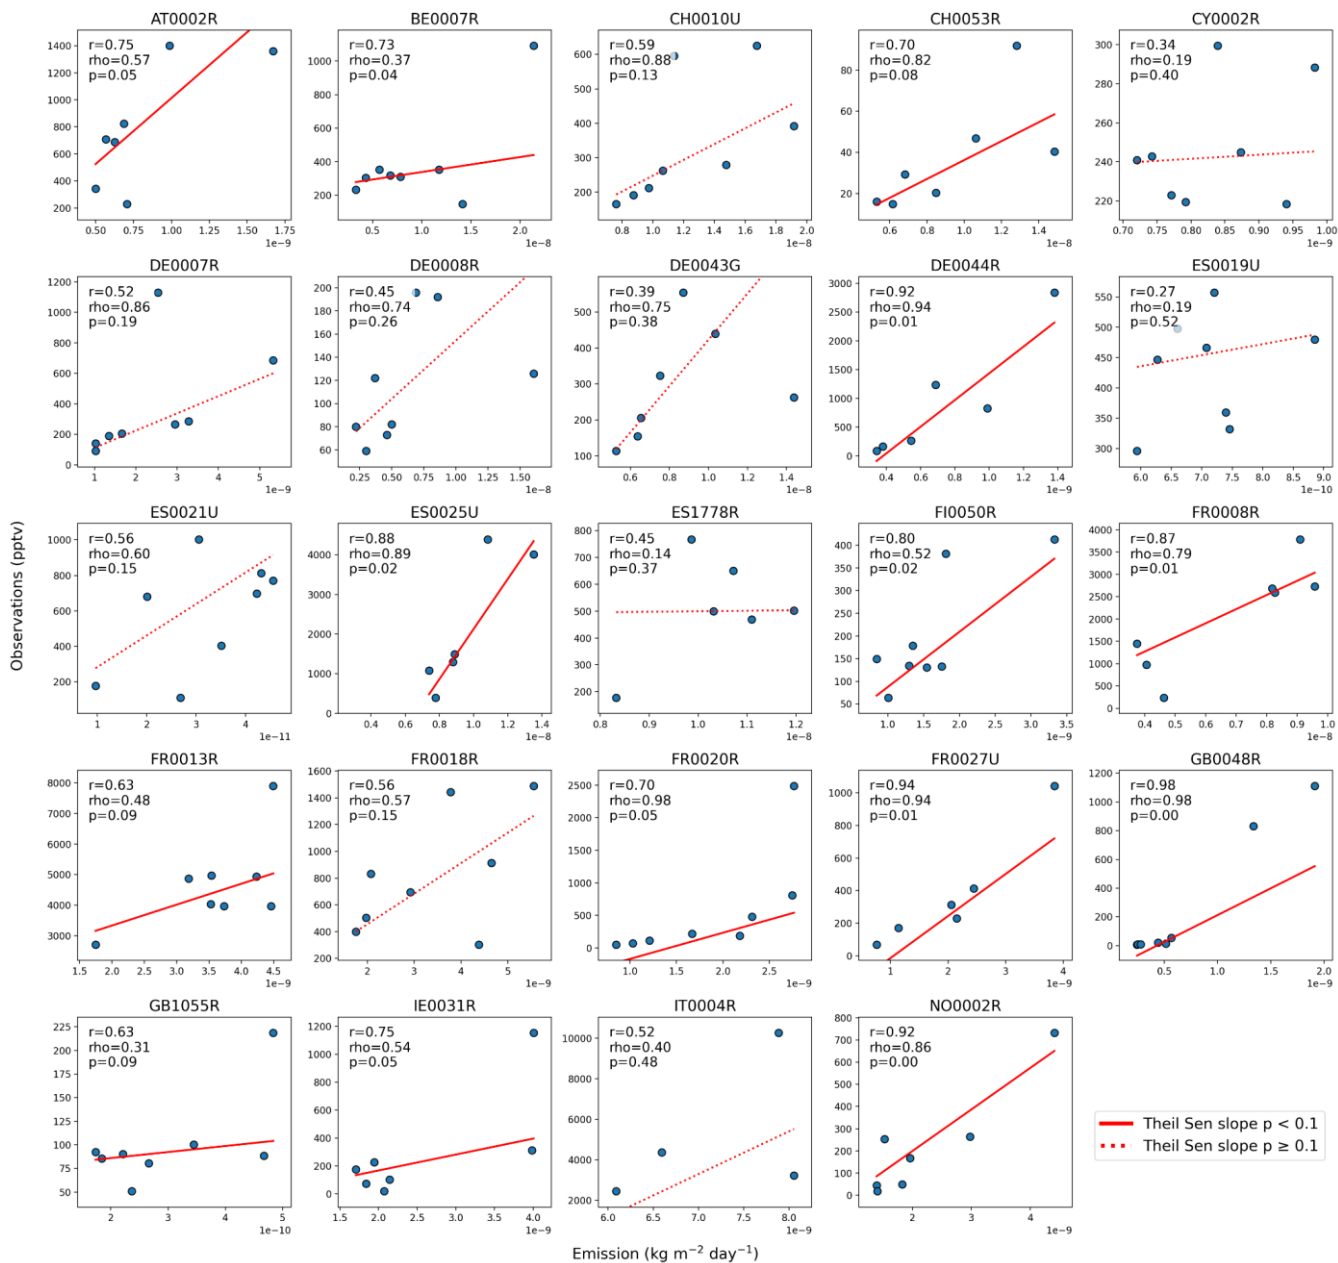

Figure S9. Total daily isoprene emissions from Hamer et al. (2025) compared with the observed average isoprene concentrations between 12-16 UTC during the IMP week (12-19 July 2022). The pearson ( $r$ ), spearman ( $\rho$ ) correlations and the  $p$ -values are given, and the Theil-Sen slopes are defined with a significant level of  $p < 0.1$  (90%).

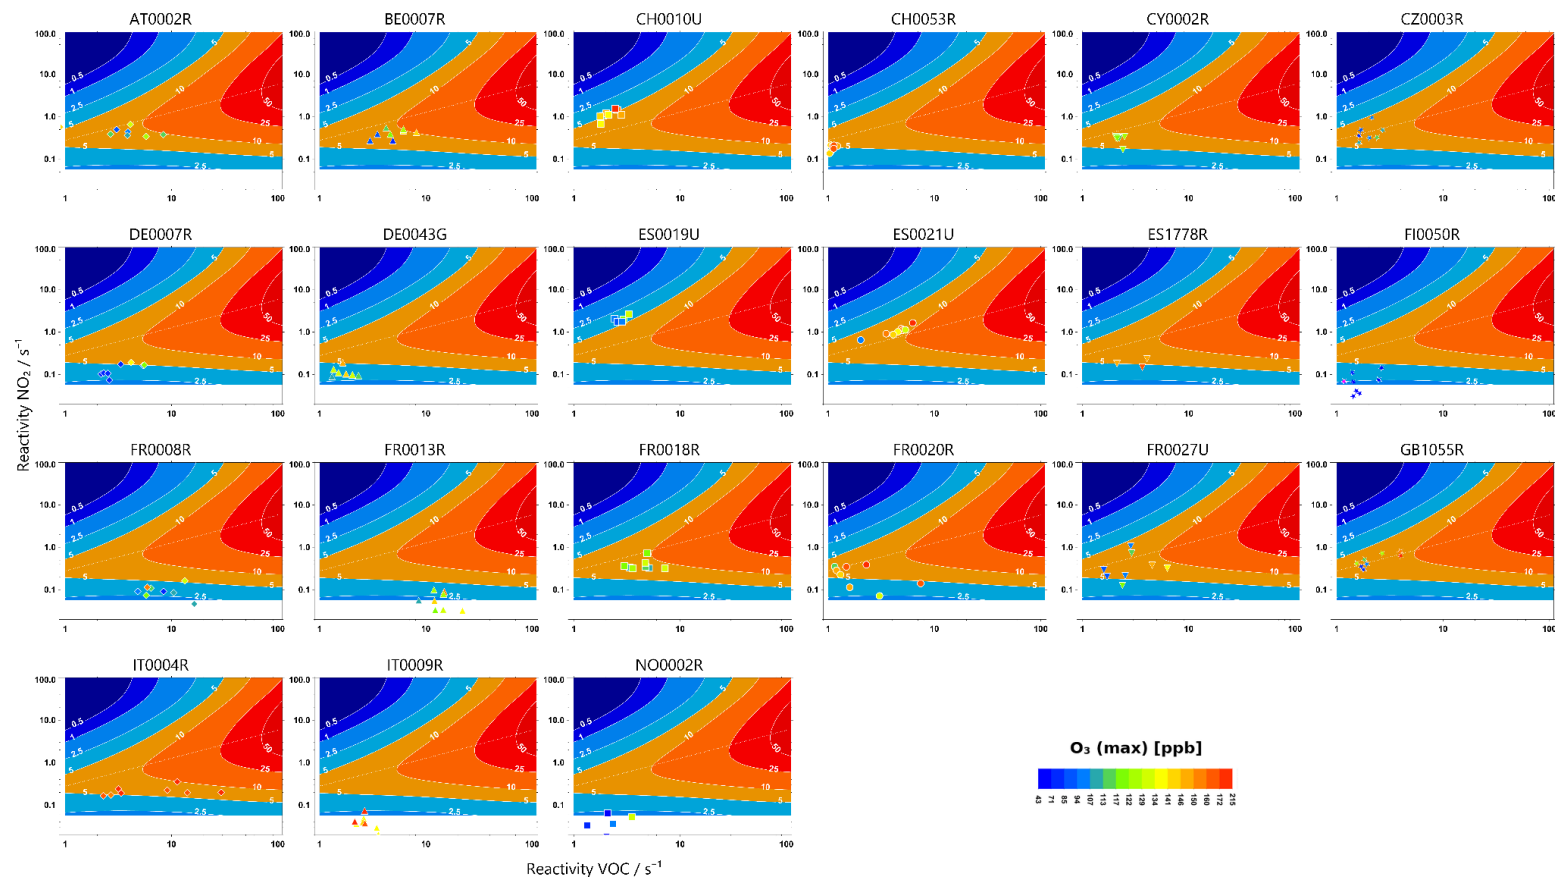

**Figure S10. Local ozone production rate (ppb /h) as a function of VOC and NO<sub>2</sub> expressed by their reactivity versus OH radicals (R VOC and R NO<sub>2</sub>) and the daily maximum ozone concentrations (ppb) marked in color code and compared to the production rate in the background isoplots based on measurements in Stuttgart in 2020 using the MCM-3.3.1 box model (Ehlers et al., 2016). The dotted line separates the VOC (above the line) and NO<sub>x</sub> (below the line) limited regimes of ozone production. At sites without CO and CH<sub>4</sub> data 0.9 s<sup>-1</sup> was added to the k<sub>OH</sub> for the VOC**

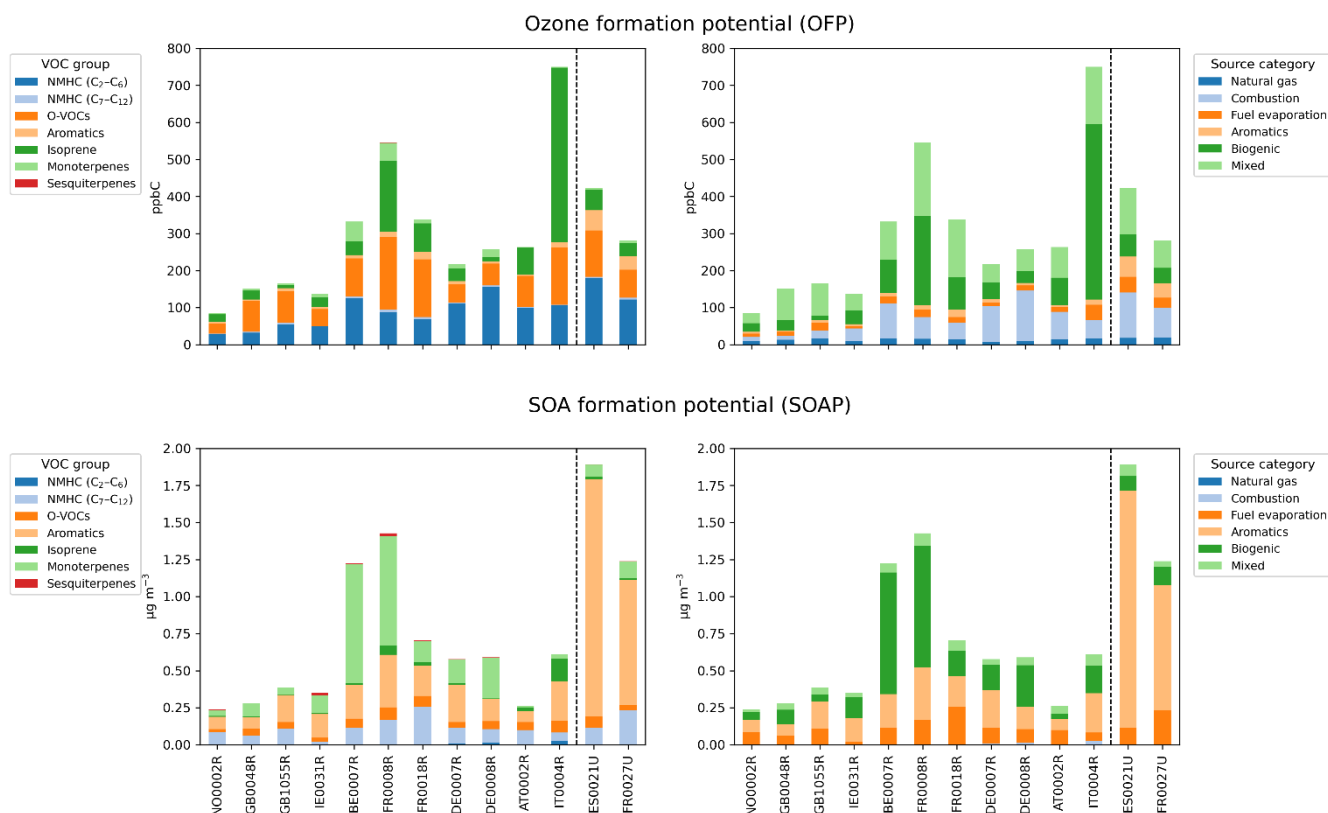

**Figure S11. The ozone and SOA formation potentials related to 1) the sum of VOCs in the different component groups (left figures), averaged over 12-16 UTC, 12-19 July 2022 and 2) to the main emission source categories, the VOCs. Natural gas includes propane and ethane. Fuel evaporation covers branched/normal alkanes in the gasoline/distillate range (C<sub>4</sub>-C<sub>12</sub>). Combustion includes unsaturated light hydrocarbons (butenes, pentenes, hexenes, 1,3-butadiene), acetylene, and propene. Aromatics are grouped together (toluene, xylenes, ethylbenzene, trimethylbenzenes, styrene, benzene) since they come from combustion, solvent use, and fuel evaporation. Biogenic includes isoprene mono- and sesquiterpenes Mixed is used for O-VOCs because they're largely secondary with multiple precursors/sources.**



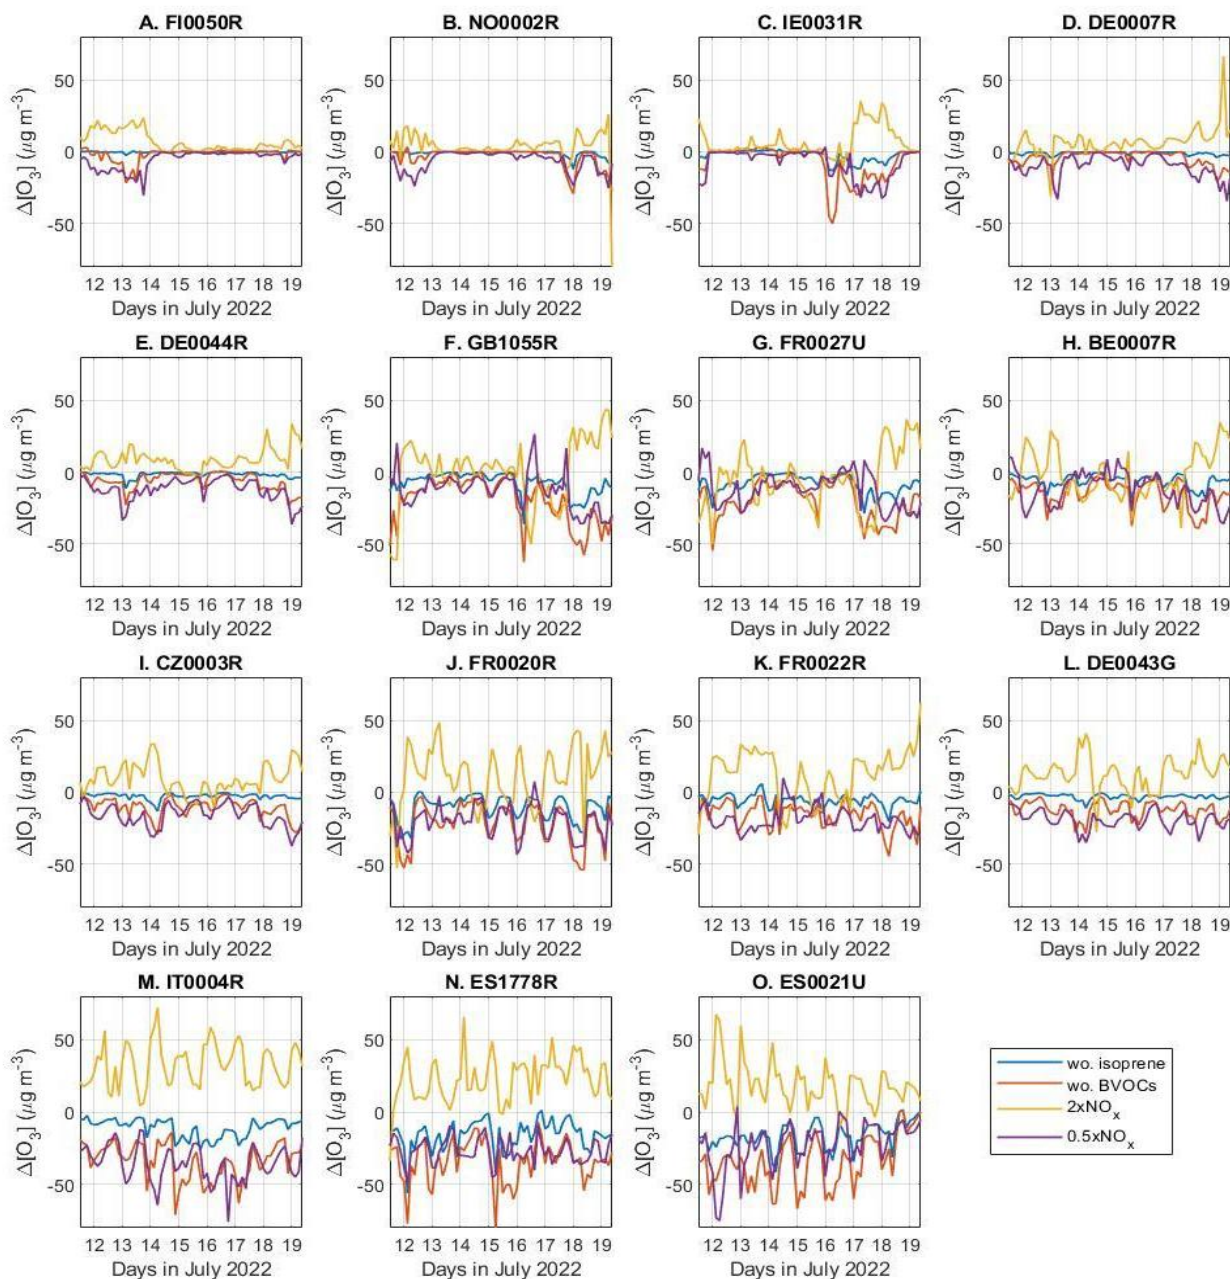

**Figure S12. Modelled changes in surface ozone concentration relative to the basecase simulations for four different model sensitivity tests: without biogenic terrestrial isoprene emissions (wo. isoprene), without terrestrial BVOC emissions (wo. BVOCs), with twice the level of anthropogenic NO<sub>x</sub> emissions (2xNO<sub>x</sub>) and with 50% lower anthropogenic NO<sub>x</sub> emissions (0.5xNO<sub>x</sub>).**

68 **Table S3. Measured and modelled ozone concentrations by the ADCHEM model during the 8-day measurement campaign from**  
69 **July 12 to July 19, 2022. r: Pearson correlation coefficients NMB: normalized mean biases, FAC2: fraction of model data points**  
70 **that are within a factor of 2 from the measured values**

| Station & case      | Measured mean<br>[O <sub>3</sub> ] (ppbv) | Modelled mean<br>[O <sub>3</sub> ] (ppbv) | NMB (%) | <i>r</i> | FAC2 |
|---------------------|-------------------------------------------|-------------------------------------------|---------|----------|------|
| <b>BE0007R</b>      |                                           |                                           |         |          |      |
| basecase            | 42.5                                      | 40.8                                      | -2.0    | 0.80     | 0.94 |
| wo. isoprene        |                                           | 37.8                                      | -9.3    | 0.81     | 0.94 |
| wo. BVOCs           |                                           | 33.4                                      | -19.7   | 0.80     | 0.92 |
| 2xNO <sub>x</sub>   |                                           | 40.2                                      | -4.5    | 0.74     | 0.92 |
| 0.5xNO <sub>x</sub> |                                           | 34.9                                      | -16.1   | 0.81     | 0.94 |
| <b>CZ0003R</b>      |                                           |                                           |         |          |      |
| basecase            | 38.8                                      | 41.2                                      | 7.7     | 0.74     | 0.97 |
| wo. isoprene        |                                           | 39.9                                      | 4.4     | 0.74     | 0.98 |
| wo. BVOCs           |                                           | 36.0                                      | -6.1    | 0.73     | 0.98 |
| 2xNO <sub>x</sub>   |                                           | 45.9                                      | 19.1    | 0.75     | 0.93 |
| 0.5xNO <sub>x</sub> |                                           | 33.3                                      | -13.1   | 0.72     | 0.98 |
| <b>DE0007R</b>      |                                           |                                           |         |          |      |
| basecase            | 32.6                                      | 29.4                                      | -5.8    | 0.60     | 0.85 |
| wo. isoprene        |                                           | 29.0                                      | -7.0    | 0.59     | 0.87 |
| wo. BVOCs           |                                           | 27.3                                      | -12.1   | 0.60     | 0.90 |
| 2xNO <sub>x</sub>   |                                           | 31.8                                      | 2.8     | 0.57     | 0.86 |
| 0.5xNO <sub>x</sub> |                                           | 25.3                                      | -21.2   | 0.62     | 0.86 |
| <b>DE0043G</b>      |                                           |                                           |         |          |      |
| basecase            | 55.4                                      | 42.8                                      | -22.1   | 0.63     | 0.94 |
| wo. isoprene        |                                           | 41.3                                      | -24.8   | 0.63     | 0.90 |
| wo. BVOCs           |                                           | 36.6                                      | -33.1   | 0.61     | 0.87 |
| 2xNO <sub>x</sub>   |                                           | 49.2                                      | -10.6   | 0.70     | 0.97 |
| 0.5xNO <sub>x</sub> |                                           | 33.1                                      | -40.1   | 0.59     | 0.77 |
| <b>DE0044R</b>      |                                           |                                           |         |          |      |
| basecase            |                                           | 34.9                                      |         |          |      |
| wo. isoprene        |                                           | 34.1                                      |         |          |      |
| wo. BVOCs           |                                           | 31.7                                      |         |          |      |
| 2xNO <sub>x</sub>   |                                           | 39.3                                      |         |          |      |
| 0.5xNO <sub>x</sub> |                                           | 29.0                                      |         |          |      |
| <b>ES0021U</b>      |                                           |                                           |         |          |      |
| basecase            | 58.2                                      | 57.4                                      | -0.8    | 0.63     | 0.88 |
| wo. isoprene        |                                           | 49.1                                      | -14.5   | 0.59     | 0.82 |
| wo. BVOCs           |                                           | 40.3                                      | -29.0   | 0.49     | 0.69 |
| 2xNO <sub>x</sub>   |                                           | 66.6                                      | 14.2    | 0.62     | 0.87 |
| 0.5xNO <sub>x</sub> |                                           | 45.9                                      | -20.1   | 0.64     | 0.79 |
| <b>ES1778R</b>      |                                           |                                           |         |          |      |
| basecase            | 61.2                                      | 58.8                                      | -4.2    | 0.42     | 0.98 |
| wo. isoprene        |                                           | 50.5                                      | -16.6   | 0.48     | 0.97 |
| wo. BVOCs           |                                           | 41.4                                      | -30.4   | 0.39     | 0.83 |
| 2xNO <sub>x</sub>   |                                           | 70.7                                      | 14.4    | 0.57     | 1.00 |
| 0.5xNO <sub>x</sub> |                                           | 45.3                                      | -25.0   | 0.32     | 0.89 |



|                                                                                                      |      |                                      |                                           |                                      |                                      |
|------------------------------------------------------------------------------------------------------|------|--------------------------------------|-------------------------------------------|--------------------------------------|--------------------------------------|
| <b>FI00050R</b><br>basecase<br>wo. isoprene<br>wo. BVOCs<br>2xNO <sub>x</sub><br>0.5xNO <sub>x</sub> | 21.8 | 18.4<br>18.4<br>17.5<br>22.0<br>15.6 | -15.9<br>-16.1<br>-19.9<br>0.6<br>-28.5   | 0.33<br>0.33<br>0.26<br>0.45<br>0.16 | 0.94<br>0.94<br>0.94<br>0.98<br>0.84 |
| <b>FR0020R</b><br>basecase<br>wo. isoprene<br>wo. BVOCs<br>2xNO <sub>x</sub><br>0.5xNO <sub>x</sub>  | 51.3 | 50.9<br>45.8<br>40.2<br>56.8<br>40.5 | -1.8<br>-10.8<br>-20.8<br>10.1<br>-20.6   | 0.62<br>0.60<br>0.54<br>0.75<br>0.55 | 0.97<br>0.98<br>0.97<br>0.90<br>0.94 |
| <b>FR0022R</b><br>basecase<br>wo. isoprene<br>wo. BVOCs<br>2xNO <sub>x</sub><br>0.5xNO <sub>x</sub>  | 49.1 | 45.8<br>43.0<br>38.2<br>52.3<br>36.2 | -5.8<br>-11.3<br>-20.5<br>7.0<br>-25.5    | 0.71<br>0.72<br>0.69<br>0.69<br>0.72 | 1.00<br>1.00<br>0.97<br>0.95<br>0.98 |
| <b>FR0027U</b><br>basecase<br>wo. isoprene<br>wo. BVOCs<br>2xNO <sub>x</sub><br>0.5xNO <sub>x</sub>  | 38.9 | 46.9<br>42.9<br>36.9<br>44.4<br>40.7 | 20.7<br>10.5<br>-4.6<br>15.2<br>4.7       | 0.68<br>0.68<br>0.67<br>0.74<br>0.67 | 0.90<br>0.90<br>0.92<br>0.90<br>0.92 |
| <b>GB1055R</b><br>basecase<br>wo. isoprene<br>wo. BVOCs<br>2xNO <sub>x</sub><br>0.5xNO <sub>x</sub>  | 38.8 | 42.5<br>38.9<br>32.6<br>43.0<br>35.9 | 9.6<br>0.2<br>-16.1<br>10.9<br>-7.4       | 0.54<br>0.53<br>0.49<br>0.72<br>0.34 | 0.88<br>0.88<br>0.89<br>0.89<br>0.86 |
| <b>IE0031R</b><br>basecase<br>wo. isoprene<br>wo. BVOCs<br>2xNO <sub>x</sub><br>0.5xNO <sub>x</sub>  | 33.7 | 26.4<br>25.3<br>22.6<br>29.3<br>22.3 | -22.2<br>-25.6<br>-33.5<br>-12.7<br>-34.2 | 0.88<br>0.89<br>0.92<br>0.90<br>0.86 | 0.61<br>0.64<br>0.63<br>0.78<br>0.55 |
| <b>IT0004R</b><br>basecase<br>wo. isoprene<br>wo. BVOCs<br>2xNO <sub>x</sub><br>0.5xNO <sub>x</sub>  | 48.0 | 76.9<br>71.4<br>60.0<br>93.3<br>59.0 | 55.1<br>44.1<br>21.6<br>86.8<br>18.9      | 0.71<br>0.70<br>0.63<br>0.74<br>0.69 | 0.57<br>0.61<br>0.69<br>0.47<br>0.67 |
| <b>NO0002R</b><br>basecase<br>wo. isoprene<br>wo. BVOCs<br>2xNO <sub>x</sub><br>0.5xNO <sub>x</sub>  | 32.1 | 26.9<br>25.5<br>25.0<br>28.6<br>23.7 | -15.0<br>-15.7<br>-20.4<br>-9.6<br>-24.7  | 0.52<br>0.50<br>0.48<br>0.44<br>0.51 | 0.75<br>0.77<br>0.77<br>0.86<br>0.71 |

71

72

73

74

**Table S4. Measured and modelled NO<sub>2</sub> concentrations during the 8-day measurement campaign from July 12 to July 19, 2022. *r*: Pearson correlation coefficients NMB: normalized mean biases, FAC2: fraction of model data points that are within a factor of 2 from the measured values**

| Station & case | Measured NO <sub>2</sub><br>(ppbv) | Modelled NO <sub>2</sub><br>(ppbv) | NMB (%) | <i>r</i> | FAC2 |
|----------------|------------------------------------|------------------------------------|---------|----------|------|
| BE0007R        | 5.32                               | 4.90                               | -7.8    | 0.19     | 0.79 |
| CZ0003R        |                                    | 2.75                               |         |          |      |
| DE0007R        | 0.96                               | 1.24                               | 21.9    | 0.89     | 0.83 |
| DE0043G        | 0.82                               | 1.87                               | 124.9   | 0.42     | 0.42 |
| DE0044R        |                                    | 2.11                               |         |          |      |
| ES0021U        | 0.40                               | 12.13                              | 2764.2  | 0.11     | 0.0  |
| ES1778R        |                                    | 2.72                               |         |          |      |
| FR0020R        |                                    | 5.31                               |         |          |      |
| FR0022R        | 1.01                               | 1.79                               | 73.6    | 0.72     | 0.67 |
| FR0027U        | 4.83                               | 6.76                               | 38.9    | 0.30     | 0.51 |
| FI00050R       | 0.46                               | 0.41                               | -11.7   | 0.78     | 0.68 |
| GB1055R        | 3.66                               | 4.64                               | 22.4    | 0.37     | 0.67 |
| IE0031R        |                                    | 0.41                               |         |          |      |
| IT0004R        | 4.55 <sup>a</sup>                  | 4.99                               | 27.7    | -0.24    | 0.71 |
| NO0002R        | 0.24                               | 0.36                               |         |          |      |

75

<sup>a</sup>The measurement data coverage was only 22%.

76

77

**Table S5. Measured and modelled OC during the 8-day measurement campaign from July 12 to July 19, 2022.**

| Station & case                                                                                      | Measured OC<br>in PM <sub>2.5</sub> (µgC m <sup>-3</sup> ) | Measured OC<br>in PM <sub>10</sub> (µgC m <sup>-3</sup> ) | Modelled OC<br>in PM <sub>2.5</sub> (µgC m <sup>-3</sup> ) | Modelled OC<br>in PM <sub>10</sub> (µgC m <sup>-3</sup> ) |
|-----------------------------------------------------------------------------------------------------|------------------------------------------------------------|-----------------------------------------------------------|------------------------------------------------------------|-----------------------------------------------------------|
| <b>BE0007R</b><br>basecase<br>wo. isoprene<br>wo. BVOCs<br>2xNO <sub>x</sub><br>0.5xNO <sub>x</sub> | 1.89                                                       |                                                           | 1.584<br>1.553<br>1.330<br>1.418<br>1.654                  | 1.614<br>1.582<br>1.356<br>1.502<br>1.692                 |
| <b>CZ0003R</b><br>basecase<br>wo. isoprene<br>wo. BVOCs<br>2xNO <sub>x</sub><br>0.5xNO <sub>x</sub> | 2.64                                                       |                                                           | 1.289<br>1.273<br>1.086<br>1.238<br>1.326                  | 1.308<br>1.291<br>1.101<br>1.255<br>1.351                 |
| <b>DE0007R</b><br>basecase<br>wo. isoprene<br>wo. BVOCs<br>2xNO <sub>x</sub><br>0.5xNO <sub>x</sub> | 1.76                                                       |                                                           | 0.684<br>0.680<br>0.589<br>0.649<br>0.720                  | 0.706<br>0.703<br>0.609<br>0.672<br>0.743                 |
| <b>DE0043G</b><br>basecase<br>wo. isoprene<br>wo. BVOCs<br>2xNO <sub>x</sub><br>0.5xNO <sub>x</sub> |                                                            |                                                           | 1.372<br>1.340<br>1.037<br>1.274<br>1.407                  | 1.392<br>1.358<br>1.053<br>1.293<br>1.432                 |
| <b>DE0044R</b><br>basecase<br>wo. isoprene<br>wo. BVOCs<br>2xNO <sub>x</sub><br>0.5xNO <sub>x</sub> | 2.08                                                       |                                                           | 0.786<br>0.781<br>0.681<br>0.740<br>0.815                  | 0.809<br>0.804<br>0.702<br>0.761<br>0.839                 |
| <b>ES0021U</b><br>basecase<br>wo. isoprene<br>wo. BVOCs<br>2xNO <sub>x</sub><br>0.5xNO <sub>x</sub> |                                                            | 5.84                                                      | 2.322<br>2.193<br>1.844<br>2.207<br>2.384                  | 2.390<br>2.254<br>1.899<br>2.274<br>2.455                 |
| <b>ES1778R</b><br>basecase<br>wo. isoprene<br>wo. BVOCs<br>2xNO <sub>x</sub><br>0.5xNO <sub>x</sub> |                                                            | 3.74                                                      | 2.153<br>2.050<br>1.476<br>1.926<br>2.277                  | 2.212<br>2.096<br>1.513<br>1.980<br>2.344                 |
| <b>FI00050R</b><br>basecase                                                                         |                                                            |                                                           | 0.403                                                      | 0.404                                                     |

|                     |      |      |       |       |
|---------------------|------|------|-------|-------|
| wo. isoprene        |      |      | 0.396 | 0.398 |
| wo. BVOCs           |      |      | 0.183 | 0.185 |
| 2xNO <sub>x</sub>   |      |      | 0.386 | 0.388 |
| 0.5xNO <sub>x</sub> |      |      | 0.408 | 0.409 |
| <b>FR0020R</b>      |      |      |       |       |
| basecase            |      | 8.09 | 1.816 | 1.857 |
| wo. isoprene        |      |      | 1.770 | 1.808 |
| wo. BVOCs           |      |      | 1.566 | 1.601 |
| 2xNO <sub>x</sub>   |      |      | 1.768 | 1.807 |
| 0.5xNO <sub>x</sub> |      |      | 1.871 | 1.924 |
| <b>FR0022R</b>      |      |      |       |       |
| basecase            |      | 3.33 | 1.369 | 1.395 |
| wo. isoprene        |      |      | 1.303 | 1.327 |
| wo. BVOCs           |      |      | 1.111 | 1.133 |
| 2xNO <sub>x</sub>   |      |      | 1.307 | 1.333 |
| 0.5xNO <sub>x</sub> |      |      | 1.410 | 1.442 |
| <b>FR0027U</b>      |      |      |       |       |
| basecase            |      |      | 1.874 | 1.920 |
| wo. isoprene        |      |      | 1.838 | 1.883 |
| wo. BVOCs           |      |      | 1.705 | 1.747 |
| 2xNO <sub>x</sub>   |      |      | 1.760 | 1.805 |
| 0.5xNO <sub>x</sub> |      |      | 1.947 | 2.002 |
| <b>GB1055R</b>      |      |      |       |       |
| basecase            | 4.09 |      | 1.486 | 1.525 |
| wo. isoprene        |      |      | 1.436 | 1.471 |
| wo. BVOCs           |      |      | 1.304 | 1.335 |
| 2xNO <sub>x</sub>   |      |      | 1.418 | 1.456 |
| 0.5xNO <sub>x</sub> |      |      | 1.529 | 1.571 |
| <b>IE0031R</b>      |      |      |       |       |
| basecase            |      |      | 0.480 | 0.495 |
| wo. isoprene        |      |      | 0.451 | 0.474 |
| wo. BVOCs           |      |      | 0.381 | 0.402 |
| 2xNO <sub>x</sub>   |      |      | 0.470 | 0.496 |
| 0.5xNO <sub>x</sub> |      |      | 0.487 | 0.510 |
| <b>IT0004R</b>      |      |      |       |       |
| basecase            | 3.05 |      | 3.561 | 3.596 |
| wo. isoprene        |      |      | 3.413 | 3.446 |
| wo. BVOCs           |      |      | 2.787 | 2.815 |
| 2xNO <sub>x</sub>   |      |      | 3.307 | 3.346 |
| 0.5xNO <sub>x</sub> |      |      | 3.627 | 3.665 |
| <b>NO0002R</b>      |      |      |       |       |
| basecase            |      | 0.89 | 0.618 | 0.636 |
| wo. isoprene        |      |      | 0.613 | 0.630 |
| wo. BVOCs           |      |      | 0.554 | 0.569 |
| 2xNO <sub>x</sub>   |      |      | 0.606 | 0.625 |
| 0.5xNO <sub>x</sub> |      |      | 0.638 | 0.655 |

79

80

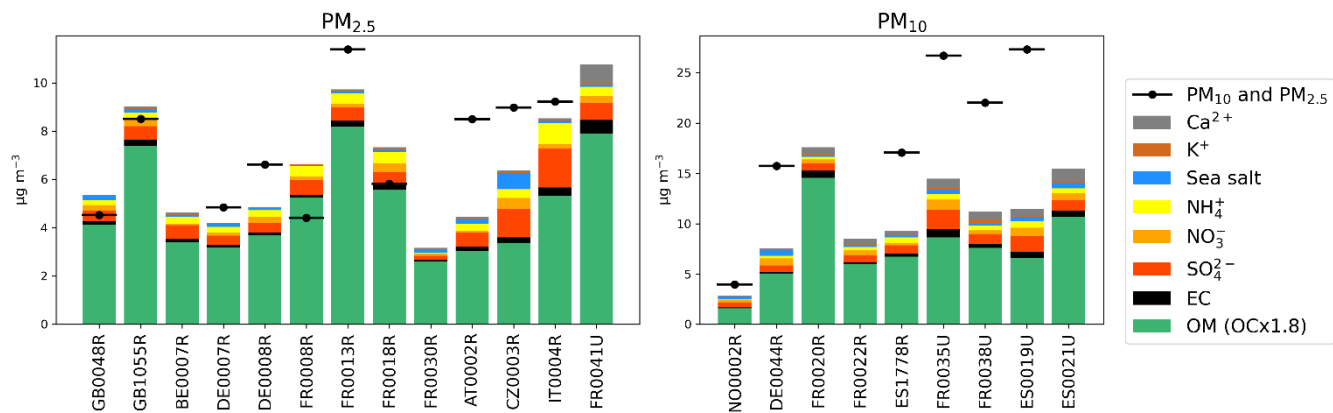

**Figure S13. Average chemical speciation and total PM mass concentration (when available) for PM<sub>2.5</sub> (left) and PM<sub>10</sub> (right) for 12-19 July 2022.**

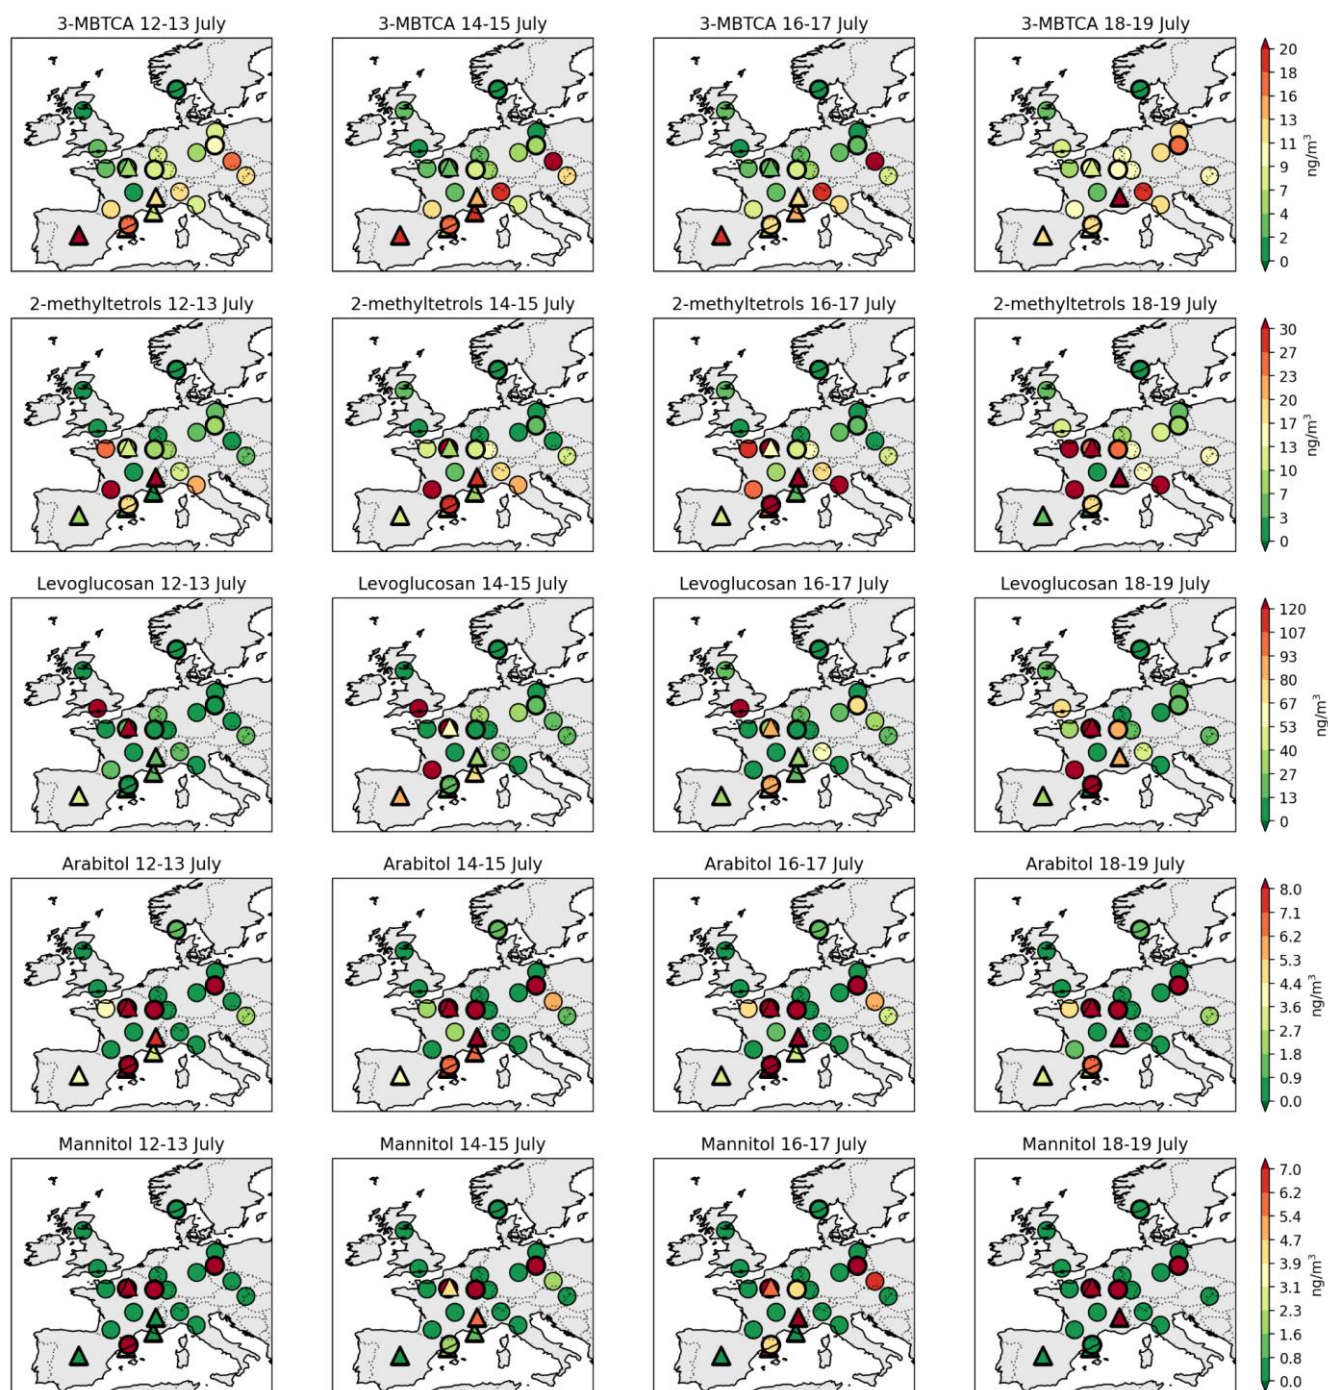

Figure S14. Temporal and spatial variations of different organic tracers. The groups sum the average concentrations for all the relevant components for 4 two-days periods from 12-19 July, 2022. Urban sites are marked with triangles. Sites with a PM<sub>10</sub> size cut-off are marked with a thicker border than those with a PM<sub>2.5</sub> cut-off.



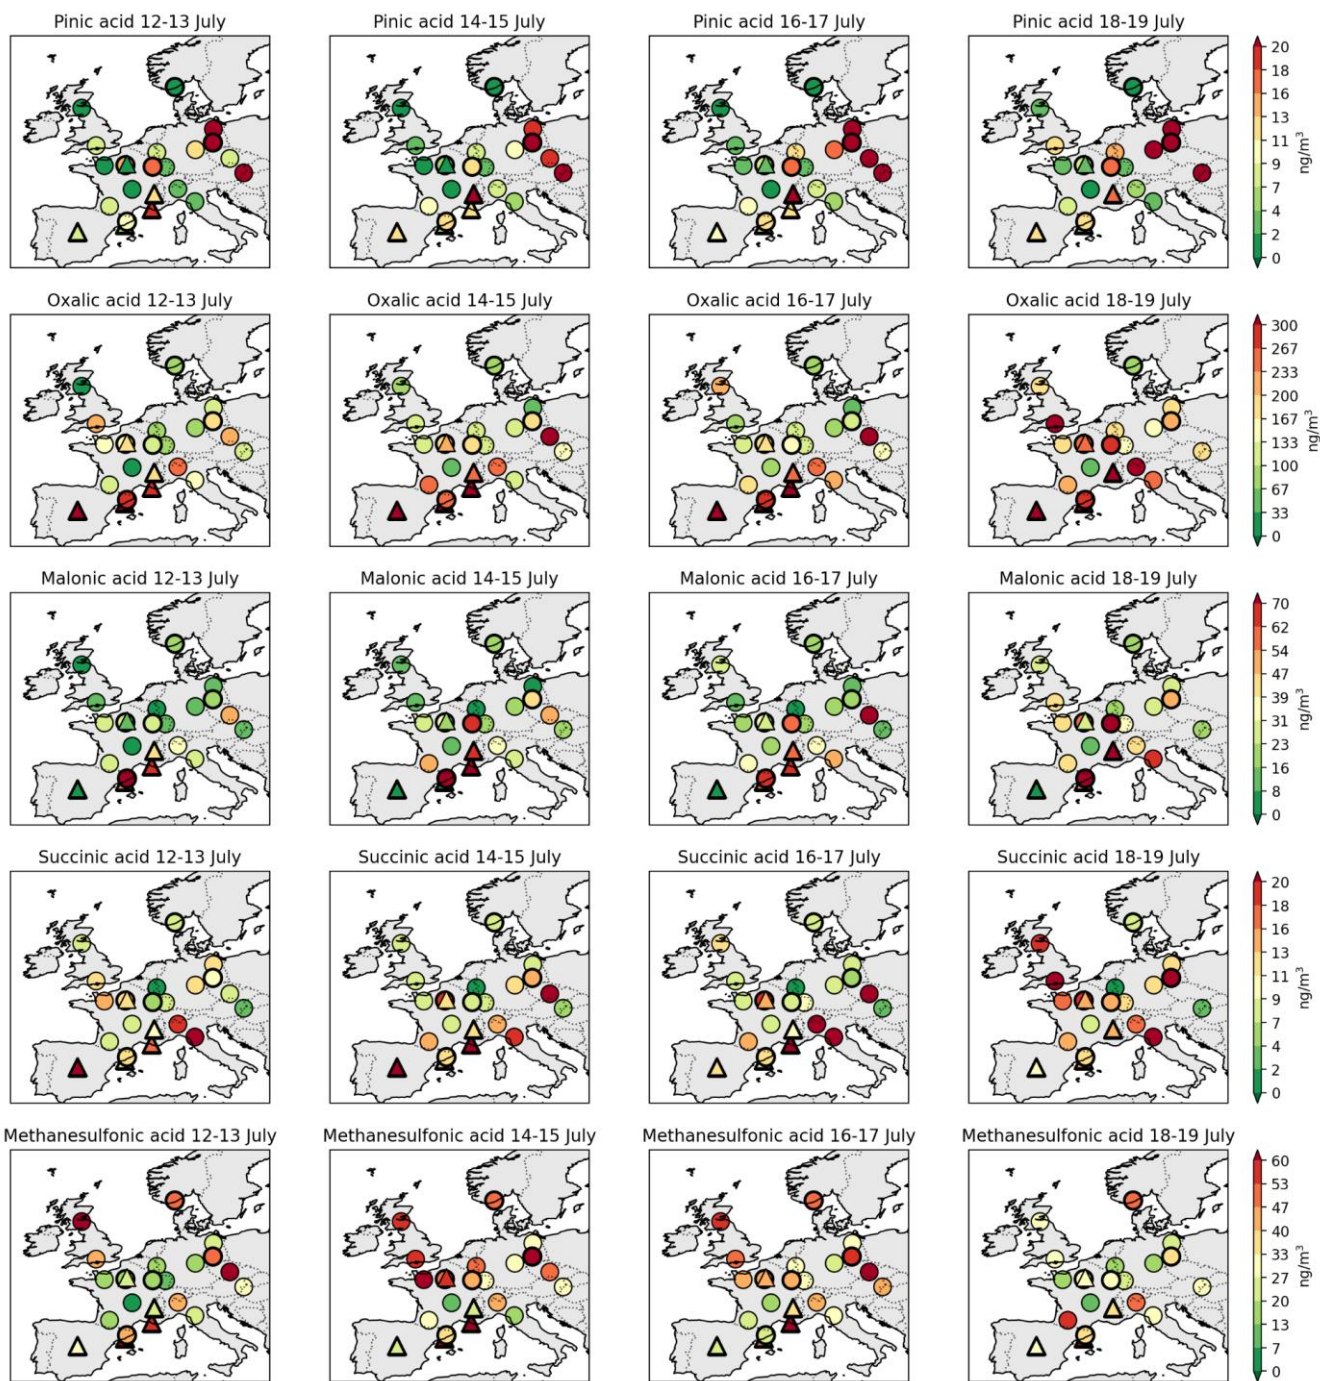

**Figure S15. Spatial and temporal distribution of different organic acids. Urban sites are denoted with a triangle. Sites with a PM<sub>10</sub> size cut-off are marked with a thicker border than those with a PM<sub>2.5</sub> cut-off.**



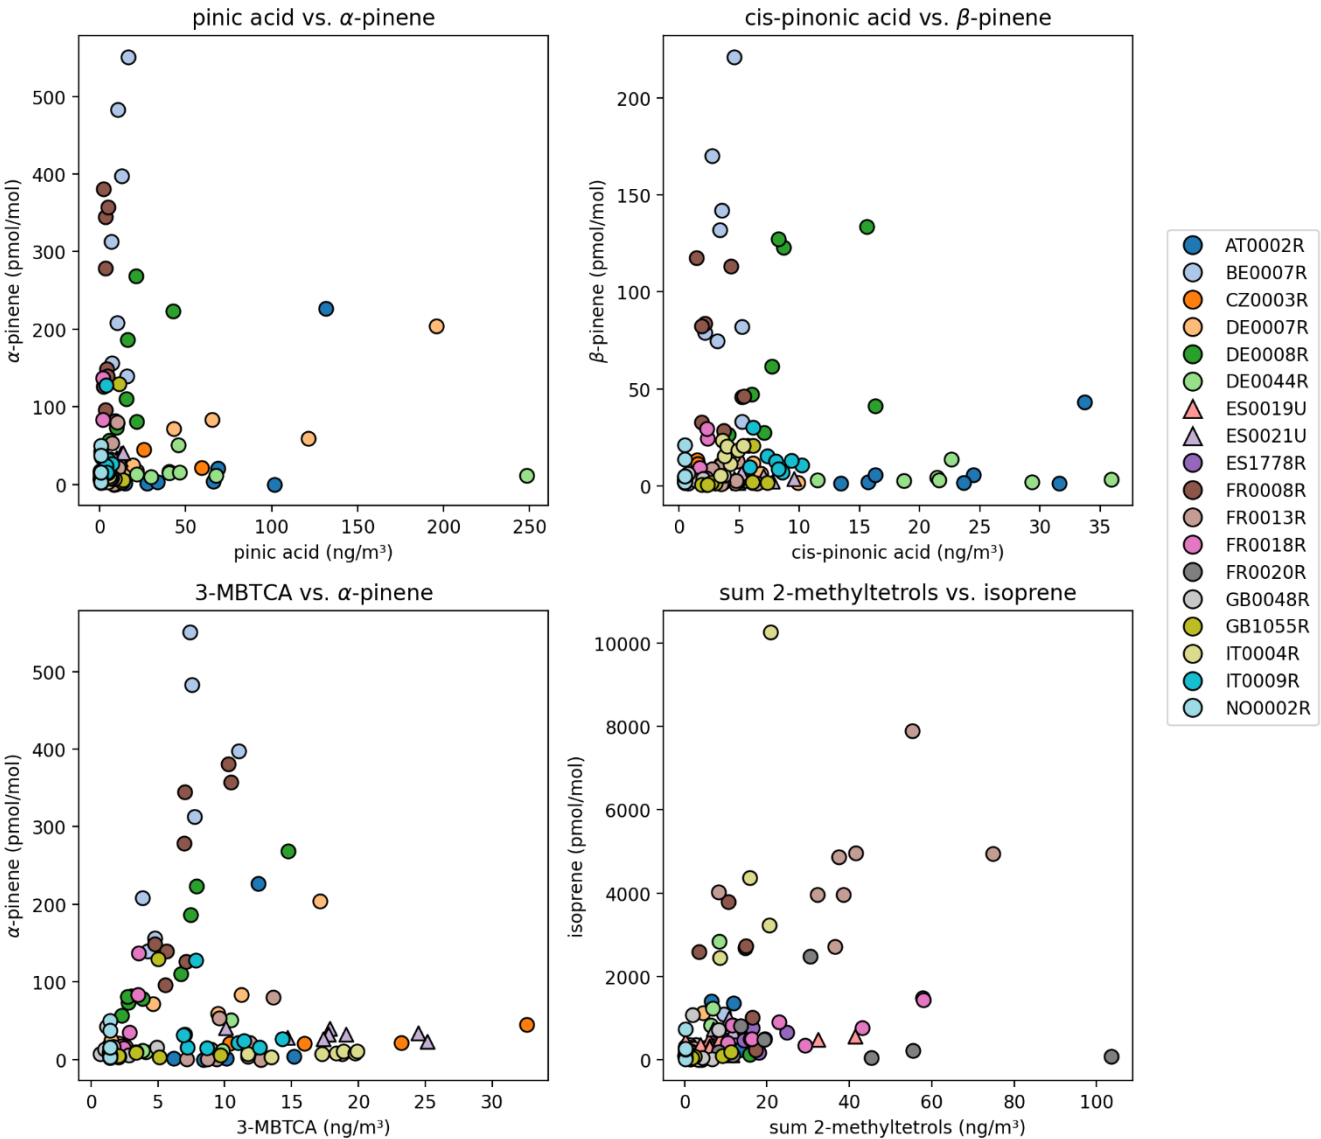

93

94 **Figure S16. Scatter plots of selected BVOCs and some of their expected oxidation products. Each marker indicates one day during**  
95 **12-19 July 2022. Note that the organic tracer (x-axis) is a 24-hour sample, whereas the selected BVOCs (y-axis) come from samples**  
96 **taken between 12-16 UTC over a period of 2 to 4 hours.**

97  
98  
99  
100  
101

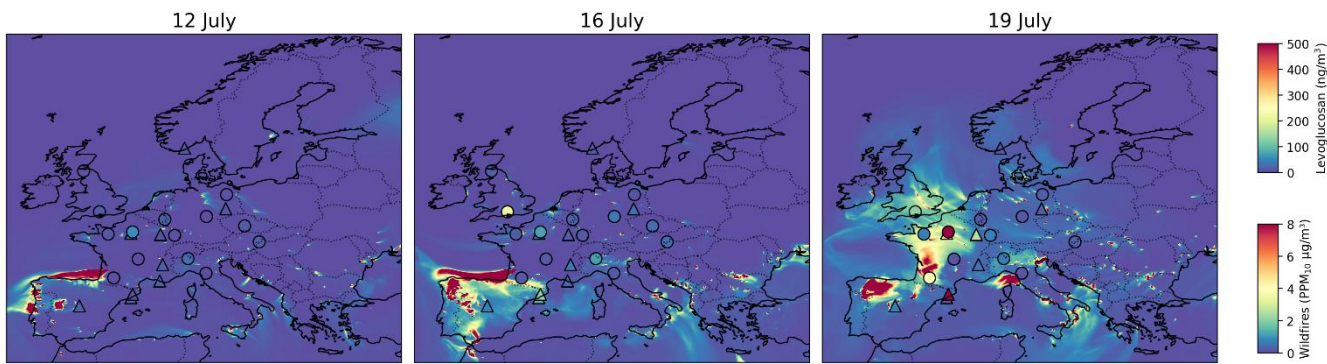

**Figure S17. Daily average concentrations of primary PM<sub>10</sub> (PPM<sub>10</sub>) from wildfires calculated with the EMEP model, overlaid with observed levoglucosan concentrations for 12, 16, and 19 July 2022. Sites with a PM<sub>10</sub> cutoff are shown as triangles, while those with PM<sub>2.5</sub> are shown as circles.**

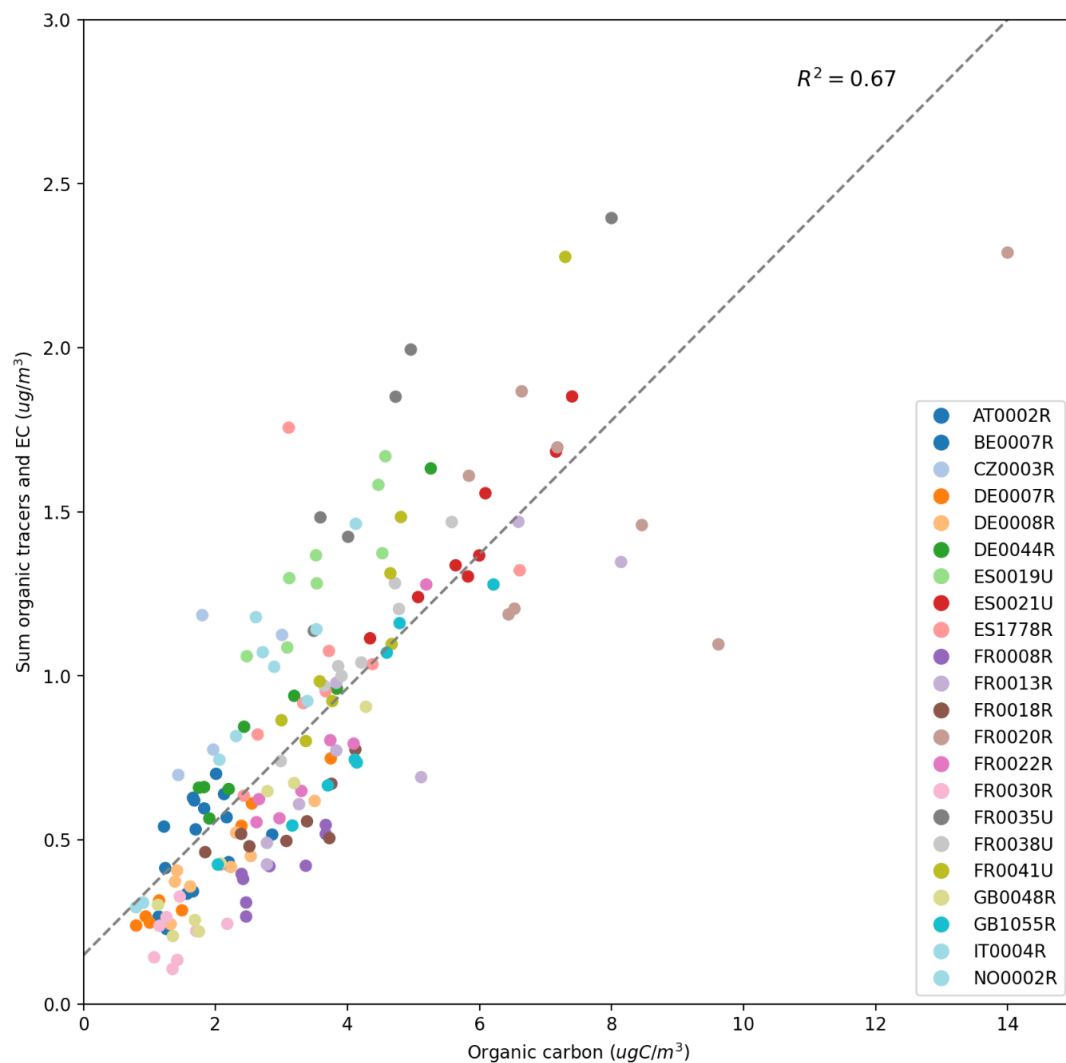

**Figure S18. Sum of all tracer concentrations and EC for each sample vs. the OC concentration in the same sample.**

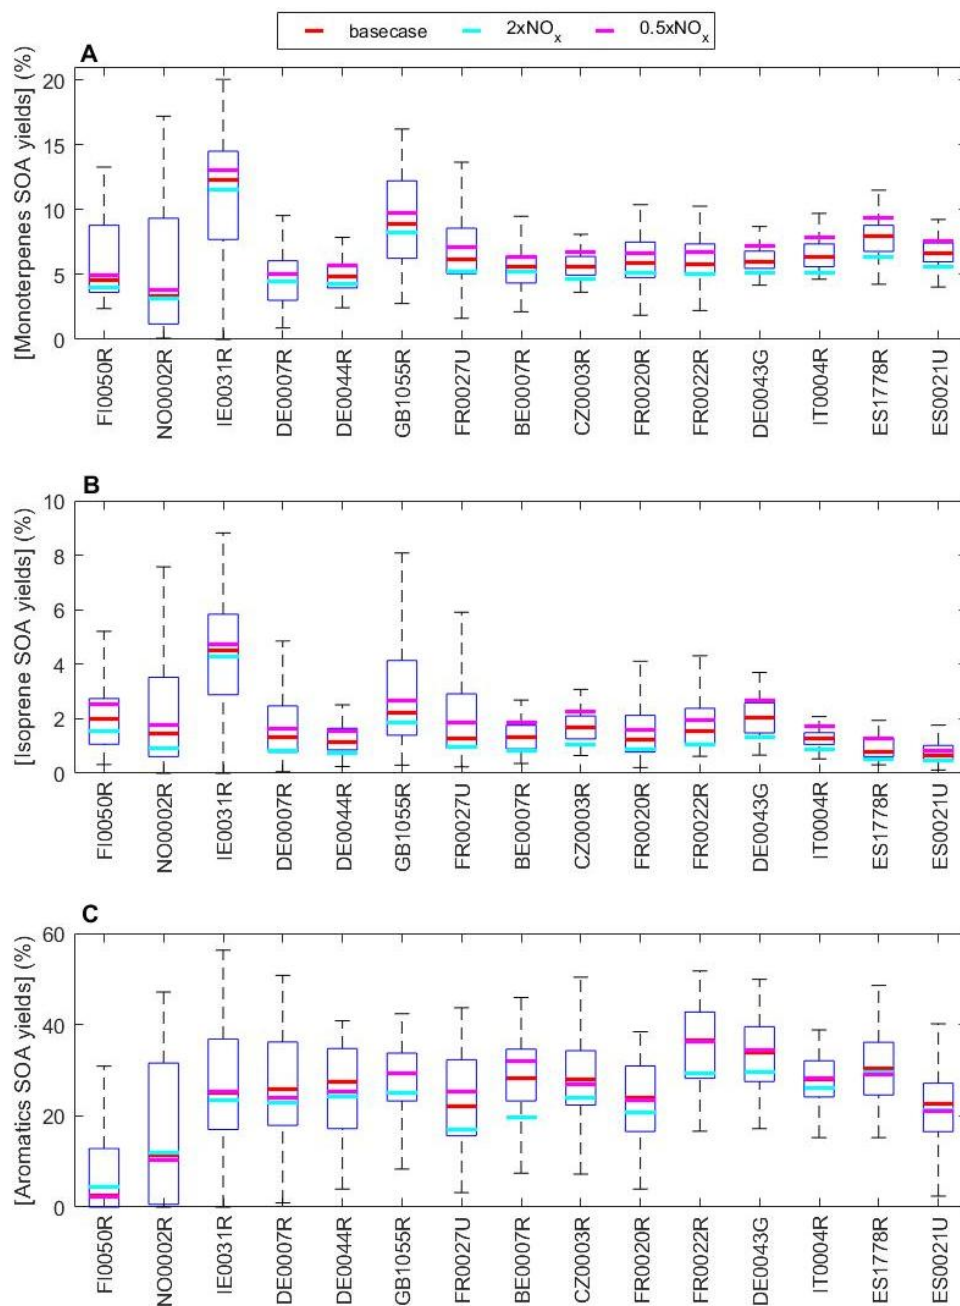

**Figure S19. Modelled 10-day cumulative SOA mass yields along the simulated air mass trajectories for (A) monoterpenes ( $\alpha$ -pinene,  $\beta$ -pinene, 3-carene, limonene), (B) isoprene and (C) the relatively short-lived aromatic compounds (toluene, xylenes (*m*-xylene, *p*-xylene, *o*-xylene) and phenols (phenol, cresol, 2,4-xyleneol, 2,3-xyleneol, 2,5-xyleneol)).** SOA mass yields were calculated as the ratio of the SOA mass formed by condensation in the lowermost 2,100 m of the atmosphere to the total cumulative SOA precursor emissions along the air mass trajectories. The boxes represent the 25-75 percentiles of the modelled (basecase) SOA yields at the different stations. Shown are also the yields with anthropogenic NO<sub>x</sub> emissions scaled with a factor of 0.5 or 2.0 (0.5xNO<sub>x</sub> and 2xNO<sub>x</sub>).

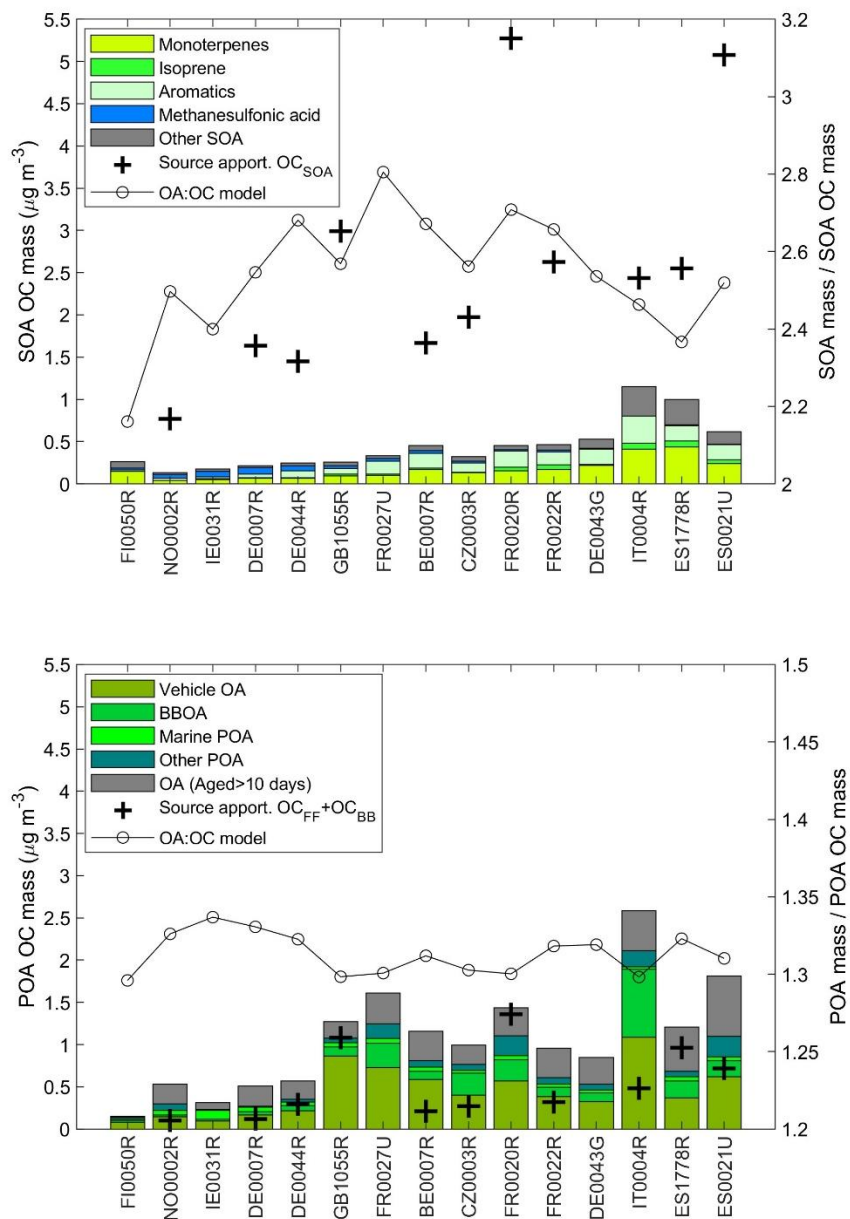

Figure S20. Modelled averaged surface SOA (top panel) and POA (bottom panel) mass concentrations divided into source categories and compared to source apportionment estimates from the tracer method. Solid line indicates the SOA (POA) mass to the SOA (POA) OC mass.

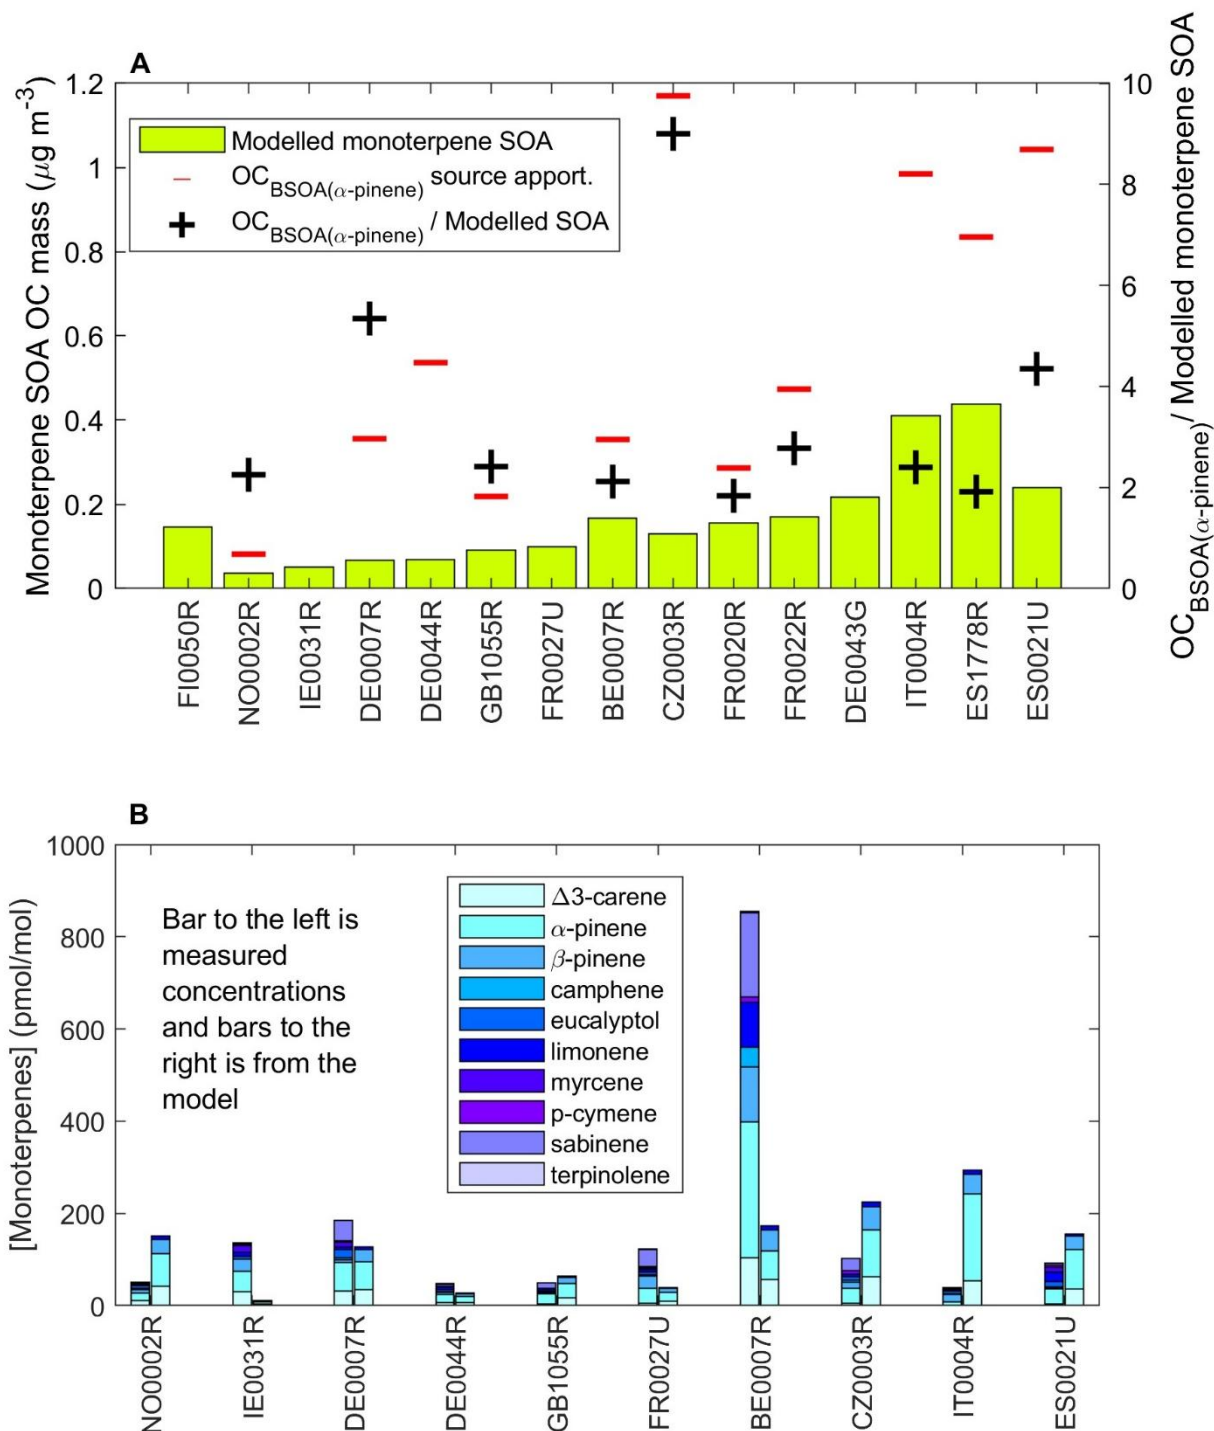

Figure S21. Estimated SOA concentrations from monoterpenes (A, top panel) and concentrations of the individual monoterpenes (B, bottom panel)

120  
121

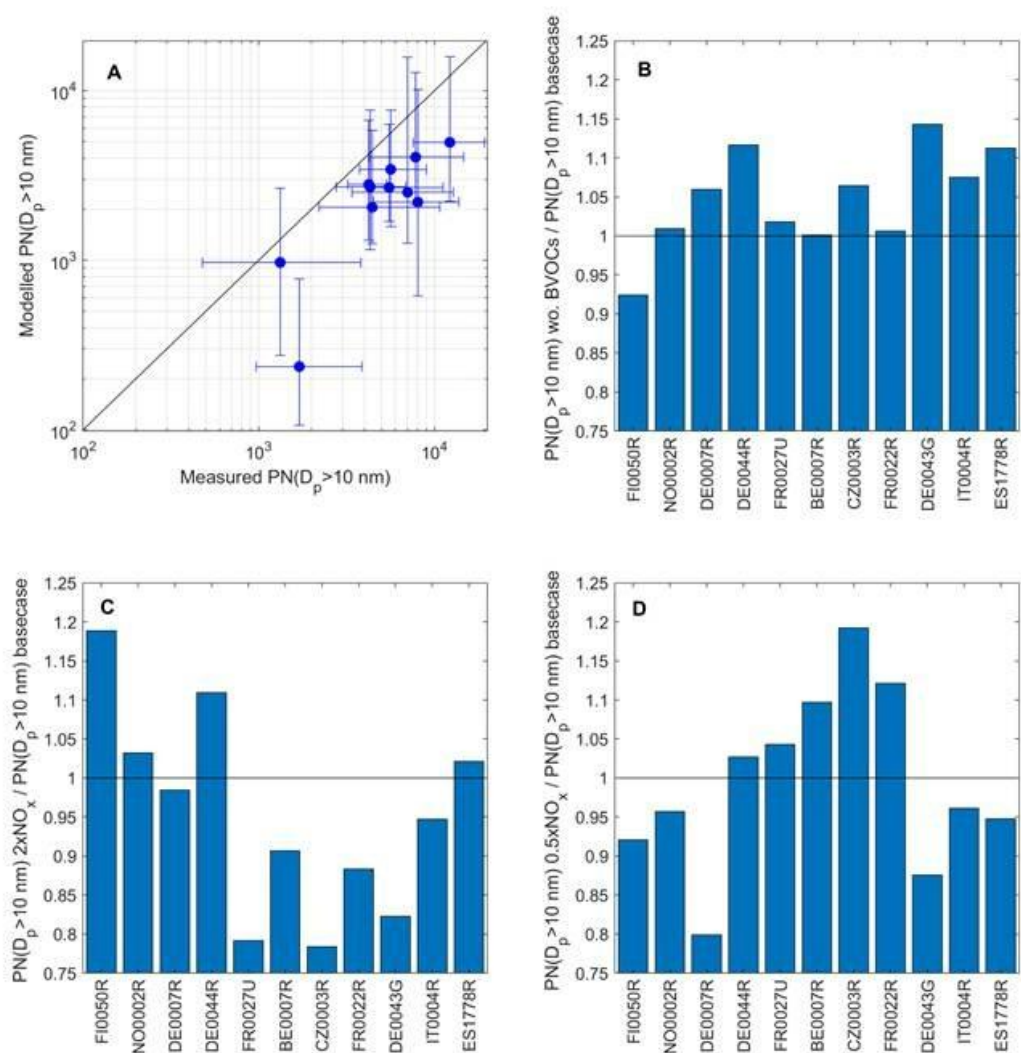

122

123 **Figure S22. Measured and modelled (ADCHEM) number concentrations of submicron particles larger than 10 nm in**  
124 **diameter at 11 stations. Panel A – scatter plot with the measured particle number concentrations (PN) on the x-axis**  
125 **and modelled PN concentrations on the y-axis. The dots correspond to the median values and the vertical and horizontal**  
126 **whiskers in panels A cover the 10-90 percentile ranges of the modelled and measured PN at each station. Panel B-D**  
127 **shows the ratio between the median PN from the three sensitivity test simulations (wo. BVOCs, 2xNO<sub>x</sub> and 0.5xNO<sub>x</sub>)**  
128 **and the base case simulations.**



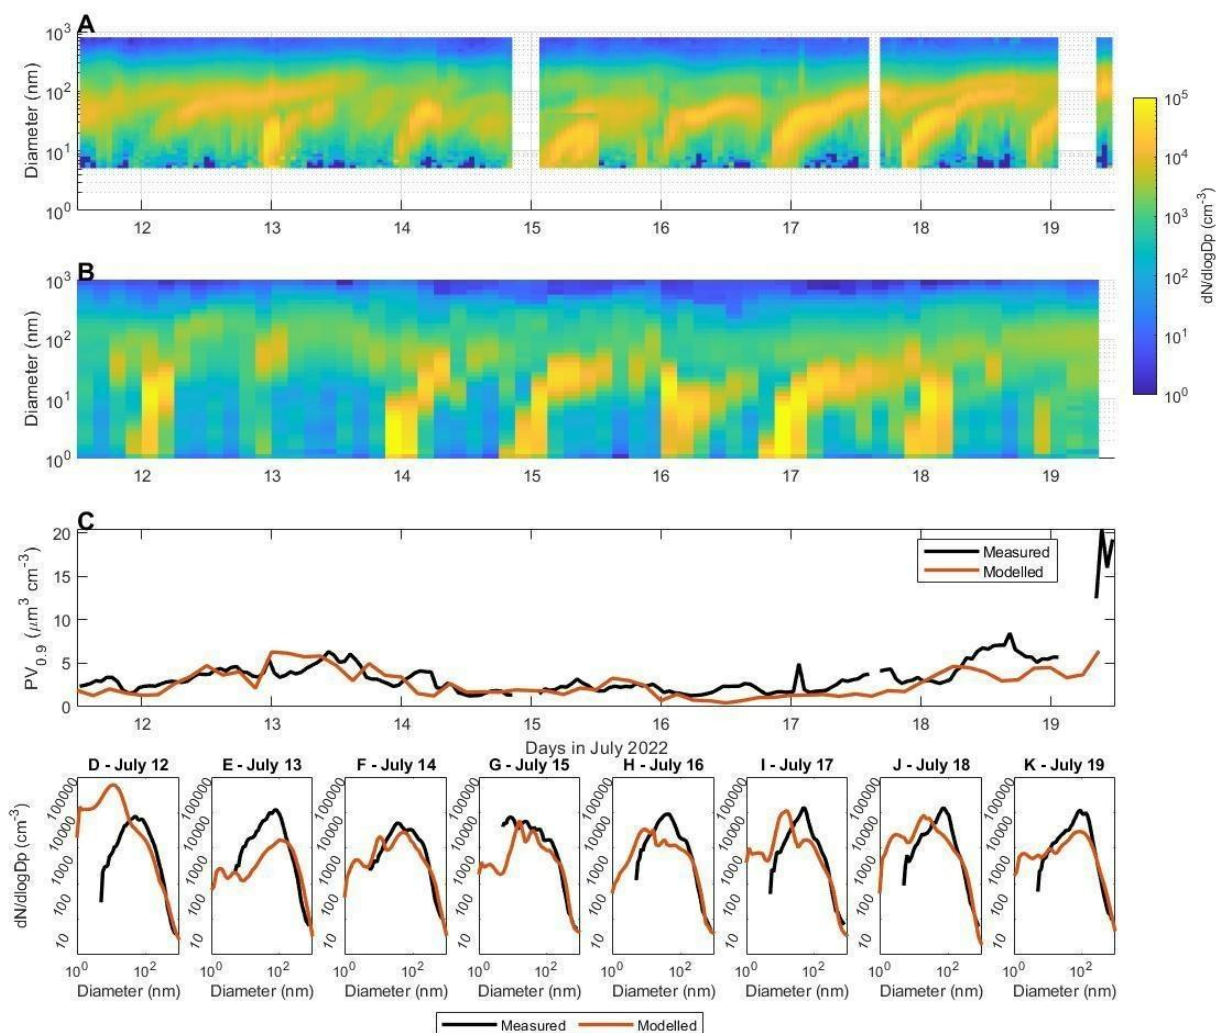

**Figure S23. Modelled and measured submicron particle concentrations at Melpitz (DE0044R). Panels A and B show the measured (DMPS) and modelled particle number size distributions, respectively, from July 12 to July 19, 2022. Panel C compares the measured (DMPS) and modelled particle volume concentrations for particles smaller than 0.9  $\mu\text{m}$  in diameter. Panels D to K compare the measured and modelled median particle number size distributions for each campaign day.**

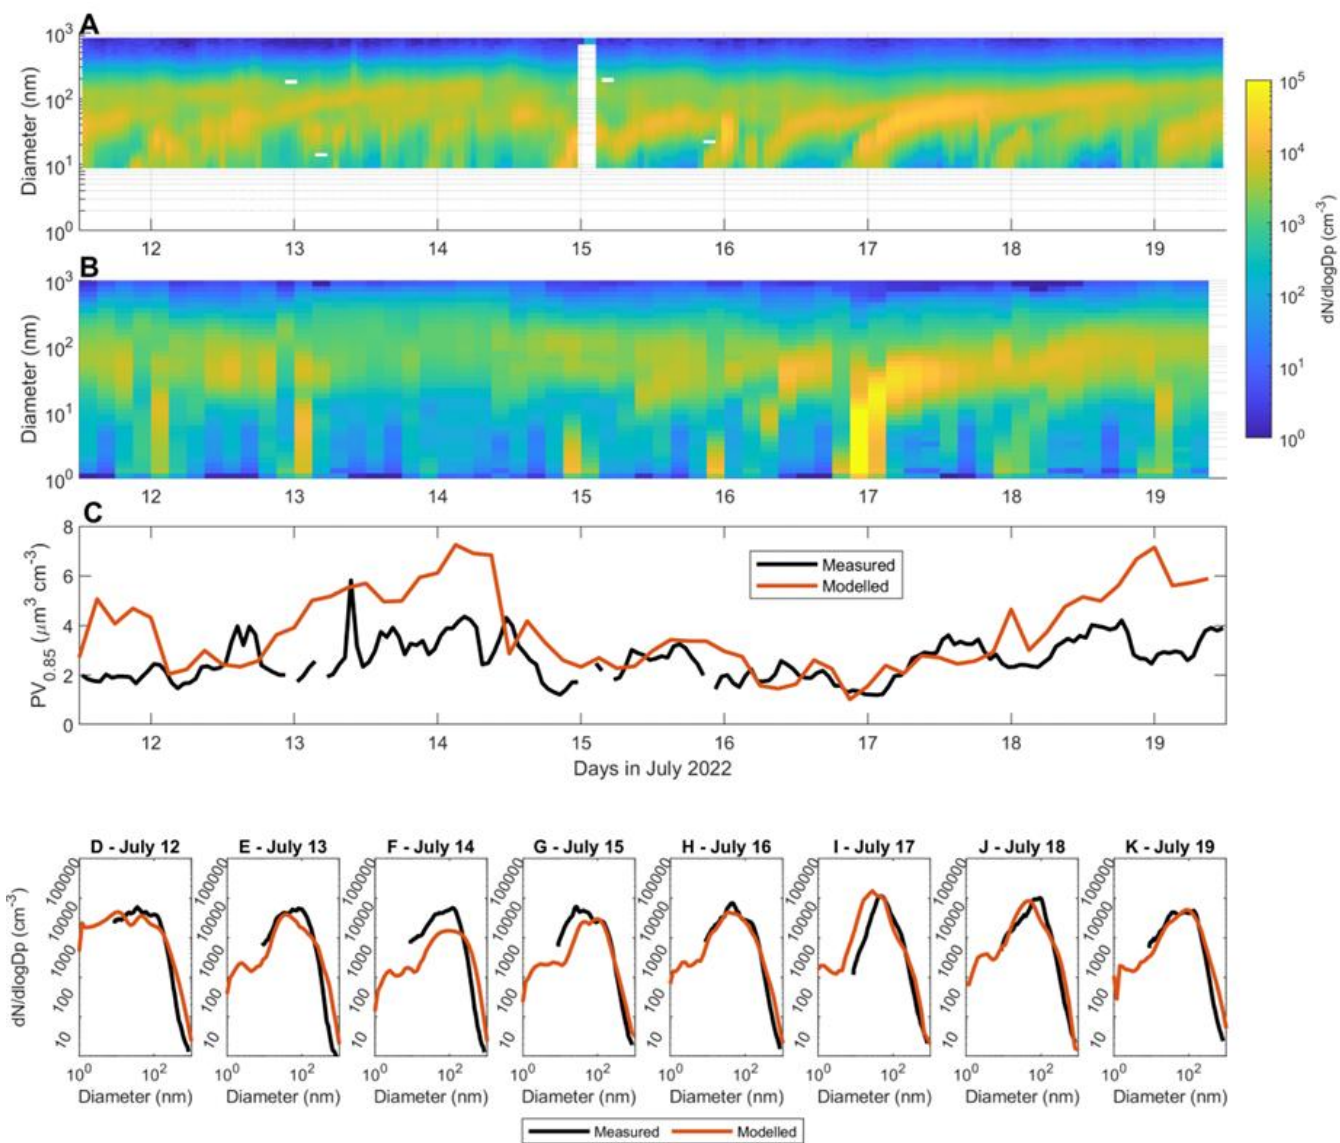

Figure S24. As S23 but for Kosetice (CZ0003R)

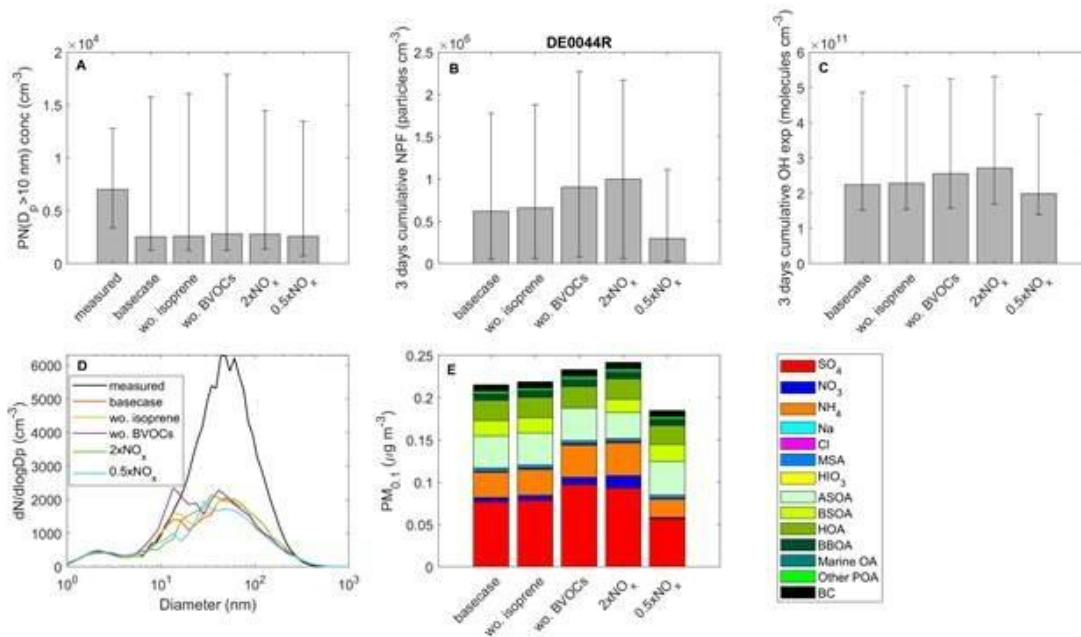

**Figure S25. Modelled and measured submicron particle concentrations at Melpitz (DE0044R).** The model results are from the ADCHEM base case simulations (basecase), simulations without isoprene emissions (wo. isoprene), without BVOC emissions (wo. BVOCs), and anthropogenic NO<sub>x</sub> emissions scaled with a factor of 0.5 or 2.0 (0.5xNO<sub>x</sub> and 2xNO<sub>x</sub>). Panel A compares the measured and modelled median number concentrations of particles larger than 10 nm in diameter. Panel B shows the modelled cumulative new particle formation (NPF) averaged over the lowest 2,100 m of the atmosphere during the past 3 days upwind the station. Panel C shows the modelled cumulative OH exposure averaged over the lowest 2,100 m of the atmosphere during the past 3 days upwind the station. The measured and modelled median particle number size distributions are compared in panel D. Panel E shows the modelled chemical composition for particles less than 0.1 µm in diameter, i.e. the ultrafine particle (UFP) chemical composition. The whiskers in panels A-C cover the 10-90 percentile range.

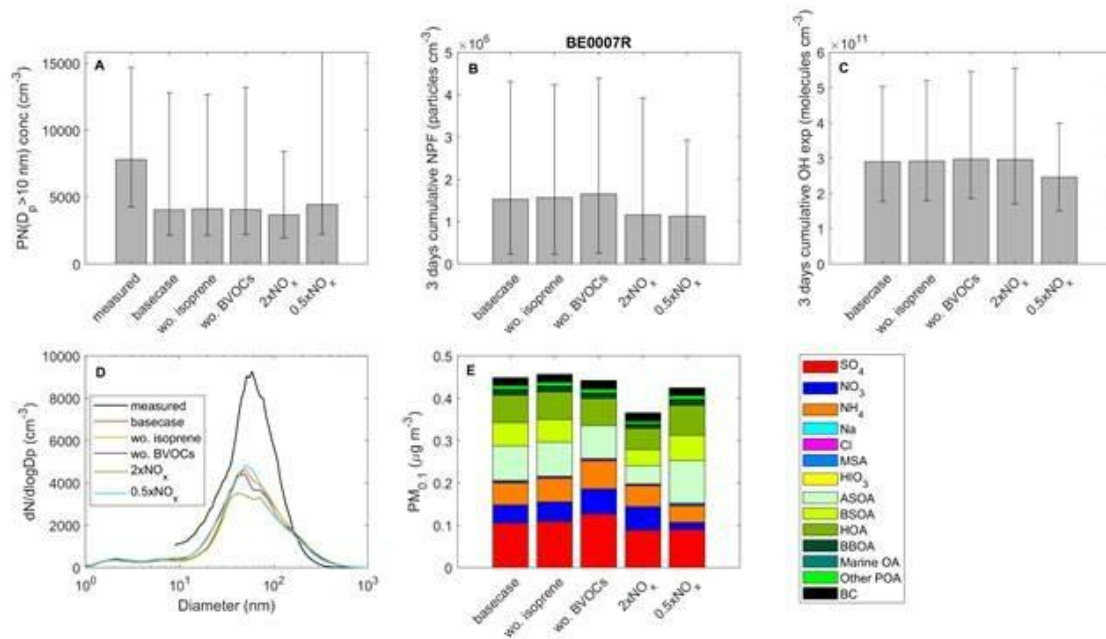

Figure S26. As S25 but for Vielsalm (BE0007R)

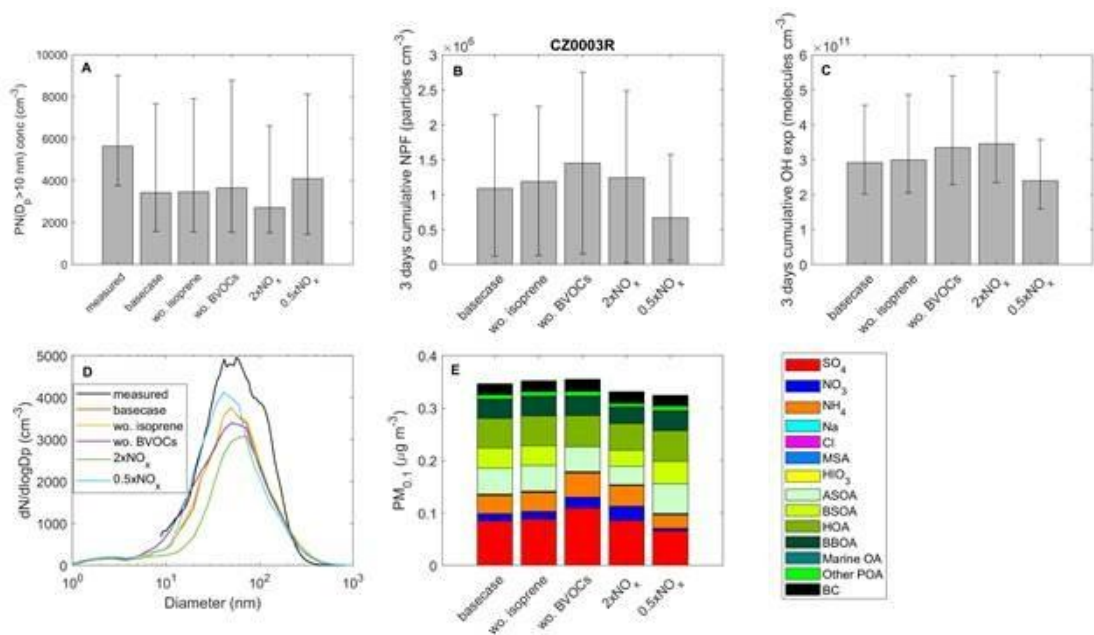

Figure S27. As S25 but for Kosetice (CZ0003R)

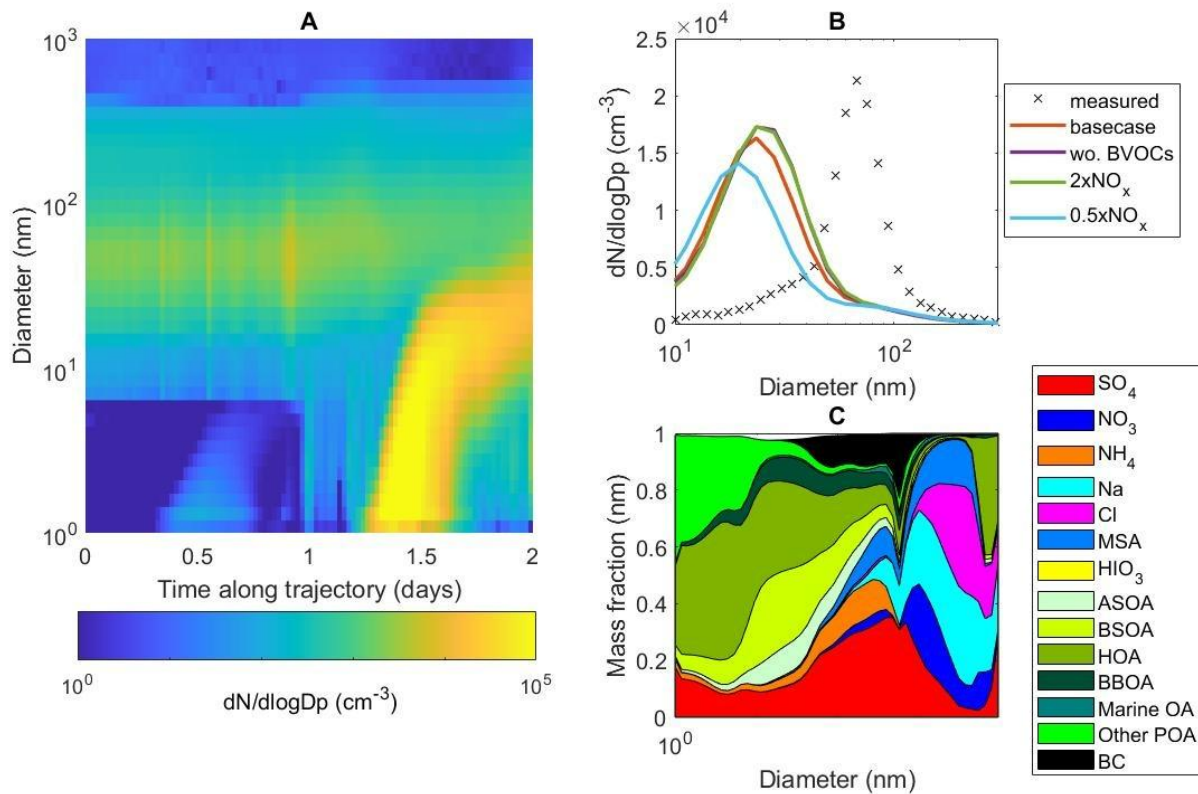

**Figure S28. Modelled NPF and particle growth along an air mass trajectory that arrives at Melpitz in the midnight between July 17th and July 18th. Panel A shows the evolution of the modelled particle number size distribution (PNSD) along the air mass trajectory from the basecase model set-up. Panel B compares the measured PNSD at Melpitz at midnight with the modelled PNSD from the basecase, wo. BVOCs,  $2x\text{NO}_x$  and  $0.5x\text{NO}_x$  model simulations. Panel C shows the modelled size resolved particle chemical composition from the basecase simulation at Melpitz at midnight.**



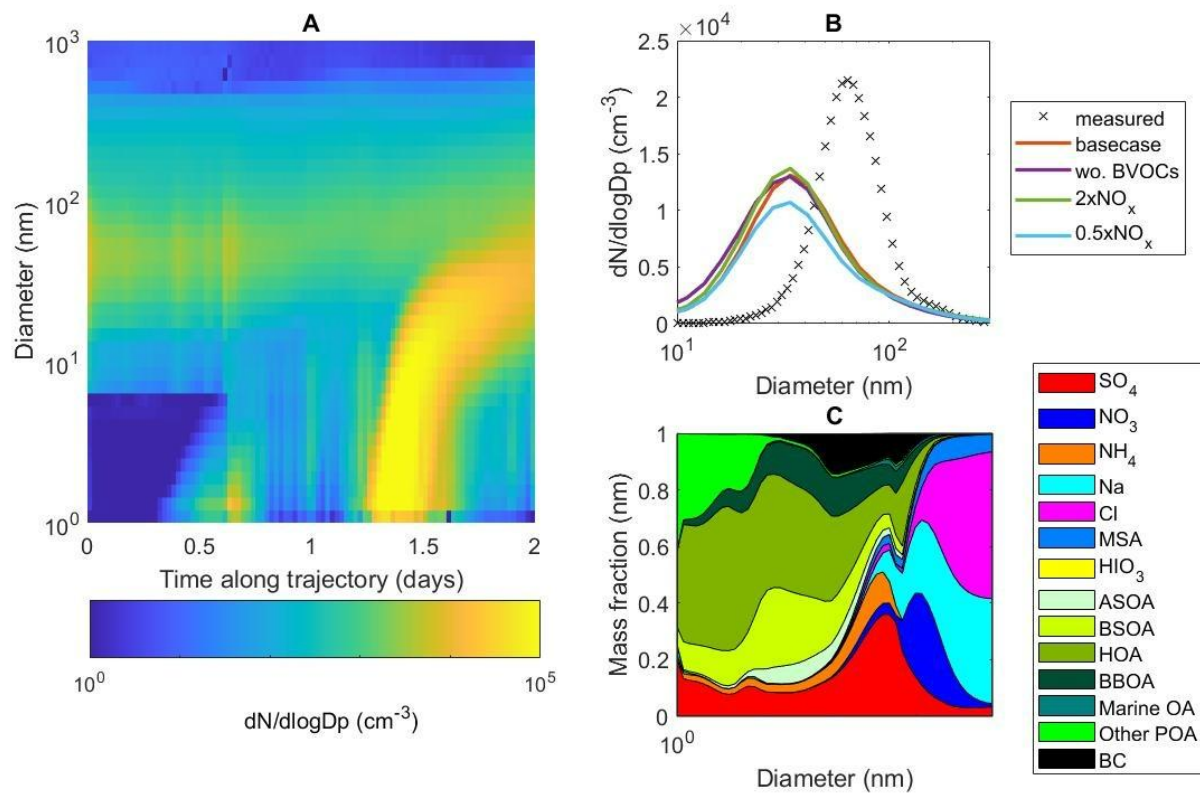

162

163 **Figure S29. Same as S28 but for Kosetice.**

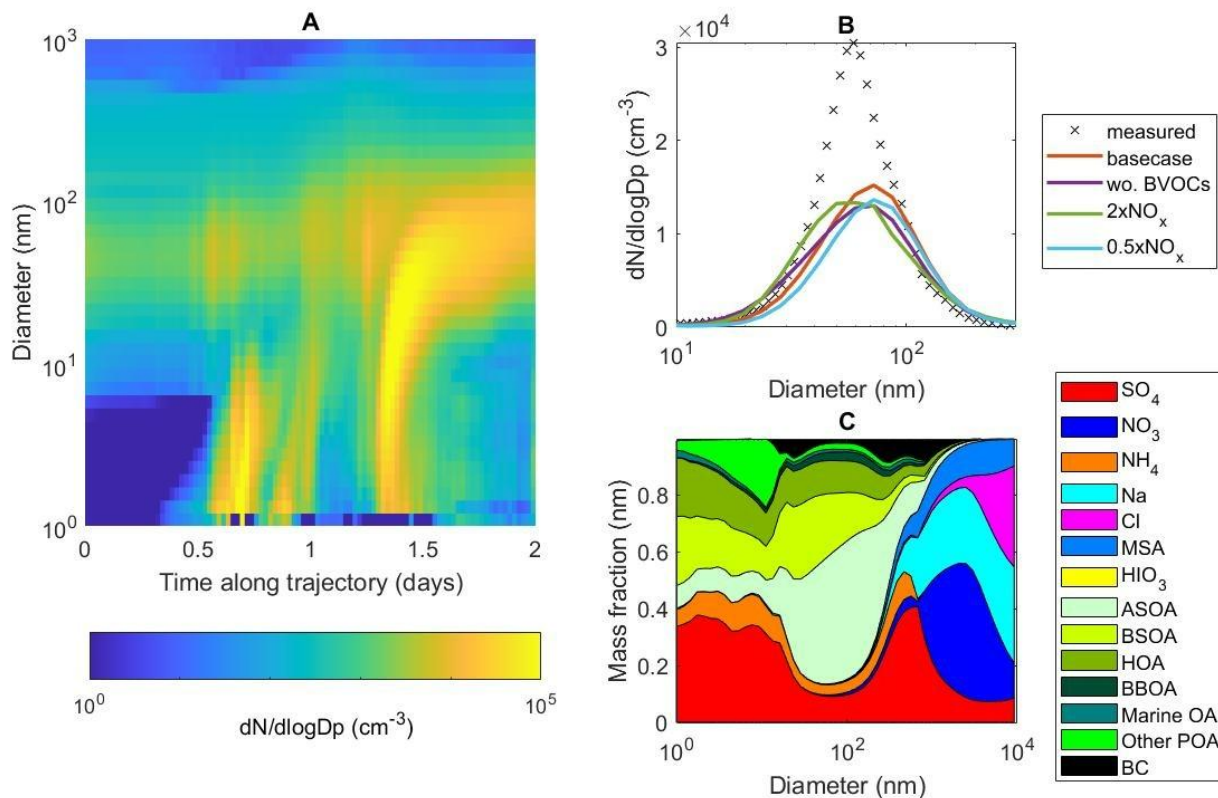

**Figure S30. Same as S28 but for Vielsalm.**

## References

- Ehlers, C., Klemp, D., Rohrer, F., Mihelcic, D., Wegener, R., Kiendler-Scharr, A., and Wahner, A.: Twenty years of ambient observations of nitrogen oxides and specified hydrocarbons in air masses dominated by traffic emissions in Germany, *Faraday Discuss.*, 189, 407–437, <https://doi.org/10.1039/C5FD00180C>, 2016.
- Hamer, P. D., Markelj, M., Rojas-Munoz, O., Bonan, B., Calvet, J.-C., Marécal, V., Guenther, A., Trimmel, H., Vallejo, I., Eckhardt, S., Sousa Santos, G., Sindelarova, K., Simpson, D., Schmidbauer, N., and Tarrasón, L.: Two Biogenic Volatile Organic Compound Emission Datasets over Europe Based on Land Surface Modelling and Satellite Data Assimilation, <https://doi.org/10.5194/essd-2025-442>, 2 October 2025.
- Hersbach, H., Bell, B., Berrisford, P., Biavati, G., Horányi, A., Muñoz Sabater, J., Nicolas, J., Peubey, C., Radu, R., Rozum, I., Schepers, D., Simmons, A., Soci, C., Dee, D., and Thépaut, J.-N.: ERA5 hourly data on single levels from 1940 to present, <https://doi.org/10.24381/CDS.ADBB2D47>, 2023.
- Hjellbrekke, A.-G. and Solberg, S.: Ozone measurements 2022, NILU, Kjeller Norway, 2024.
